# Supplementary material for: New insights from bidirectional Mendelian randomization: causal relationships between telomere length and mitochondrial DNA copy number in aging biomarkers
Source: Aging (Albany NY). 2024 Apr 24;16(8):7387–404. doi: 10.18632/aging.205765 (PMC11087129; doi:10.18632/aging.205765)
Supplement: Supplementary Table 1 [file aging-16-205765-s002.xlsx]

## Sheet: Table s1 IVs related to mtDNA c
Supplementary Table 1. IVs related to mtDNA copy number as exposure including F value.
	chr.exposure	pos.exposure	beta.exposure	se.exposure	pval.exposure	samplesize.exposure	id.exposure	SNP	effect_allele.exposure	other_allele.exposure	eaf.exposure	exposure	mr_keep.exposure	pval_origin.exposure	data_source.exposure	reliability.exposure	r2	F
1	1	2996602	0.0189	0.0025	6.87068e-14	383476	ebi-a-GCST90026372	rs1569419	C	T	0.7555	Mitochondrial DNA copy number || id:ebi-a-GCST90026372	TRUE	reported	igd	high	0.000149019	57.1533
2	1	25622199	0.0213	0.0027	7.86865e-15	383476	ebi-a-GCST90026372	rs182346769	A	G	0.0656	Mitochondrial DNA copy number || id:ebi-a-GCST90026372	TRUE	reported	igd	high	0.000162264	62.2342
3	1	171939290	0.0162	0.0027	1.46599e-09	383476	ebi-a-GCST90026372	rs2038479	A	C	0.832	Mitochondrial DNA copy number || id:ebi-a-GCST90026372	TRUE	reported	igd	high	9.38693e-05	35.9998
4	1	248020448	0.0155	0.0025	5.434e-10	383476	ebi-a-GCST90026372	rs10749636	A	G	0.7694	Mitochondrial DNA copy number || id:ebi-a-GCST90026372	TRUE	reported	igd	high	0.000100231	38.4398
5	1	768253	0.0236	0.0025	2.58107e-21	383476	ebi-a-GCST90026372	rs2977608	C	A	0.7783	Mitochondrial DNA copy number || id:ebi-a-GCST90026372	TRUE	reported	igd	high	0.00023233	89.1131
6	1	25583610	0.0457	0.0021	8.24138e-101	383476	ebi-a-GCST90026372	rs72660908	G	C	0.3877	Mitochondrial DNA copy number || id:ebi-a-GCST90026372	TRUE	reported	igd	high	0.00123344	473.578
7	1	156450873	-0.0139	0.0022	4.08696e-10	383476	ebi-a-GCST90026372	rs2274319	C	T	0.675	Mitochondrial DNA copy number || id:ebi-a-GCST90026372	TRUE	reported	igd	high	0.000104088	39.9192
8	1	172381181	0.0127	0.0023	2.61403e-08	383476	ebi-a-GCST90026372	rs143989240	TTG	T	0.3101	Mitochondrial DNA copy number || id:ebi-a-GCST90026372	TRUE	reported	igd	low	7.95022e-05	30.4894
9	1	12042443	-0.0179	0.0021	3.32966e-17	383476	ebi-a-GCST90026372	rs4846082	T	C	0.4722	Mitochondrial DNA copy number || id:ebi-a-GCST90026372	TRUE	reported	igd	high	0.000189429	72.6549
10	2	74166053	-0.0903	0.0063	4.63447e-47	383476	ebi-a-GCST90026372	rs62641680	A	G	0.0249	Mitochondrial DNA copy number || id:ebi-a-GCST90026372	TRUE	reported	igd	high	0.000535456	205.443
11	2	160677375	-0.0133	0.0024	1.72001e-08	383476	ebi-a-GCST90026372	rs12052715	G	C	0.6938	Mitochondrial DNA copy number || id:ebi-a-GCST90026372	TRUE	reported	igd	high	8.0077e-05	30.7099
12	2	74177777	-0.0819	0.0071	3.6166e-31	383476	ebi-a-GCST90026372	rs74874677	G	A	0.0298	Mitochondrial DNA copy number || id:ebi-a-GCST90026372	TRUE	reported	igd	high	0.000346866	133.06
13	2	241510903	-0.021	0.0031	1.003e-11	383476	ebi-a-GCST90026372	rs78909033	A	G	0.1233	Mitochondrial DNA copy number || id:ebi-a-GCST90026372	TRUE	reported	igd	high	0.000119653	45.8895
14	3	56849749	-0.0268	0.0022	2.0488e-35	383476	ebi-a-GCST90026372	rs1354034	C	T	0.5994	Mitochondrial DNA copy number || id:ebi-a-GCST90026372	TRUE	reported	igd	high	0.000386828	148.396
15	3	39188182	0.0244	0.0033	2.18877e-13	383476	ebi-a-GCST90026372	rs13084580	T	C	0.1014	Mitochondrial DNA copy number || id:ebi-a-GCST90026372	TRUE	reported	igd	high	0.000142545	54.6701
16	3	179146844	0.0171	0.0025	1.16305e-11	383476	ebi-a-GCST90026372	rs9844549	G	A	0.2714	Mitochondrial DNA copy number || id:ebi-a-GCST90026372	TRUE	reported	igd	high	0.000121989	46.7854
17	3	71771215	0.014	0.0023	2.02102e-09	383476	ebi-a-GCST90026372	rs34778241	TG	T	0.3817	Mitochondrial DNA copy number || id:ebi-a-GCST90026372	TRUE	reported	igd	low	9.66096e-05	37.0508
18	4	102821550	-0.0121	0.0021	9.74002e-09	383476	ebi-a-GCST90026372	rs10013187	A	C	0.5378	Mitochondrial DNA copy number || id:ebi-a-GCST90026372	TRUE	reported	igd	high	8.65678e-05	33.1994
19	5	88180196	0.0331	0.0045	3.04089e-13	383476	ebi-a-GCST90026372	rs114694170	C	T	0.0537	Mitochondrial DNA copy number || id:ebi-a-GCST90026372	TRUE	reported	igd	high	0.000141069	54.1039
20	5	1285974	0.0178	0.0023	6.45654e-15	383476	ebi-a-GCST90026372	rs7705526	A	C	0.337	Mitochondrial DNA copy number || id:ebi-a-GCST90026372	TRUE	reported	igd	high	0.000156163	59.8938
21	5	72046100	-0.0181	0.0031	6.27292e-09	383476	ebi-a-GCST90026372	rs36009521	T	TA	0.1382	Mitochondrial DNA copy number || id:ebi-a-GCST90026372	TRUE	reported	igd	low	8.88908e-05	34.0904
22	6	135431640	0.018	0.0024	1.93286e-13	383476	ebi-a-GCST90026372	rs9494142	C	T	0.2485	Mitochondrial DNA copy number || id:ebi-a-GCST90026372	TRUE	reported	igd	high	0.000146663	56.2497
23	6	25522443	0.0149	0.0025	3.21299e-09	383476	ebi-a-GCST90026372	rs212938	G	A	0.7773	Mitochondrial DNA copy number || id:ebi-a-GCST90026372	TRUE	reported	igd	high	9.2622e-05	35.5214
24	6	33545125	0.021	0.0028	3.52939e-14	383476	ebi-a-GCST90026372	rs5745587	G	A	0.2247	Mitochondrial DNA copy number || id:ebi-a-GCST90026372	TRUE	reported	igd	high	0.000146663	56.2497
25	7	45161049	0.0164	0.0025	8.71365e-11	383476	ebi-a-GCST90026372	rs4720497	A	G	0.2097	Mitochondrial DNA copy number || id:ebi-a-GCST90026372	TRUE	reported	igd	high	0.000112207	43.0334
26	7	80202408	-0.012	0.0021	1.92199e-08	383476	ebi-a-GCST90026372	rs28851188	A	C	0.4533	Mitochondrial DNA copy number || id:ebi-a-GCST90026372	TRUE	reported	igd	high	8.5143e-05	32.6529
27	7	92408370	0.0207	0.0036	8.84993e-09	383476	ebi-a-GCST90026372	rs445	T	C	0.1143	Mitochondrial DNA copy number || id:ebi-a-GCST90026372	TRUE	reported	igd	high	8.62105e-05	33.0623
28	7	135289854	-0.021	0.0021	2.09894e-23	383476	ebi-a-GCST90026372	rs6959832	A	G	0.5139	Mitochondrial DNA copy number || id:ebi-a-GCST90026372	TRUE	reported	igd	high	0.000260705	99.9995
29	7	106370644	0.0283	0.0021	1.41091e-40	383476	ebi-a-GCST90026372	rs342292	G	C	0.4384	Mitochondrial DNA copy number || id:ebi-a-GCST90026372	TRUE	reported	igd	high	0.000473359	181.607
30	7	114620506	0.036	0.0036	2.07922e-23	383476	ebi-a-GCST90026372	rs77236693	T	C	0.0815	Mitochondrial DNA copy number || id:ebi-a-GCST90026372	TRUE	reported	igd	high	0.000260705	99.9995
31	8	6878257	-0.0186	0.0022	2.9662e-17	383476	ebi-a-GCST90026372	rs4284061	A	T	0.4573	Mitochondrial DNA copy number || id:ebi-a-GCST90026372	TRUE	reported	igd	high	0.000186364	71.479
32	8	9030387	0.0121	0.0021	1.088e-08	383476	ebi-a-GCST90026372	rs453301	G	T	0.4712	Mitochondrial DNA copy number || id:ebi-a-GCST90026372	TRUE	reported	igd	high	8.65678e-05	33.1994
33	8	27257787	0.0136	0.0021	1.53102e-10	383476	ebi-a-GCST90026372	rs2322718	G	T	0.4533	Mitochondrial DNA copy number || id:ebi-a-GCST90026372	TRUE	reported	igd	high	0.000109359	41.9408
34	9	4763176	0.0153	0.0021	5.95799e-13	383476	ebi-a-GCST90026372	rs385893	C	T	0.493	Mitochondrial DNA copy number || id:ebi-a-GCST90026372	TRUE	reported	igd	high	0.000138403	53.0814
35	10	60145079	0.0337	0.0021	1.27614e-55	383476	ebi-a-GCST90026372	rs12247015	G	A	0.4245	Mitochondrial DNA copy number || id:ebi-a-GCST90026372	TRUE	reported	igd	high	0.000671107	257.525
36	10	102694271	-0.0252	0.004	2.18298e-10	383476	ebi-a-GCST90026372	rs80140716	C	A	0.0477	Mitochondrial DNA copy number || id:ebi-a-GCST90026372	TRUE	reported	igd	high	0.00010349	39.6898
37	10	103852180	0.0488	0.0082	2.64698e-09	383476	ebi-a-GCST90026372	rs138055405	T	G	0.0169	Mitochondrial DNA copy number || id:ebi-a-GCST90026372	TRUE	reported	igd	high	9.23493e-05	35.4168
38	10	102757098	-0.1083	0.0081	1.08293e-40	383476	ebi-a-GCST90026372	rs73349121	C	G	0.0169	Mitochondrial DNA copy number || id:ebi-a-GCST90026372	TRUE	reported	igd	high	0.000465957	178.766
39	10	65048306	-0.0451	0.0021	9.58076e-98	383476	ebi-a-GCST90026372	rs7080386	A	C	0.4344	Mitochondrial DNA copy number || id:ebi-a-GCST90026372	TRUE	reported	igd	high	0.00120131	461.224
40	11	3894267	0.0184	0.0023	4.82614e-15	383476	ebi-a-GCST90026372	rs10835226	T	C	0.3181	Mitochondrial DNA copy number || id:ebi-a-GCST90026372	TRUE	reported	igd	high	0.000166867	63.9997
41	12	109475012	-0.0141	0.0021	4.46684e-11	383476	ebi-a-GCST90026372	rs4388979	T	G	0.6233	Mitochondrial DNA copy number || id:ebi-a-GCST90026372	TRUE	reported	igd	high	0.000117547	45.0814
42	12	122216910	0.0445	0.0032	1.45111e-43	383476	ebi-a-GCST90026372	rs11553699	G	A	0.1193	Mitochondrial DNA copy number || id:ebi-a-GCST90026372	TRUE	reported	igd	high	0.000504038	193.383
43	12	120146925	0.0255	0.004	2.58297e-10	383476	ebi-a-GCST90026372	rs11064881	A	G	0.0676	Mitochondrial DNA copy number || id:ebi-a-GCST90026372	TRUE	reported	igd	high	0.000105968	40.6404
44	12	6281039	0.0197	0.0021	4.86631e-20	383476	ebi-a-GCST90026372	rs11064074	T	C	0.4294	Mitochondrial DNA copy number || id:ebi-a-GCST90026372	TRUE	reported	igd	high	0.000229433	88.0018
45	12	19105915	0.0247	0.0022	2.66379e-29	383476	ebi-a-GCST90026372	rs5012419	G	A	0.5915	Mitochondrial DNA copy number || id:ebi-a-GCST90026372	TRUE	reported	igd	high	0.0003286	126.051
46	12	27867727	-0.0159	0.0028	1.493e-08	383476	ebi-a-GCST90026372	rs1127787	A	G	0.173	Mitochondrial DNA copy number || id:ebi-a-GCST90026372	TRUE	reported	igd	high	8.40821e-05	32.246
47	12	29435480	0.0123	0.0021	6.03101e-09	383476	ebi-a-GCST90026372	rs2015599	A	G	0.4274	Mitochondrial DNA copy number || id:ebi-a-GCST90026372	TRUE	reported	igd	high	8.94529e-05	34.3059
48	14	101181881	-0.0192	0.0027	1.24911e-12	383476	ebi-a-GCST90026372	rs72698722	T	C	0.1938	Mitochondrial DNA copy number || id:ebi-a-GCST90026372	TRUE	reported	igd	high	0.00013185	50.5676
49	14	20938251	0.0263	0.0024	5.19637e-27	383476	ebi-a-GCST90026372	rs1760940	C	A	0.2455	Mitochondrial DNA copy number || id:ebi-a-GCST90026372	TRUE	reported	igd	high	0.000313051	120.084
50	16	57006829	-0.0149	0.0027	4.13599e-08	383476	ebi-a-GCST90026372	rs289713	A	T	0.7843	Mitochondrial DNA copy number || id:ebi-a-GCST90026372	TRUE	reported	igd	high	7.94095e-05	30.4539
51	17	62476451	0.091	0.0104	1.81301e-18	383476	ebi-a-GCST90026372	rs17850455	G	C	0.0129	Mitochondrial DNA copy number || id:ebi-a-GCST90026372	TRUE	reported	igd	high	0.000199614	76.5621
52	17	18139089	0.0223	0.0031	3.63915e-13	383476	ebi-a-GCST90026372	rs2290507	A	G	0.1292	Mitochondrial DNA copy number || id:ebi-a-GCST90026372	TRUE	reported	igd	high	0.000134924	51.7469
53	17	27744033	0.0175	0.0021	1.97379e-16	383476	ebi-a-GCST90026372	rs1967556	G	T	0.5487	Mitochondrial DNA copy number || id:ebi-a-GCST90026372	TRUE	reported	igd	high	0.000181059	69.4441
54	18	42080720	0.0258	0.0031	2.53805e-16	383476	ebi-a-GCST90026372	rs11082396	C	T	0.1461	Mitochondrial DNA copy number || id:ebi-a-GCST90026372	TRUE	reported	igd	high	0.000180592	69.265
55	18	67524973	-0.0172	0.0024	1.23994e-12	383476	ebi-a-GCST90026372	rs12604328	C	T	0.2525	Mitochondrial DNA copy number || id:ebi-a-GCST90026372	TRUE	reported	igd	high	0.000133918	51.3608
56	19	5550208	-0.0191	0.0022	1.60916e-17	383476	ebi-a-GCST90026372	rs4807780	C	T	0.6571	Mitochondrial DNA copy number || id:ebi-a-GCST90026372	TRUE	reported	igd	high	0.000196516	75.3736
57	19	17390291	-0.0274	0.0023	3.18933e-32	383476	ebi-a-GCST90026372	rs4808075	C	T	0.2604	Mitochondrial DNA copy number || id:ebi-a-GCST90026372	TRUE	reported	igd	high	0.000369953	141.92
58	19	45413233	0.0388	0.0039	1.58489e-23	383476	ebi-a-GCST90026372	rs1065853	T	G	0.0626	Mitochondrial DNA copy number || id:ebi-a-GCST90026372	TRUE	reported	igd	high	0.000258038	98.9765
59	19	5711930	0.0756	0.0036	1.53993e-95	383476	ebi-a-GCST90026372	rs11085147	T	C	0.0865	Mitochondrial DNA copy number || id:ebi-a-GCST90026372	TRUE	reported	igd	high	0.00114869	440.998
60	19	11190534	0.0192	0.0033	7.38601e-09	383476	ebi-a-GCST90026372	rs142158911	A	G	0.1123	Mitochondrial DNA copy number || id:ebi-a-GCST90026372	TRUE	reported	igd	high	8.82669e-05	33.8511
61	19	55536595	-0.0167	0.0028	3.89996e-09	383476	ebi-a-GCST90026372	rs1613662	A	G	0.8549	Mitochondrial DNA copy number || id:ebi-a-GCST90026372	TRUE	reported	igd	high	9.27552e-05	35.5725
62	20	1922914	-0.0297	0.0022	5.27473e-40	383476	ebi-a-GCST90026372	rs4814778	C	G	0.3479	Mitochondrial DNA copy number || id:ebi-a-GCST90026372	TRUE	reported	igd	high	0.000475032	182.249
63	20	1541301	0.02	0.0024	1.96607e-16	383476	ebi-a-GCST90026372	rs2263663	T	C	0.2296	Mitochondrial DNA copy number || id:ebi-a-GCST90026372	TRUE	reported	igd	high	0.000181059	69.4441
64	20	1818613	0.0214	0.0022	6.41062e-23	383476	ebi-a-GCST90026372	rs156355	C	T	0.496	Mitochondrial DNA copy number || id:ebi-a-GCST90026372	TRUE	reported	igd	high	0.000246682	94.6193
65	20	17953062	0.0221	0.0021	1.62817e-25	383476	ebi-a-GCST90026372	rs8121099	C	A	0.5169	Mitochondrial DNA copy number || id:ebi-a-GCST90026372	TRUE	reported	igd	high	0.000288724	110.75
66	22	43526496	0.0317	0.0023	1.50591e-44	383476	ebi-a-GCST90026372	rs5759176	T	C	0.663	Mitochondrial DNA copy number || id:ebi-a-GCST90026372	TRUE	reported	igd	high	0.000495119	189.959
67	22	50971266	-0.0142	0.0022	2.84099e-10	383476	ebi-a-GCST90026372	rs140522	C	T	0.6799	Mitochondrial DNA copy number || id:ebi-a-GCST90026372	TRUE	reported	igd	high	0.000108629	41.6609
