# Supplementary material for: New insights from bidirectional Mendelian randomization: causal relationships between telomere length and mitochondrial DNA copy number in aging biomarkers
Source: Aging (Albany NY). 2024 Apr 24;16(8):7387–404. doi: 10.18632/aging.205765 (PMC11087129; doi:10.18632/aging.205765)
Supplement: Supplementary Table 2 [file aging-16-205765-s003.xlsx]

## Sheet: Table s2 IVs related to mtDNA c
Supplementary Table 2. IVs related to mtDNA copy number on TL as outcome.
	SNP	chr	pos	beta.outcome	se.outcome	samplesize.outcome	pval.outcome	eaf.outcome	effect_allele.outcome	other_allele.outcome	outcome	id.outcome	originalname.outcome	outcome.deprecated	mr_keep.outcome	data_source.outcome
1	rs1127787	12	27867727	-0.00106884	0.00268874	472174	0.69	0.165383	A	G	telomere length || id:ieu-b-4879	ieu-b-4879	telomere length	telomere length || ||	TRUE	igd
2	rs10835226	11	3894267	0.00580715	0.00222993	472174	0.00920005	0.285417	T	C	telomere length || id:ieu-b-4879	ieu-b-4879	telomere length	telomere length || ||	TRUE	igd
3	rs4808075	19	17390291	0.00235587	0.0022129	472174	0.29	0.287969	C	T	telomere length || id:ieu-b-4879	ieu-b-4879	telomere length	telomere length || ||	TRUE	igd
4	rs11553699	12	122216910	0.00024295	0.00309813	472174	0.94	0.130653	G	A	telomere length || id:ieu-b-4879	ieu-b-4879	telomere length	telomere length || ||	TRUE	igd
5	rs5759176	22	43526496	0.00173014	0.00214911	472174	0.42	0.662341	T	C	telomere length || id:ieu-b-4879	ieu-b-4879	telomere length	telomere length || ||	TRUE	igd
6	rs72698722	14	101181881	-3.594e-05	0.00256071	472174	0.99	0.188623	T	C	telomere length || id:ieu-b-4879	ieu-b-4879	telomere length	telomere length || ||	TRUE	igd
7	rs80140716	10	102694271	-0.010794	0.00383509	472174	0.00490004	0.075761	C	A	telomere length || id:ieu-b-4879	ieu-b-4879	telomere length	telomere length || ||	TRUE	igd
8	rs4807780	19	5550208	0.00170608	0.00214033	472174	0.43	0.6536	C	T	telomere length || id:ieu-b-4879	ieu-b-4879	telomere length	telomere length || ||	TRUE	igd
9	rs2290507	17	18139089	0.00269377	0.00290451	472174	0.35	0.137481	A	G	telomere length || id:ieu-b-4879	ieu-b-4879	telomere length	telomere length || ||	TRUE	igd
10	rs2977608	1	768253	0.0129483	0.00233716	472174	2.99999e-08	0.743949	C	A	telomere length || id:ieu-b-4879	ieu-b-4879	telomere length	telomere length || ||	TRUE	igd
11	rs6959832	7	135289854	-0.00142288	0.00200007	472174	0.48	0.502003	A	G	telomere length || id:ieu-b-4879	ieu-b-4879	telomere length	telomere length || ||	TRUE	igd
12	rs4720497	7	45161049	0.00042551	0.00238482	472174	0.86	0.232051	A	G	telomere length || id:ieu-b-4879	ieu-b-4879	telomere length	telomere length || ||	TRUE	igd
13	rs9494142	6	135431640	0.00097403	0.00233143	472174	0.68	0.245345	C	T	telomere length || id:ieu-b-4879	ieu-b-4879	telomere length	telomere length || ||	TRUE	igd
14	rs5745587	6	33545125	0.00250262	0.00257797	472174	0.33	0.186684	G	A	telomere length || id:ieu-b-4879	ieu-b-4879	telomere length	telomere length || ||	TRUE	igd
15	rs7705526	5	1285974	0.0776022	0.00216124	472174	2.39883e-282	0.326578	A	C	telomere length || id:ieu-b-4879	ieu-b-4879	telomere length	telomere length || ||	TRUE	igd
16	rs12052715	2	160677375	-0.00437225	0.00222706	472174	0.05	0.720685	G	C	telomere length || id:ieu-b-4879	ieu-b-4879	telomere length	telomere length || ||	TRUE	igd
17	rs77236693	7	114620506	0.00033814	0.00343655	472174	0.92	0.09489	T	C	telomere length || id:ieu-b-4879	ieu-b-4879	telomere length	telomere length || ||	TRUE	igd
18	rs11064074	12	6281039	0.00139304	0.00204201	472174	0.5	0.450648	T	C	telomere length || id:ieu-b-4879	ieu-b-4879	telomere length	telomere length || ||	TRUE	igd
19	rs212938	6	25522443	0.0123916	0.00240561	472174	2.59998e-07	0.777495	G	A	telomere length || id:ieu-b-4879	ieu-b-4879	telomere length	telomere length || ||	TRUE	igd
20	rs114694170	5	88180196	-0.00870001	0.00437944	472174	0.0470002	0.056338	C	T	telomere length || id:ieu-b-4879	ieu-b-4879	telomere length	telomere length || ||	TRUE	igd
21	rs10749636	1	248020448	-0.00103334	0.00235753	472174	0.66	0.753505	A	G	telomere length || id:ieu-b-4879	ieu-b-4879	telomere length	telomere length || ||	TRUE	igd
22	rs13084580	3	39188182	0.00020931	0.00315122	472174	0.95	0.112538	T	C	telomere length || id:ieu-b-4879	ieu-b-4879	telomere length	telomere length || ||	TRUE	igd
23	rs62641680	2	74166053	-0.00708583	0.0060636	472174	0.24	0.027794	A	G	telomere length || id:ieu-b-4879	ieu-b-4879	telomere length	telomere length || ||	TRUE	igd
24	rs4814778	20	1922914	0.00018186	0.00212045	472174	0.93	0.347929	C	G	telomere length || id:ieu-b-4879	ieu-b-4879	telomere length	telomere length || ||	TRUE	igd
25	rs8121099	20	17953062	-0.00360598	0.00200203	472174	0.0719996	0.543544	C	A	telomere length || id:ieu-b-4879	ieu-b-4879	telomere length	telomere length || ||	TRUE	igd
26	rs142158911	19	11190534	-0.00264248	0.00314607	472174	0.4	0.116051	A	G	telomere length || id:ieu-b-4879	ieu-b-4879	telomere length	telomere length || ||	TRUE	igd
27	rs1065853	19	45413233	-0.0195371	0.00368365	472174	1.09999e-07	0.080076	T	G	telomere length || id:ieu-b-4879	ieu-b-4879	telomere length	telomere length || ||	TRUE	igd
28	rs11085147	19	5711930	-0.00118388	0.00354814	472174	0.74	0.092397	T	C	telomere length || id:ieu-b-4879	ieu-b-4879	telomere length	telomere length || ||	TRUE	igd
29	rs140522	22	50971266	-0.0213475	0.00212419	472174	9.20026e-24	0.668994	C	T	telomere length || id:ieu-b-4879	ieu-b-4879	telomere length	telomere length || ||	TRUE	igd
30	rs1613662	19	55536595	-0.00061632	0.00267812	472174	0.82	0.832718	A	G	telomere length || id:ieu-b-4879	ieu-b-4879	telomere length	telomere length || ||	TRUE	igd
31	rs11064881	12	120146925	-0.00607906	0.00386243	472174	0.12	0.072101	A	G	telomere length || id:ieu-b-4879	ieu-b-4879	telomere length	telomere length || ||	TRUE	igd
32	rs1760940	14	20938251	-0.00636859	0.00232474	472174	0.00619998	0.24382	C	A	telomere length || id:ieu-b-4879	ieu-b-4879	telomere length	telomere length || ||	TRUE	igd
33	rs342292	7	106370644	0.00116385	0.00200931	472174	0.56	0.450228	G	C	telomere length || id:ieu-b-4879	ieu-b-4879	telomere length	telomere length || ||	TRUE	igd
34	rs7080386	10	65048306	0.00043906	0.00202809	472174	0.83	0.414651	A	C	telomere length || id:ieu-b-4879	ieu-b-4879	telomere length	telomere length || ||	TRUE	igd
35	rs4284061	8	6878257	0.00363964	0.00208623	472174	0.0810009	0.446899	A	T	telomere length || id:ieu-b-4879	ieu-b-4879	telomere length	telomere length || ||	TRUE	igd
36	rs9844549	3	179146844	0.0015766	0.00238016	472174	0.51	0.23414	G	A	telomere length || id:ieu-b-4879	ieu-b-4879	telomere length	telomere length || ||	TRUE	igd
37	rs36009521	5	72046100	0.00912381	0.00290369	472174	0.0017	0.852068	T	TA	telomere length || id:ieu-b-4879	ieu-b-4879	telomere length	telomere length || ||	TRUE	igd
38	rs74874677	2	74177777	-0.00145031	0.00680966	472174	0.83	0.021924	G	A	telomere length || id:ieu-b-4879	ieu-b-4879	telomere length	telomere length || ||	TRUE	igd
39	rs2274319	1	156450873	0.00087063	0.00209951	472174	0.68	0.652991	C	T	telomere length || id:ieu-b-4879	ieu-b-4879	telomere length	telomere length || ||	TRUE	igd
40	rs2038479	1	171939290	-0.00443797	0.00252641	472174	0.0790005	0.804384	A	C	telomere length || id:ieu-b-4879	ieu-b-4879	telomere length	telomere length || ||	TRUE	igd
41	rs72660908	1	25583610	-0.00264471	0.00205608	472174	0.2	0.391501	G	C	telomere length || id:ieu-b-4879	ieu-b-4879	telomere length	telomere length || ||	TRUE	igd
42	rs2015599	12	29435480	-0.00669002	0.0020054	472174	0.000850002	0.463871	A	G	telomere length || id:ieu-b-4879	ieu-b-4879	telomere length	telomere length || ||	TRUE	igd
43	rs1967556	17	27744033	-0.00085866	0.00202241	472174	0.67	0.537556	G	T	telomere length || id:ieu-b-4879	ieu-b-4879	telomere length	telomere length || ||	TRUE	igd
44	rs156355	20	1818613	0.00272254	0.0020742	472174	0.19	0.478168	C	T	telomere length || id:ieu-b-4879	ieu-b-4879	telomere length	telomere length || ||	TRUE	igd
45	rs10013187	4	102821550	-0.00505602	0.00200891	472174	0.012	0.537189	A	C	telomere length || id:ieu-b-4879	ieu-b-4879	telomere length	telomere length || ||	TRUE	igd
46	rs2322718	8	27257787	-0.00093046	0.00201064	472174	0.64	0.445283	G	T	telomere length || id:ieu-b-4879	ieu-b-4879	telomere length	telomere length || ||	TRUE	igd
47	rs453301	8	9030387	0.00057845	0.00200629	472174	0.77	0.499286	G	T	telomere length || id:ieu-b-4879	ieu-b-4879	telomere length	telomere length || ||	TRUE	igd
48	rs73349121	10	102757098	0.00765411	0.00739568	472174	0.3	0.018798	C	G	telomere length || id:ieu-b-4879	ieu-b-4879	telomere length	telomere length || ||	TRUE	igd
49	rs12604328	18	67524973	0.00118882	0.00229355	472174	0.6	0.257459	C	T	telomere length || id:ieu-b-4879	ieu-b-4879	telomere length	telomere length || ||	TRUE	igd
50	rs17850455	17	62476451	-0.020608	0.00999294	472174	0.0389996	0.011525	G	C	telomere length || id:ieu-b-4879	ieu-b-4879	telomere length	telomere length || ||	TRUE	igd
51	rs289713	16	57006829	-0.00182163	0.00254708	472174	0.47	0.803332	A	T	telomere length || id:ieu-b-4879	ieu-b-4879	telomere length	telomere length || ||	TRUE	igd
52	rs11082396	18	42080720	0.0309768	0.00300383	472174	6.20012e-25	0.126764	C	T	telomere length || id:ieu-b-4879	ieu-b-4879	telomere length	telomere length || ||	TRUE	igd
53	rs182346769	1	25622199	-0.00245425	0.00261324	472174	0.35	0.297416	A	G	telomere length || id:ieu-b-4879	ieu-b-4879	telomere length	telomere length || ||	TRUE	igd
54	rs1569419	1	2996602	0.00321883	0.00237659	472174	0.18	0.763383	C	T	telomere length || id:ieu-b-4879	ieu-b-4879	telomere length	telomere length || ||	TRUE	igd
55	rs4846082	1	12042443	-0.0039281	0.00200243	472174	0.05	0.472776	T	C	telomere length || id:ieu-b-4879	ieu-b-4879	telomere length	telomere length || ||	TRUE	igd
56	rs78909033	2	241510903	-0.00029869	0.00298338	472174	0.92	0.128913	A	G	telomere length || id:ieu-b-4879	ieu-b-4879	telomere length	telomere length || ||	TRUE	igd
57	rs28851188	7	80202408	-0.00164279	0.00202306	472174	0.42	0.447833	A	C	telomere length || id:ieu-b-4879	ieu-b-4879	telomere length	telomere length || ||	TRUE	igd
58	rs4388979	12	109475012	0.00219144	0.00203519	472174	0.28	0.580305	T	G	telomere length || id:ieu-b-4879	ieu-b-4879	telomere length	telomere length || ||	TRUE	igd
59	rs12247015	10	60145079	0.00073675	0.00203595	472174	0.719999	0.421873	G	A	telomere length || id:ieu-b-4879	ieu-b-4879	telomere length	telomere length || ||	TRUE	igd
60	rs138055405	10	103852180	0.0051665	0.00769293	472174	0.5	0.018414	T	G	telomere length || id:ieu-b-4879	ieu-b-4879	telomere length	telomere length || ||	TRUE	igd
61	rs5012419	12	19105915	0.00375301	0.00207743	472174	0.0710003	0.629419	G	A	telomere length || id:ieu-b-4879	ieu-b-4879	telomere length	telomere length || ||	TRUE	igd
62	rs1354034	3	56849749	-0.00256777	0.00203654	472174	0.21	0.590328	C	T	telomere length || id:ieu-b-4879	ieu-b-4879	telomere length	telomere length || ||	TRUE	igd
63	rs34778241	3	71771215	0.00324052	0.0022135	472174	0.14	0.378968	T	TG	telomere length || id:ieu-b-4879	ieu-b-4879	telomere length	telomere length || ||	TRUE	igd
64	rs2263663	20	1541301	-0.00286163	0.00232837	472174	0.22	0.244825	T	C	telomere length || id:ieu-b-4879	ieu-b-4879	telomere length	telomere length || ||	TRUE	igd
