# Supplementary material for: New insights from bidirectional Mendelian randomization: causal relationships between telomere length and mitochondrial DNA copy number in aging biomarkers
Source: Aging (Albany NY). 2024 Apr 24;16(8):7387–404. doi: 10.18632/aging.205765 (PMC11087129; doi:10.18632/aging.205765)
Supplement: Supplementary Table 3 [file aging-16-205765-s004.xlsx]

## Sheet: Table s3 IVs involved in MR ana
Supplementary Table 3. IVs involved in MR analysis between mtDNA copy number as exposure and TL as outcome.
	SNP	effect_allele.exposure	other_allele.exposure	effect_allele.outcome	other_allele.outcome	beta.exposure	beta.outcome	eaf.exposure	eaf.outcome	remove	palindromic	ambiguous	id.outcome	chr	pos	se.outcome	samplesize.outcome	pval.outcome	outcome	originalname.outcome	outcome.deprecated	mr_keep.outcome	data_source.outcome	chr.exposure	pos.exposure	se.exposure	pval.exposure	samplesize.exposure	id.exposure	exposure	mr_keep.exposure	pval_origin.exposure	data_source.exposure	action	mr_keep
1	rs10013187	A	C	A	C	-0.0121	-0.00505602	NA	0.537189	FALSE	FALSE	FALSE	ieu-b-4879	4	102821550	0.00200891	472174	0.012	telomere length || id:ieu-b-4879	telomere length	telomere length || ||	TRUE	igd	4	102821550	0.0021	9.74e-09	383476	ebi-a-GCST90026372	Mitochondrial DNA copy number || id:ebi-a-GCST90026372	TRUE	reported	igd	2	TRUE
2	rs10749636	A	G	A	G	0.0155	-0.00103334	NA	0.753505	FALSE	FALSE	FALSE	ieu-b-4879	1	248020448	0.00235753	472174	0.66	telomere length || id:ieu-b-4879	telomere length	telomere length || ||	TRUE	igd	1	248020448	0.0025	5.43e-10	383476	ebi-a-GCST90026372	Mitochondrial DNA copy number || id:ebi-a-GCST90026372	TRUE	reported	igd	2	TRUE
3	rs10835226	T	C	T	C	0.0184	0.00580715	NA	0.285417	FALSE	FALSE	FALSE	ieu-b-4879	11	3894267	0.00222993	472174	0.00920005	telomere length || id:ieu-b-4879	telomere length	telomere length || ||	TRUE	igd	11	3894267	0.0023	4.83e-15	383476	ebi-a-GCST90026372	Mitochondrial DNA copy number || id:ebi-a-GCST90026372	TRUE	reported	igd	2	TRUE
4	rs11064074	T	C	T	C	0.0197	0.00139304	NA	0.450648	FALSE	FALSE	FALSE	ieu-b-4879	12	6281039	0.00204201	472174	0.5	telomere length || id:ieu-b-4879	telomere length	telomere length || ||	TRUE	igd	12	6281039	0.0021	4.87e-20	383476	ebi-a-GCST90026372	Mitochondrial DNA copy number || id:ebi-a-GCST90026372	TRUE	reported	igd	2	TRUE
5	rs11064881	A	G	A	G	0.0255	-0.00607906	NA	0.072101	FALSE	FALSE	FALSE	ieu-b-4879	12	120146925	0.00386243	472174	0.12	telomere length || id:ieu-b-4879	telomere length	telomere length || ||	TRUE	igd	12	120146925	0.004	2.58e-10	383476	ebi-a-GCST90026372	Mitochondrial DNA copy number || id:ebi-a-GCST90026372	TRUE	reported	igd	2	TRUE
6	rs11085147	T	C	T	C	0.0756	-0.00118388	NA	0.092397	FALSE	FALSE	FALSE	ieu-b-4879	19	5711930	0.00354814	472174	0.74	telomere length || id:ieu-b-4879	telomere length	telomere length || ||	TRUE	igd	19	5711930	0.0036	1.54e-95	383476	ebi-a-GCST90026372	Mitochondrial DNA copy number || id:ebi-a-GCST90026372	TRUE	reported	igd	2	TRUE
7	rs1127787	A	G	A	G	-0.0159	-0.00106884	NA	0.165383	FALSE	FALSE	FALSE	ieu-b-4879	12	27867727	0.00268874	472174	0.69	telomere length || id:ieu-b-4879	telomere length	telomere length || ||	TRUE	igd	12	27867727	0.0028	1.49e-08	383476	ebi-a-GCST90026372	Mitochondrial DNA copy number || id:ebi-a-GCST90026372	TRUE	reported	igd	2	TRUE
8	rs114694170	C	T	C	T	0.0331	-0.00870001	NA	0.056338	FALSE	FALSE	FALSE	ieu-b-4879	5	88180196	0.00437944	472174	0.0470002	telomere length || id:ieu-b-4879	telomere length	telomere length || ||	TRUE	igd	5	88180196	0.0045	3.04e-13	383476	ebi-a-GCST90026372	Mitochondrial DNA copy number || id:ebi-a-GCST90026372	TRUE	reported	igd	2	TRUE
9	rs11553699	G	A	G	A	0.0445	0.00024295	NA	0.130653	FALSE	FALSE	FALSE	ieu-b-4879	12	122216910	0.00309813	472174	0.94	telomere length || id:ieu-b-4879	telomere length	telomere length || ||	TRUE	igd	12	122216910	0.0032	1.45e-43	383476	ebi-a-GCST90026372	Mitochondrial DNA copy number || id:ebi-a-GCST90026372	TRUE	reported	igd	2	TRUE
10	rs12247015	G	A	G	A	0.0337	0.00073675	NA	0.421873	FALSE	FALSE	FALSE	ieu-b-4879	10	60145079	0.00203595	472174	0.719999	telomere length || id:ieu-b-4879	telomere length	telomere length || ||	TRUE	igd	10	60145079	0.0021	1.28e-55	383476	ebi-a-GCST90026372	Mitochondrial DNA copy number || id:ebi-a-GCST90026372	TRUE	reported	igd	2	TRUE
11	rs12604328	C	T	C	T	-0.0172	0.00118882	NA	0.257459	FALSE	FALSE	FALSE	ieu-b-4879	18	67524973	0.00229355	472174	0.6	telomere length || id:ieu-b-4879	telomere length	telomere length || ||	TRUE	igd	18	67524973	0.0024	1.24e-12	383476	ebi-a-GCST90026372	Mitochondrial DNA copy number || id:ebi-a-GCST90026372	TRUE	reported	igd	2	TRUE
12	rs13084580	T	C	T	C	0.0244	0.00020931	NA	0.112538	FALSE	FALSE	FALSE	ieu-b-4879	3	39188182	0.00315122	472174	0.95	telomere length || id:ieu-b-4879	telomere length	telomere length || ||	TRUE	igd	3	39188182	0.0033	2.19e-13	383476	ebi-a-GCST90026372	Mitochondrial DNA copy number || id:ebi-a-GCST90026372	TRUE	reported	igd	2	TRUE
13	rs1354034	C	T	C	T	-0.0268	-0.00256777	NA	0.590328	FALSE	FALSE	FALSE	ieu-b-4879	3	56849749	0.00203654	472174	0.21	telomere length || id:ieu-b-4879	telomere length	telomere length || ||	TRUE	igd	3	56849749	0.0022	2.05e-35	383476	ebi-a-GCST90026372	Mitochondrial DNA copy number || id:ebi-a-GCST90026372	TRUE	reported	igd	2	TRUE
14	rs138055405	T	G	T	G	0.0488	0.0051665	NA	0.018414	FALSE	FALSE	FALSE	ieu-b-4879	10	103852180	0.00769293	472174	0.5	telomere length || id:ieu-b-4879	telomere length	telomere length || ||	TRUE	igd	10	103852180	0.0082	2.65e-09	383476	ebi-a-GCST90026372	Mitochondrial DNA copy number || id:ebi-a-GCST90026372	TRUE	reported	igd	2	TRUE
15	rs142158911	A	G	A	G	0.0192	-0.00264248	NA	0.116051	FALSE	FALSE	FALSE	ieu-b-4879	19	11190534	0.00314607	472174	0.4	telomere length || id:ieu-b-4879	telomere length	telomere length || ||	TRUE	igd	19	11190534	0.0033	7.39e-09	383476	ebi-a-GCST90026372	Mitochondrial DNA copy number || id:ebi-a-GCST90026372	TRUE	reported	igd	2	TRUE
16	rs156355	C	T	C	T	0.0214	0.00272254	NA	0.478168	FALSE	FALSE	FALSE	ieu-b-4879	20	1818613	0.0020742	472174	0.19	telomere length || id:ieu-b-4879	telomere length	telomere length || ||	TRUE	igd	20	1818613	0.0022	6.41e-23	383476	ebi-a-GCST90026372	Mitochondrial DNA copy number || id:ebi-a-GCST90026372	TRUE	reported	igd	2	TRUE
17	rs1569419	C	T	C	T	0.0189	0.00321883	NA	0.763383	FALSE	FALSE	FALSE	ieu-b-4879	1	2996602	0.00237659	472174	0.18	telomere length || id:ieu-b-4879	telomere length	telomere length || ||	TRUE	igd	1	2996602	0.0025	6.87e-14	383476	ebi-a-GCST90026372	Mitochondrial DNA copy number || id:ebi-a-GCST90026372	TRUE	reported	igd	2	TRUE
18	rs1613662	A	G	A	G	-0.0167	-0.00061632	NA	0.832718	FALSE	FALSE	FALSE	ieu-b-4879	19	55536595	0.00267812	472174	0.82	telomere length || id:ieu-b-4879	telomere length	telomere length || ||	TRUE	igd	19	55536595	0.0028	3.9e-09	383476	ebi-a-GCST90026372	Mitochondrial DNA copy number || id:ebi-a-GCST90026372	TRUE	reported	igd	2	TRUE
19	rs1760940	C	A	C	A	0.0263	-0.00636859	NA	0.24382	FALSE	FALSE	FALSE	ieu-b-4879	14	20938251	0.00232474	472174	0.00619998	telomere length || id:ieu-b-4879	telomere length	telomere length || ||	TRUE	igd	14	20938251	0.0024	5.2e-27	383476	ebi-a-GCST90026372	Mitochondrial DNA copy number || id:ebi-a-GCST90026372	TRUE	reported	igd	2	TRUE
20	rs182346769	A	G	A	G	0.0213	-0.00245425	NA	0.297416	FALSE	FALSE	FALSE	ieu-b-4879	1	25622199	0.00261324	472174	0.35	telomere length || id:ieu-b-4879	telomere length	telomere length || ||	TRUE	igd	1	25622199	0.0027	7.87e-15	383476	ebi-a-GCST90026372	Mitochondrial DNA copy number || id:ebi-a-GCST90026372	TRUE	reported	igd	2	TRUE
21	rs1967556	G	T	G	T	0.0175	-0.00085866	NA	0.537556	FALSE	FALSE	FALSE	ieu-b-4879	17	27744033	0.00202241	472174	0.67	telomere length || id:ieu-b-4879	telomere length	telomere length || ||	TRUE	igd	17	27744033	0.0021	1.97e-16	383476	ebi-a-GCST90026372	Mitochondrial DNA copy number || id:ebi-a-GCST90026372	TRUE	reported	igd	2	TRUE
22	rs2015599	A	G	A	G	0.0123	-0.00669002	NA	0.463871	FALSE	FALSE	FALSE	ieu-b-4879	12	29435480	0.0020054	472174	0.000850002	telomere length || id:ieu-b-4879	telomere length	telomere length || ||	TRUE	igd	12	29435480	0.0021	6.03e-09	383476	ebi-a-GCST90026372	Mitochondrial DNA copy number || id:ebi-a-GCST90026372	TRUE	reported	igd	2	TRUE
23	rs2038479	A	C	A	C	0.0162	-0.00443797	NA	0.804384	FALSE	FALSE	FALSE	ieu-b-4879	1	171939290	0.00252641	472174	0.0790005	telomere length || id:ieu-b-4879	telomere length	telomere length || ||	TRUE	igd	1	171939290	0.0027	1.47e-09	383476	ebi-a-GCST90026372	Mitochondrial DNA copy number || id:ebi-a-GCST90026372	TRUE	reported	igd	2	TRUE
24	rs2263663	T	C	T	C	0.02	-0.00286163	NA	0.244825	FALSE	FALSE	FALSE	ieu-b-4879	20	1541301	0.00232837	472174	0.22	telomere length || id:ieu-b-4879	telomere length	telomere length || ||	TRUE	igd	20	1541301	0.0024	1.97e-16	383476	ebi-a-GCST90026372	Mitochondrial DNA copy number || id:ebi-a-GCST90026372	TRUE	reported	igd	2	TRUE
25	rs2274319	C	T	C	T	-0.0139	0.00087063	NA	0.652991	FALSE	FALSE	FALSE	ieu-b-4879	1	156450873	0.00209951	472174	0.68	telomere length || id:ieu-b-4879	telomere length	telomere length || ||	TRUE	igd	1	156450873	0.0022	4.09e-10	383476	ebi-a-GCST90026372	Mitochondrial DNA copy number || id:ebi-a-GCST90026372	TRUE	reported	igd	2	TRUE
26	rs2290507	A	G	A	G	0.0223	0.00269377	NA	0.137481	FALSE	FALSE	FALSE	ieu-b-4879	17	18139089	0.00290451	472174	0.35	telomere length || id:ieu-b-4879	telomere length	telomere length || ||	TRUE	igd	17	18139089	0.0031	3.64e-13	383476	ebi-a-GCST90026372	Mitochondrial DNA copy number || id:ebi-a-GCST90026372	TRUE	reported	igd	2	TRUE
27	rs2322718	G	T	G	T	0.0136	-0.00093046	NA	0.445283	FALSE	FALSE	FALSE	ieu-b-4879	8	27257787	0.00201064	472174	0.64	telomere length || id:ieu-b-4879	telomere length	telomere length || ||	TRUE	igd	8	27257787	0.0021	1.53e-10	383476	ebi-a-GCST90026372	Mitochondrial DNA copy number || id:ebi-a-GCST90026372	TRUE	reported	igd	2	TRUE
28	rs28851188	A	C	A	C	-0.012	-0.00164279	NA	0.447833	FALSE	FALSE	FALSE	ieu-b-4879	7	80202408	0.00202306	472174	0.42	telomere length || id:ieu-b-4879	telomere length	telomere length || ||	TRUE	igd	7	80202408	0.0021	1.92e-08	383476	ebi-a-GCST90026372	Mitochondrial DNA copy number || id:ebi-a-GCST90026372	TRUE	reported	igd	2	TRUE
29	rs34778241	TG	T	TG	T	0.014	-0.00324052	NA	0.621032	FALSE	FALSE	FALSE	ieu-b-4879	3	71771215	0.0022135	472174	0.14	telomere length || id:ieu-b-4879	telomere length	telomere length || ||	TRUE	igd	3	71771215	0.0023	2.02e-09	383476	ebi-a-GCST90026372	Mitochondrial DNA copy number || id:ebi-a-GCST90026372	TRUE	reported	igd	2	TRUE
30	rs36009521	T	TA	T	TA	-0.0181	0.00912381	NA	0.852068	FALSE	FALSE	FALSE	ieu-b-4879	5	72046100	0.00290369	472174	0.0017	telomere length || id:ieu-b-4879	telomere length	telomere length || ||	TRUE	igd	5	72046100	0.0031	6.27e-09	383476	ebi-a-GCST90026372	Mitochondrial DNA copy number || id:ebi-a-GCST90026372	TRUE	reported	igd	2	TRUE
31	rs4388979	T	G	T	G	-0.0141	0.00219144	NA	0.580305	FALSE	FALSE	FALSE	ieu-b-4879	12	109475012	0.00203519	472174	0.28	telomere length || id:ieu-b-4879	telomere length	telomere length || ||	TRUE	igd	12	109475012	0.0021	4.47e-11	383476	ebi-a-GCST90026372	Mitochondrial DNA copy number || id:ebi-a-GCST90026372	TRUE	reported	igd	2	TRUE
32	rs453301	G	T	G	T	0.0121	0.00057845	NA	0.499286	FALSE	FALSE	FALSE	ieu-b-4879	8	9030387	0.00200629	472174	0.77	telomere length || id:ieu-b-4879	telomere length	telomere length || ||	TRUE	igd	8	9030387	0.0021	1.09e-08	383476	ebi-a-GCST90026372	Mitochondrial DNA copy number || id:ebi-a-GCST90026372	TRUE	reported	igd	2	TRUE
33	rs4720497	A	G	A	G	0.0164	0.00042551	NA	0.232051	FALSE	FALSE	FALSE	ieu-b-4879	7	45161049	0.00238482	472174	0.86	telomere length || id:ieu-b-4879	telomere length	telomere length || ||	TRUE	igd	7	45161049	0.0025	8.71e-11	383476	ebi-a-GCST90026372	Mitochondrial DNA copy number || id:ebi-a-GCST90026372	TRUE	reported	igd	2	TRUE
34	rs4807780	C	T	C	T	-0.0191	0.00170608	NA	0.6536	FALSE	FALSE	FALSE	ieu-b-4879	19	5550208	0.00214033	472174	0.43	telomere length || id:ieu-b-4879	telomere length	telomere length || ||	TRUE	igd	19	5550208	0.0022	1.61e-17	383476	ebi-a-GCST90026372	Mitochondrial DNA copy number || id:ebi-a-GCST90026372	TRUE	reported	igd	2	TRUE
35	rs4808075	C	T	C	T	-0.0274	0.00235587	NA	0.287969	FALSE	FALSE	FALSE	ieu-b-4879	19	17390291	0.0022129	472174	0.29	telomere length || id:ieu-b-4879	telomere length	telomere length || ||	TRUE	igd	19	17390291	0.0023	3.19e-32	383476	ebi-a-GCST90026372	Mitochondrial DNA copy number || id:ebi-a-GCST90026372	TRUE	reported	igd	2	TRUE
36	rs4846082	T	C	T	C	-0.0179	-0.0039281	NA	0.472776	FALSE	FALSE	FALSE	ieu-b-4879	1	12042443	0.00200243	472174	0.05	telomere length || id:ieu-b-4879	telomere length	telomere length || ||	TRUE	igd	1	12042443	0.0021	3.33e-17	383476	ebi-a-GCST90026372	Mitochondrial DNA copy number || id:ebi-a-GCST90026372	TRUE	reported	igd	2	TRUE
37	rs5012419	G	A	G	A	0.0247	0.00375301	NA	0.629419	FALSE	FALSE	FALSE	ieu-b-4879	12	19105915	0.00207743	472174	0.0710003	telomere length || id:ieu-b-4879	telomere length	telomere length || ||	TRUE	igd	12	19105915	0.0022	2.66e-29	383476	ebi-a-GCST90026372	Mitochondrial DNA copy number || id:ebi-a-GCST90026372	TRUE	reported	igd	2	TRUE
38	rs5745587	G	A	G	A	0.021	0.00250262	NA	0.186684	FALSE	FALSE	FALSE	ieu-b-4879	6	33545125	0.00257797	472174	0.33	telomere length || id:ieu-b-4879	telomere length	telomere length || ||	TRUE	igd	6	33545125	0.0028	3.53e-14	383476	ebi-a-GCST90026372	Mitochondrial DNA copy number || id:ebi-a-GCST90026372	TRUE	reported	igd	2	TRUE
39	rs5759176	T	C	T	C	0.0317	0.00173014	NA	0.662341	FALSE	FALSE	FALSE	ieu-b-4879	22	43526496	0.00214911	472174	0.42	telomere length || id:ieu-b-4879	telomere length	telomere length || ||	TRUE	igd	22	43526496	0.0023	1.51e-44	383476	ebi-a-GCST90026372	Mitochondrial DNA copy number || id:ebi-a-GCST90026372	TRUE	reported	igd	2	TRUE
40	rs62641680	A	G	A	G	-0.0903	-0.00708583	NA	0.027794	FALSE	FALSE	FALSE	ieu-b-4879	2	74166053	0.0060636	472174	0.24	telomere length || id:ieu-b-4879	telomere length	telomere length || ||	TRUE	igd	2	74166053	0.0063	4.63e-47	383476	ebi-a-GCST90026372	Mitochondrial DNA copy number || id:ebi-a-GCST90026372	TRUE	reported	igd	2	TRUE
41	rs6959832	A	G	A	G	-0.021	-0.00142288	NA	0.502003	FALSE	FALSE	FALSE	ieu-b-4879	7	135289854	0.00200007	472174	0.48	telomere length || id:ieu-b-4879	telomere length	telomere length || ||	TRUE	igd	7	135289854	0.0021	2.1e-23	383476	ebi-a-GCST90026372	Mitochondrial DNA copy number || id:ebi-a-GCST90026372	TRUE	reported	igd	2	TRUE
42	rs7080386	A	C	A	C	-0.0451	0.00043906	NA	0.414651	FALSE	FALSE	FALSE	ieu-b-4879	10	65048306	0.00202809	472174	0.83	telomere length || id:ieu-b-4879	telomere length	telomere length || ||	TRUE	igd	10	65048306	0.0021	9.58e-98	383476	ebi-a-GCST90026372	Mitochondrial DNA copy number || id:ebi-a-GCST90026372	TRUE	reported	igd	2	TRUE
43	rs72698722	T	C	T	C	-0.0192	-3.59e-05	NA	0.188623	FALSE	FALSE	FALSE	ieu-b-4879	14	101181881	0.00256071	472174	0.99	telomere length || id:ieu-b-4879	telomere length	telomere length || ||	TRUE	igd	14	101181881	0.0027	1.25e-12	383476	ebi-a-GCST90026372	Mitochondrial DNA copy number || id:ebi-a-GCST90026372	TRUE	reported	igd	2	TRUE
44	rs74874677	G	A	G	A	-0.0819	-0.00145031	NA	0.021924	FALSE	FALSE	FALSE	ieu-b-4879	2	74177777	0.00680966	472174	0.83	telomere length || id:ieu-b-4879	telomere length	telomere length || ||	TRUE	igd	2	74177777	0.0071	3.62e-31	383476	ebi-a-GCST90026372	Mitochondrial DNA copy number || id:ebi-a-GCST90026372	TRUE	reported	igd	2	TRUE
45	rs77236693	T	C	T	C	0.036	0.00033814	NA	0.09489	FALSE	FALSE	FALSE	ieu-b-4879	7	114620506	0.00343655	472174	0.92	telomere length || id:ieu-b-4879	telomere length	telomere length || ||	TRUE	igd	7	114620506	0.0036	2.08e-23	383476	ebi-a-GCST90026372	Mitochondrial DNA copy number || id:ebi-a-GCST90026372	TRUE	reported	igd	2	TRUE
46	rs78909033	A	G	A	G	-0.021	-0.00029869	NA	0.128913	FALSE	FALSE	FALSE	ieu-b-4879	2	241510903	0.00298338	472174	0.92	telomere length || id:ieu-b-4879	telomere length	telomere length || ||	TRUE	igd	2	241510903	0.0031	1e-11	383476	ebi-a-GCST90026372	Mitochondrial DNA copy number || id:ebi-a-GCST90026372	TRUE	reported	igd	2	TRUE
47	rs80140716	C	A	C	A	-0.0252	-0.010794	NA	0.075761	FALSE	FALSE	FALSE	ieu-b-4879	10	102694271	0.00383509	472174	0.00490004	telomere length || id:ieu-b-4879	telomere length	telomere length || ||	TRUE	igd	10	102694271	0.004	2.18e-10	383476	ebi-a-GCST90026372	Mitochondrial DNA copy number || id:ebi-a-GCST90026372	TRUE	reported	igd	2	TRUE
48	rs8121099	C	A	C	A	0.0221	-0.00360598	NA	0.543544	FALSE	FALSE	FALSE	ieu-b-4879	20	17953062	0.00200203	472174	0.0719996	telomere length || id:ieu-b-4879	telomere length	telomere length || ||	TRUE	igd	20	17953062	0.0021	1.63e-25	383476	ebi-a-GCST90026372	Mitochondrial DNA copy number || id:ebi-a-GCST90026372	TRUE	reported	igd	2	TRUE
49	rs9494142	C	T	C	T	0.018	0.00097403	NA	0.245345	FALSE	FALSE	FALSE	ieu-b-4879	6	135431640	0.00233143	472174	0.68	telomere length || id:ieu-b-4879	telomere length	telomere length || ||	TRUE	igd	6	135431640	0.0024	1.93e-13	383476	ebi-a-GCST90026372	Mitochondrial DNA copy number || id:ebi-a-GCST90026372	TRUE	reported	igd	2	TRUE
50	rs9844549	G	A	G	A	0.0171	0.0015766	NA	0.23414	FALSE	FALSE	FALSE	ieu-b-4879	3	179146844	0.00238016	472174	0.51	telomere length || id:ieu-b-4879	telomere length	telomere length || ||	TRUE	igd	3	179146844	0.0025	1.16e-11	383476	ebi-a-GCST90026372	Mitochondrial DNA copy number || id:ebi-a-GCST90026372	TRUE	reported	igd	2	TRUE
51	rs12052715	G	C	G	C	-0.0133	-0.00437225	NA	0.720685	FALSE	TRUE	TRUE	ieu-b-4879	2	160677375	0.00222706	472174	0.05	telomere length || id:ieu-b-4879	telomere length	telomere length || ||	TRUE	igd	2	160677375	0.0024	1.72e-08	383476	ebi-a-GCST90026372	Mitochondrial DNA copy number || id:ebi-a-GCST90026372	TRUE	reported	igd	2	FALSE
52	rs17850455	G	C	G	C	0.091	-0.020608	NA	0.011525	FALSE	TRUE	TRUE	ieu-b-4879	17	62476451	0.00999294	472174	0.0389996	telomere length || id:ieu-b-4879	telomere length	telomere length || ||	TRUE	igd	17	62476451	0.0104	1.81e-18	383476	ebi-a-GCST90026372	Mitochondrial DNA copy number || id:ebi-a-GCST90026372	TRUE	reported	igd	2	FALSE
53	rs289713	A	T	A	T	-0.0149	-0.00182163	NA	0.803332	FALSE	TRUE	TRUE	ieu-b-4879	16	57006829	0.00254708	472174	0.47	telomere length || id:ieu-b-4879	telomere length	telomere length || ||	TRUE	igd	16	57006829	0.0027	4.14e-08	383476	ebi-a-GCST90026372	Mitochondrial DNA copy number || id:ebi-a-GCST90026372	TRUE	reported	igd	2	FALSE
54	rs342292	G	C	G	C	0.0283	0.00116385	NA	0.450228	FALSE	TRUE	TRUE	ieu-b-4879	7	106370644	0.00200931	472174	0.56	telomere length || id:ieu-b-4879	telomere length	telomere length || ||	TRUE	igd	7	106370644	0.0021	1.41e-40	383476	ebi-a-GCST90026372	Mitochondrial DNA copy number || id:ebi-a-GCST90026372	TRUE	reported	igd	2	FALSE
55	rs4284061	A	T	A	T	-0.0186	0.00363964	NA	0.446899	FALSE	TRUE	TRUE	ieu-b-4879	8	6878257	0.00208623	472174	0.0810009	telomere length || id:ieu-b-4879	telomere length	telomere length || ||	TRUE	igd	8	6878257	0.0022	2.97e-17	383476	ebi-a-GCST90026372	Mitochondrial DNA copy number || id:ebi-a-GCST90026372	TRUE	reported	igd	2	FALSE
56	rs4814778	C	G	C	G	-0.0297	0.00018186	NA	0.347929	FALSE	TRUE	TRUE	ieu-b-4879	20	1922914	0.00212045	472174	0.93	telomere length || id:ieu-b-4879	telomere length	telomere length || ||	TRUE	igd	20	1922914	0.0022	5.27e-40	383476	ebi-a-GCST90026372	Mitochondrial DNA copy number || id:ebi-a-GCST90026372	TRUE	reported	igd	2	FALSE
57	rs72660908	G	C	G	C	0.0457	-0.00264471	NA	0.391501	FALSE	TRUE	TRUE	ieu-b-4879	1	25583610	0.00205608	472174	0.2	telomere length || id:ieu-b-4879	telomere length	telomere length || ||	TRUE	igd	1	25583610	0.0021	8.24e-101	383476	ebi-a-GCST90026372	Mitochondrial DNA copy number || id:ebi-a-GCST90026372	TRUE	reported	igd	2	FALSE
58	rs73349121	C	G	C	G	-0.1083	0.00765411	NA	0.018798	FALSE	TRUE	TRUE	ieu-b-4879	10	102757098	0.00739568	472174	0.3	telomere length || id:ieu-b-4879	telomere length	telomere length || ||	TRUE	igd	10	102757098	0.0081	1.08e-40	383476	ebi-a-GCST90026372	Mitochondrial DNA copy number || id:ebi-a-GCST90026372	TRUE	reported	igd	2	FALSE
