# Supplementary material for: New insights from bidirectional Mendelian randomization: causal relationships between telomere length and mitochondrial DNA copy number in aging biomarkers
Source: Aging (Albany NY). 2024 Apr 24;16(8):7387–404. doi: 10.18632/aging.205765 (PMC11087129; doi:10.18632/aging.205765)
Supplement: Supplementary Table 4 [file aging-16-205765-s005.xlsx]

## Sheet: Table s4 IVs related to TL as e
Supplementary Table 4. IVs related to TL as exposure including F value.
	chr.exposure	pos.exposure	beta.exposure	se.exposure	pval.exposure	samplesize.exposure	id.exposure	SNP	effect_allele.exposure	other_allele.exposure	eaf.exposure	exposure	mr_keep.exposure	pval_origin.exposure	data_source.exposure	r2	F
1	1	41231032	0.0134472	0.00238826	1.79999e-08	472174	ieu-b-4879	rs3767952	A	G	0.226709	telomere length || id:ieu-b-4879	TRUE	reported	igd	6.71381e-05	31.7029
2	1	110910397	0.0150601	0.00200376	5.70033e-14	472174	ieu-b-4879	rs4498805	T	G	0.546632	telomere length || id:ieu-b-4879	TRUE	reported	igd	0.000119622	56.4888
3	1	226577306	-0.0402052	0.00279667	7.29962e-47	472174	ieu-b-4879	rs932002	T	C	0.150843	telomere length || id:ieu-b-4879	TRUE	reported	igd	0.000437512	206.671
4	1	20916238	-0.0177791	0.00215421	1.50003e-16	472174	ieu-b-4879	rs66731853	A	G	0.317304	telomere length || id:ieu-b-4879	TRUE	reported	igd	0.000144238	68.1148
5	1	114419489	-0.0306517	0.00263623	2.99985e-31	472174	ieu-b-4879	rs11584821	T	C	0.176208	telomere length || id:ieu-b-4879	TRUE	reported	igd	0.000286231	135.189
6	1	185315067	-0.0117091	0.00205167	1.09999e-08	472174	ieu-b-4879	rs6659669	T	C	0.605095	telomere length || id:ieu-b-4879	TRUE	reported	igd	6.89763e-05	32.5709
7	1	768253	0.0129483	0.00233716	2.99999e-08	472174	ieu-b-4879	rs2977608	C	A	0.743949	telomere length || id:ieu-b-4879	TRUE	reported	igd	6.50007e-05	30.6935
8	1	32279629	0.0182358	0.00202476	2.09991e-19	472174	ieu-b-4879	rs6669563	A	G	0.437768	telomere length || id:ieu-b-4879	TRUE	reported	igd	0.000171762	81.1149
9	1	94322469	0.0272605	0.00498872	4.60002e-08	472174	ieu-b-4879	rs145114957	G	C	0.042648	telomere length || id:ieu-b-4879	TRUE	reported	igd	6.32353e-05	29.8598
10	1	45252015	0.0153617	0.0025499	1.7e-09	472174	ieu-b-4879	rs41269079	A	T	0.188991	telomere length || id:ieu-b-4879	TRUE	reported	igd	7.68594e-05	36.2936
11	1	92842367	0.0599379	0.00873247	6.70039e-12	472174	ieu-b-4879	rs139795227	C	A	0.014021	telomere length || id:ieu-b-4879	TRUE	reported	igd	9.97662e-05	47.1115
12	1	146741960	0.0265113	0.00357752	1.29987e-13	472174	ieu-b-4879	rs11579626	C	A	0.084882	telomere length || id:ieu-b-4879	TRUE	reported	igd	0.000116291	54.9156
13	1	151402045	-0.0182148	0.0026359	4.79954e-12	472174	ieu-b-4879	rs6587577	G	A	0.826346	telomere length || id:ieu-b-4879	TRUE	reported	igd	0.000101122	47.7517
14	2	43588302	-0.0140465	0.00248465	1.6e-08	472174	ieu-b-4879	rs6751209	C	T	0.204231	telomere length || id:ieu-b-4879	TRUE	reported	igd	6.76822e-05	31.9598
15	2	54473646	0.0403062	0.00543604	1.20005e-13	472174	ieu-b-4879	rs188918174	T	C	0.036106	telomere length || id:ieu-b-4879	TRUE	reported	igd	0.00011642	54.9764
16	2	54488018	0.102784	0.00650108	2.60016e-56	472174	ieu-b-4879	rs202034370	T	TA	0.97541	telomere length || id:ieu-b-4879	TRUE	reported	igd	0.000529113	249.964
17	2	29098543	0.0143739	0.00201464	9.70063e-13	472174	ieu-b-4879	rs56178008	A	T	0.437497	telomere length || id:ieu-b-4879	TRUE	reported	igd	0.000107797	50.9041
18	2	54622978	-0.0265863	0.00422973	3.29997e-10	472174	ieu-b-4879	rs376641875	C	CATAA	0.928873	telomere length || id:ieu-b-4879	TRUE	reported	igd	8.36666e-05	39.5083
19	2	210673445	0.0273203	0.00203482	4.19952e-41	472174	ieu-b-4879	rs17803849	T	C	0.405161	telomere length || id:ieu-b-4879	TRUE	reported	igd	0.000381638	180.267
20	2	17841243	-0.0139717	0.00203498	6.59933e-12	472174	ieu-b-4879	rs2555104	C	A	0.434255	telomere length || id:ieu-b-4879	TRUE	reported	igd	9.98235e-05	47.1386
21	2	58979879	0.0177942	0.00290595	9.20005e-10	472174	ieu-b-4879	rs77732866	A	G	0.137597	telomere length || id:ieu-b-4879	TRUE	reported	igd	7.94043e-05	37.4955
22	3	49936102	-0.0158022	0.00200806	3.59998e-15	472174	ieu-b-4879	rs2230590	C	T	0.510897	telomere length || id:ieu-b-4879	TRUE	reported	igd	0.000131136	61.927
23	3	72891547	-0.0756311	0.00741168	1.9002e-24	472174	ieu-b-4879	rs78491606	C	A	0.018433	telomere length || id:ieu-b-4879	TRUE	reported	igd	0.00022048	104.128
24	3	138244400	-0.0143407	0.00201819	1.20005e-12	472174	ieu-b-4879	rs9878436	T	C	0.434393	telomere length || id:ieu-b-4879	TRUE	reported	igd	0.000106922	50.4911
25	3	169486508	-0.0940025	0.00232918	1e-200	472174	ieu-b-4879	rs35446936	A	G	0.243674	telomere length || id:ieu-b-4879	TRUE	reported	igd	0.00343776	1628.81
26	3	197842892	-0.0198961	0.00281641	1.59993e-12	472174	ieu-b-4879	rs112394943	C	T	0.162741	telomere length || id:ieu-b-4879	TRUE	reported	igd	0.000105681	49.9048
27	3	101267385	0.0138552	0.00214113	9.70063e-11	472174	ieu-b-4879	rs13062095	C	T	0.327843	telomere length || id:ieu-b-4879	TRUE	reported	igd	8.86745e-05	41.8733
28	3	160042459	-0.0173476	0.00200198	4.49987e-18	472174	ieu-b-4879	rs4616688	T	G	0.525394	telomere length || id:ieu-b-4879	TRUE	reported	igd	0.000158997	75.0857
29	3	170263320	0.0145728	0.00228428	1.79999e-10	472174	ieu-b-4879	rs6790988	G	A	0.741902	telomere length || id:ieu-b-4879	TRUE	reported	igd	8.61882e-05	40.6992
30	3	24347800	-0.0147303	0.00212801	4.40048e-12	472174	ieu-b-4879	rs869785	C	T	0.672471	telomere length || id:ieu-b-4879	TRUE	reported	igd	0.000101468	47.9153
31	3	128215821	-0.0174439	0.00203747	1.10002e-17	472174	ieu-b-4879	rs6776756	A	G	0.597562	telomere length || id:ieu-b-4879	TRUE	reported	igd	0.000155216	73.2998
32	3	128318179	-0.0115882	0.0020709	2.19999e-08	472174	ieu-b-4879	rs11426156	T	TA	0.399525	telomere length || id:ieu-b-4879	TRUE	reported	igd	6.63106e-05	31.3121
33	4	122729413	0.014467	0.00205607	1.99986e-12	472174	ieu-b-4879	rs35500378	CACTT	C	0.610542	telomere length || id:ieu-b-4879	TRUE	reported	igd	0.000104842	49.5085
34	4	9920347	0.0117072	0.00202147	7.00003e-09	472174	ieu-b-4879	rs10805346	C	T	0.439339	telomere length || id:ieu-b-4879	TRUE	reported	igd	7.10295e-05	33.5405
35	4	164028105	0.0534148	0.00238875	9.39723e-111	472174	ieu-b-4879	rs6536702	A	G	0.774647	telomere length || id:ieu-b-4879	TRUE	reported	igd	0.00105784	500.011
36	4	7044380	-0.0182986	0.0020263	1.69981e-19	472174	ieu-b-4879	rs871134	T	C	0.569032	telomere length || id:ieu-b-4879	TRUE	reported	igd	0.000172684	81.5505
37	4	48843372	0.0141511	0.00199925	1.50003e-12	472174	ieu-b-4879	rs4695407	G	A	0.507843	telomere length || id:ieu-b-4879	TRUE	reported	igd	0.000106096	50.1008
38	4	2255063	-0.0224234	0.00289392	9.30037e-15	472174	ieu-b-4879	rs2282764	G	A	0.142384	telomere length || id:ieu-b-4879	TRUE	reported	igd	0.000127137	60.0383
39	5	1285974	0.0776022	0.00216124	1e-200	472174	ieu-b-4879	rs7705526	A	C	0.326578	telomere length || id:ieu-b-4879	TRUE	reported	igd	0.00272305	1289.26
40	5	77973	0.0273632	0.00439272	4.70002e-10	472174	ieu-b-4879	rs73730598	A	G	0.054793	telomere length || id:ieu-b-4879	TRUE	reported	igd	8.2173e-05	38.803
41	5	1294166	-0.059181	0.00595394	2.80027e-23	472174	ieu-b-4879	rs61748181	T	C	0.028928	telomere length || id:ieu-b-4879	TRUE	reported	igd	0.000209201	98.7993
42	5	1670265	0.0169256	0.00207735	3.69999e-16	472174	ieu-b-4879	rs6881568	A	C	0.36258	telomere length || id:ieu-b-4879	TRUE	reported	igd	0.000140574	66.3845
43	5	132397351	-0.0211612	0.00375164	1.7e-08	472174	ieu-b-4879	rs55747751	A	G	0.077375	telomere length || id:ieu-b-4879	TRUE	reported	igd	6.73763e-05	31.8153
44	5	138914024	0.0372806	0.00435145	1.10002e-17	472174	ieu-b-4879	rs185174247	A	G	0.05609	telomere length || id:ieu-b-4879	TRUE	reported	igd	0.000155428	73.4
45	5	78954683	-0.0246687	0.00335723	1.99986e-13	472174	ieu-b-4879	rs141214782	TTATC	T	0.101206	telomere length || id:ieu-b-4879	TRUE	reported	igd	0.000114335	53.9919
46	5	1415068	0.0755557	0.00959987	3.50026e-15	472174	ieu-b-4879	rs28363070	A	G	0.013389	telomere length || id:ieu-b-4879	TRUE	reported	igd	0.000131173	61.9444
47	6	29748690	-0.0160135	0.00213359	6.09958e-14	472174	ieu-b-4879	rs1611236	A	G	0.32687	telomere length || id:ieu-b-4879	TRUE	reported	igd	0.000119288	56.3312
48	6	26360443	0.0216931	0.00301569	6.29941e-13	472174	ieu-b-4879	rs142730696	TTTTTC	T	0.864083	telomere length || id:ieu-b-4879	TRUE	reported	igd	0.000109577	51.745
49	6	28674322	0.017549	0.00200003	1.69981e-18	472174	ieu-b-4879	rs7772289	T	G	0.503081	telomere length || id:ieu-b-4879	TRUE	reported	igd	0.000163027	76.9892
50	6	31794592	-0.0277713	0.00208092	1.29987e-40	472174	ieu-b-4879	rs2763979	T	C	0.359721	telomere length || id:ieu-b-4879	TRUE	reported	igd	0.000377065	178.107
51	6	204031	0.0396515	0.00466286	1.80011e-17	472174	ieu-b-4879	rs80324517	A	G	0.048259	telomere length || id:ieu-b-4879	TRUE	reported	igd	0.000153125	72.3124
52	6	29877483	-0.0181748	0.00217477	6.4003e-17	472174	ieu-b-4879	rs201558190	C	T	0.363271	telomere length || id:ieu-b-4879	TRUE	reported	igd	0.000147893	69.8411
53	6	109601554	-0.0143586	0.00201175	9.49948e-13	472174	ieu-b-4879	rs9398196	G	A	0.52005	telomere length || id:ieu-b-4879	TRUE	reported	igd	0.000107877	50.9418
54	7	67200	-0.0501874	0.00602955	8.49963e-17	472174	ieu-b-4879	rs61405042	T	C	0.029288	telomere length || id:ieu-b-4879	TRUE	reported	igd	0.000146708	69.2816
55	7	76310784	-0.012942	0.002056	3.09999e-10	472174	ieu-b-4879	rs2538745	C	T	0.602841	telomere length || id:ieu-b-4879	TRUE	reported	igd	8.39108e-05	39.6237
56	7	159117178	0.0450533	0.00611706	1.80011e-13	472174	ieu-b-4879	rs117407747	T	C	0.027571	telomere length || id:ieu-b-4879	TRUE	reported	igd	0.000114872	54.2458
57	7	159119220	-0.0311893	0.00300952	3.59998e-25	472174	ieu-b-4879	rs1985369	G	A	0.868178	telomere length || id:ieu-b-4879	TRUE	reported	igd	0.000227413	107.403
58	7	23930316	-0.0173277	0.00232377	8.9002e-14	472174	ieu-b-4879	rs13230646	C	T	0.248945	telomere length || id:ieu-b-4879	TRUE	reported	igd	0.000117745	55.6024
59	7	50257703	-0.0256807	0.00389475	4.30031e-11	472174	ieu-b-4879	rs11769630	A	T	0.072227	telomere length || id:ieu-b-4879	TRUE	reported	igd	9.20688e-05	43.4763
60	7	99780283	-0.0228078	0.00243638	7.89951e-21	472174	ieu-b-4879	rs2056726	A	G	0.214376	telomere length || id:ieu-b-4879	TRUE	reported	igd	0.000185564	87.6345
61	7	124459852	-0.0437199	0.00220526	1.80011e-87	472174	ieu-b-4879	rs7790856	T	C	0.289139	telomere length || id:ieu-b-4879	TRUE	reported	igd	0.000831716	393.04
62	7	128678236	-0.0206119	0.00205962	1.39991e-23	472174	ieu-b-4879	rs4731541	G	C	0.624901	telomere length || id:ieu-b-4879	TRUE	reported	igd	0.000212064	100.152
63	7	124779510	0.059565	0.00720413	1.39991e-16	472174	ieu-b-4879	rs117630647	A	G	0.021346	telomere length || id:ieu-b-4879	TRUE	reported	igd	0.000144762	68.3624
64	8	21846586	-0.0209417	0.00201898	3.29989e-25	472174	ieu-b-4879	rs2306646	C	G	0.559475	telomere length || id:ieu-b-4879	TRUE	reported	igd	0.000227803	107.587
65	8	48885436	0.0310104	0.00285024	1.39991e-27	472174	ieu-b-4879	rs762679	A	T	0.856501	telomere length || id:ieu-b-4879	TRUE	reported	igd	0.000250635	118.372
66	8	56664524	-0.030138	0.00318686	3.19963e-21	472174	ieu-b-4879	rs11991877	A	T	0.889309	telomere length || id:ieu-b-4879	TRUE	reported	igd	0.000189373	89.4337
67	8	73958718	-0.0287522	0.00202518	9.49948e-46	472174	ieu-b-4879	rs10112752	A	G	0.430369	telomere length || id:ieu-b-4879	TRUE	reported	igd	0.000426705	201.564
68	8	95530969	-0.0183732	0.00234772	5.00035e-15	472174	ieu-b-4879	rs1023767	A	G	0.237595	telomere length || id:ieu-b-4879	TRUE	reported	igd	0.000129694	61.2456
69	9	826585	0.0154567	0.00206109	6.4003e-14	472174	ieu-b-4879	rs34896435	G	C	0.469158	telomere length || id:ieu-b-4879	TRUE	reported	igd	0.000119093	56.239
70	9	34107505	-0.0343719	0.00298538	1.10002e-30	472174	ieu-b-4879	rs11557154	T	C	0.13003	telomere length || id:ieu-b-4879	TRUE	reported	igd	0.000280662	132.558
71	9	109639970	0.0147971	0.00238094	5.1e-10	472174	ieu-b-4879	rs4743037	T	C	0.230874	telomere length || id:ieu-b-4879	TRUE	reported	igd	8.17935e-05	38.6238
72	10	103855348	0.0374377	0.00667898	2.1e-08	472174	ieu-b-4879	rs117034449	A	G	0.023304	telomere length || id:ieu-b-4879	TRUE	reported	igd	6.65376e-05	31.4193
73	10	96134685	-0.0153288	0.00224403	8.4004e-12	472174	ieu-b-4879	rs7099229	A	G	0.273301	telomere length || id:ieu-b-4879	TRUE	reported	igd	9.8813e-05	46.6613
74	10	101276256	-0.0245174	0.00222685	3.40017e-28	472174	ieu-b-4879	rs12412214	A	G	0.279765	telomere length || id:ieu-b-4879	TRUE	reported	igd	0.000256657	121.217
75	10	105645725	0.0114923	0.00204674	2e-08	472174	ieu-b-4879	rs6584579	G	A	0.398876	telomere length || id:ieu-b-4879	TRUE	reported	igd	6.67663e-05	31.5273
76	10	105675946	-0.0810098	0.00293847	2.60016e-167	472174	ieu-b-4879	rs9419958	C	T	0.86139	telomere length || id:ieu-b-4879	TRUE	reported	igd	0.00160706	760.03
77	10	106280527	0.0989303	0.0134649	1.99986e-13	472174	ieu-b-4879	rs77231040	C	G	0.005742	telomere length || id:ieu-b-4879	TRUE	reported	igd	0.000114314	53.9822
78	10	5870267	-0.0182493	0.00203099	2.60016e-19	472174	ieu-b-4879	rs10905255	T	G	0.57919	telomere length || id:ieu-b-4879	TRUE	reported	igd	0.000170962	80.7374
79	11	202253	0.0241795	0.00216724	6.59933e-29	472174	ieu-b-4879	rs939916	A	G	0.669967	telomere length || id:ieu-b-4879	TRUE	reported	igd	0.000263551	124.474
80	11	9629553	0.014383	0.00212494	1.29987e-11	472174	ieu-b-4879	rs10840270	G	C	0.655684	telomere length || id:ieu-b-4879	TRUE	reported	igd	9.702e-05	45.8146
81	11	47440758	-0.012915	0.00205481	3.29997e-10	472174	ieu-b-4879	rs2293579	A	G	0.386274	telomere length || id:ieu-b-4879	TRUE	reported	igd	8.36579e-05	39.5042
82	11	5247791	0.0469922	0.00277015	1.50003e-64	472174	ieu-b-4879	rs10768683	G	C	0.841033	telomere length || id:ieu-b-4879	TRUE	reported	igd	0.000609086	287.768
83	11	108304509	-0.0193458	0.00256554	4.70002e-14	472174	ieu-b-4879	rs11212631	C	T	0.199229	telomere length || id:ieu-b-4879	TRUE	reported	igd	0.00012041	56.8609
84	11	128500215	0.0121739	0.00201444	1.5e-09	472174	ieu-b-4879	rs6590343	G	A	0.516385	telomere length || id:ieu-b-4879	TRUE	reported	igd	7.7342e-05	36.5215
85	11	108177097	-0.0368309	0.00203547	3.50026e-73	472174	ieu-b-4879	rs611646	A	T	0.408685	telomere length || id:ieu-b-4879	TRUE	reported	igd	0.000692934	327.411
86	12	24762109	-0.0178308	0.00290205	8e-10	472174	ieu-b-4879	rs12369950	C	T	0.140675	telomere length || id:ieu-b-4879	TRUE	reported	igd	7.99457e-05	37.7511
87	12	54694560	0.0281517	0.00343182	2.29985e-16	472174	ieu-b-4879	rs79977579	A	C	0.09555	telomere length || id:ieu-b-4879	TRUE	reported	igd	0.000142494	67.2912
88	12	122944713	-0.0172009	0.00228534	5.19996e-14	472174	ieu-b-4879	rs10773176	G	A	0.741214	telomere length || id:ieu-b-4879	TRUE	reported	igd	0.000119963	56.6499
89	12	11757743	-0.0141214	0.00209396	1.50003e-11	472174	ieu-b-4879	rs10845387	A	G	0.352666	telomere length || id:ieu-b-4879	TRUE	reported	igd	9.63108e-05	45.4796
90	12	57082058	-0.0168922	0.00300983	2e-08	472174	ieu-b-4879	rs17445108	A	G	0.12695	telomere length || id:ieu-b-4879	TRUE	reported	igd	6.67049e-05	31.4983
91	12	111833788	0.0149944	0.00205494	2.90001e-13	472174	ieu-b-4879	rs10774624	A	G	0.53276	telomere length || id:ieu-b-4879	TRUE	reported	igd	0.000112748	53.2425
92	12	88955469	0.0150247	0.00242651	5.89997e-10	472174	ieu-b-4879	rs1907702	A	G	0.766771	telomere length || id:ieu-b-4879	TRUE	reported	igd	8.11914e-05	38.3394
93	12	120904895	0.0295125	0.00333186	8.19974e-19	472174	ieu-b-4879	rs76666449	C	T	0.100625	telomere length || id:ieu-b-4879	TRUE	reported	igd	0.000166136	78.4579
94	12	123895906	0.0187657	0.00224024	5.40008e-17	472174	ieu-b-4879	rs28577594	C	G	0.709829	telomere length || id:ieu-b-4879	TRUE	reported	igd	0.000148585	70.1679
95	13	41695100	0.0256552	0.00273159	5.90065e-21	472174	ieu-b-4879	rs1332941	G	A	0.820466	telomere length || id:ieu-b-4879	TRUE	reported	igd	0.000186783	88.21
96	13	71236611	-0.0115801	0.00203062	1.2e-08	472174	ieu-b-4879	rs670180	A	T	0.569104	telomere length || id:ieu-b-4879	TRUE	reported	igd	6.88708e-05	32.5211
97	13	73317585	0.0127134	0.00213096	2.39999e-09	472174	ieu-b-4879	rs9600019	T	C	0.335579	telomere length || id:ieu-b-4879	TRUE	reported	igd	7.53769e-05	35.5935
98	14	21941148	0.0229838	0.00324156	1.29987e-12	472174	ieu-b-4879	rs73581419	T	C	0.106605	telomere length || id:ieu-b-4879	TRUE	reported	igd	0.00010646	50.2729
99	14	23499321	-0.0124075	0.00224132	3.09999e-08	472174	ieu-b-4879	rs113525195	A	C	0.290254	telomere length || id:ieu-b-4879	TRUE	reported	igd	6.48979e-05	30.645
100	14	65543102	-0.020433	0.00211433	4.30031e-22	472174	ieu-b-4879	rs45604339	T	C	0.34242	telomere length || id:ieu-b-4879	TRUE	reported	igd	0.000197756	93.3936
101	14	73418095	0.04572	0.00332355	4.70002e-43	472174	ieu-b-4879	rs137901416	A	G	0.100311	telomere length || id:ieu-b-4879	TRUE	reported	igd	0.000400619	189.237
102	14	96181360	0.0209365	0.00273361	1.9002e-14	472174	ieu-b-4879	rs1957937	T	A	0.16018	telomere length || id:ieu-b-4879	TRUE	reported	igd	0.000124216	58.6588
103	14	20812951	-0.028973	0.00452459	1.5e-10	472174	ieu-b-4879	rs3093888	A	G	0.05131	telomere length || id:ieu-b-4879	TRUE	reported	igd	8.68338e-05	41.004
104	14	91971787	-0.0192236	0.00200412	8.60003e-22	472174	ieu-b-4879	rs34550383	C	CT	0.5474	telomere length || id:ieu-b-4879	TRUE	reported	igd	0.000194821	92.0068
105	15	42032383	0.0222664	0.00210806	4.40048e-26	472174	ieu-b-4879	rs17677991	G	C	0.342123	telomere length || id:ieu-b-4879	TRUE	reported	igd	0.000236227	111.566
106	15	74336633	0.0193377	0.00202886	1.59993e-21	472174	ieu-b-4879	rs5742915	C	T	0.445829	telomere length || id:ieu-b-4879	TRUE	reported	igd	0.000192362	90.8455
107	15	56775385	0.0129362	0.00204001	2.30001e-10	472174	ieu-b-4879	rs7164950	G	A	0.405979	telomere length || id:ieu-b-4879	TRUE	reported	igd	8.51549e-05	40.2112
108	15	50366116	0.0332259	0.00234478	1.39991e-45	472174	ieu-b-4879	rs11412296	T	TA	0.759384	telomere length || id:ieu-b-4879	TRUE	reported	igd	0.000425072	200.792
109	16	3650970	-0.0352672	0.00415151	1.99986e-17	472174	ieu-b-4879	rs80116508	A	G	0.062356	telomere length || id:ieu-b-4879	TRUE	reported	igd	0.000152813	72.1652
110	16	50188929	0.0359839	0.00431741	7.8001e-17	472174	ieu-b-4879	rs76219171	A	G	0.058433	telomere length || id:ieu-b-4879	TRUE	reported	igd	0.000147097	69.4653
111	16	82200103	-0.0461595	0.00238972	4.00037e-83	472174	ieu-b-4879	rs2967355	C	A	0.774276	telomere length || id:ieu-b-4879	TRUE	reported	igd	0.000789556	373.101
112	16	90141355	-0.0146622	0.00213796	7.00003e-12	472174	ieu-b-4879	rs12925933	C	A	0.66221	telomere length || id:ieu-b-4879	TRUE	reported	igd	9.95987e-05	47.0324
113	16	48283993	0.0238271	0.00409406	5.89997e-09	472174	ieu-b-4879	rs111950327	C	G	0.063628	telomere length || id:ieu-b-4879	TRUE	reported	igd	7.173e-05	33.8713
114	16	28413517	0.0142833	0.00245428	5.89997e-09	472174	ieu-b-4879	rs450962	G	A	0.283779	telomere length || id:ieu-b-4879	TRUE	reported	igd	7.17258e-05	33.8694
115	16	69406986	0.023863	0.00220455	2.60016e-27	472174	ieu-b-4879	rs3785074	G	A	0.289672	telomere length || id:ieu-b-4879	TRUE	reported	igd	0.000248085	117.168
116	16	74678063	0.0342843	0.00290708	4.19952e-32	472174	ieu-b-4879	rs76065543	T	C	0.137527	telomere length || id:ieu-b-4879	TRUE	reported	igd	0.000294474	139.083
117	16	9072085	-0.0136257	0.0020276	1.80011e-11	472174	ieu-b-4879	rs12932179	G	A	0.561399	telomere length || id:ieu-b-4879	TRUE	reported	igd	9.56334e-05	45.1597
118	16	14652220	-0.0571159	0.00680853	4.90004e-17	472174	ieu-b-4879	rs182059586	C	T	0.02511	telomere length || id:ieu-b-4879	TRUE	reported	igd	0.000149019	70.3729
119	16	88092092	0.0232506	0.00219601	3.40017e-26	472174	ieu-b-4879	rs11117354	C	T	0.696513	telomere length || id:ieu-b-4879	TRUE	reported	igd	0.000237353	112.098
120	16	3613207	-0.033609	0.00411613	3.19963e-16	472174	ieu-b-4879	rs9940099	T	G	0.062718	telomere length || id:ieu-b-4879	TRUE	reported	igd	0.000141179	66.6701
121	16	70187811	-0.0203556	0.0022296	6.90081e-20	472174	ieu-b-4879	rs56061761	A	G	0.332642	telomere length || id:ieu-b-4879	TRUE	reported	igd	0.000176496	83.3512
122	17	7760397	-0.0547446	0.00312441	9.79941e-69	472174	ieu-b-4879	rs4724	A	G	0.116598	telomere length || id:ieu-b-4879	TRUE	reported	igd	0.000649774	307.004
123	17	2247982	-0.0116145	0.00207578	2.19999e-08	472174	ieu-b-4879	rs12451892	C	T	0.380511	telomere length || id:ieu-b-4879	TRUE	reported	igd	6.62991e-05	31.3066
124	17	65705530	0.011819	0.00202865	5.69994e-09	472174	ieu-b-4879	rs7209057	A	G	0.561044	telomere length || id:ieu-b-4879	TRUE	reported	igd	7.1881e-05	33.9426
125	17	1666218	0.0202133	0.00230175	1.59993e-18	472174	ieu-b-4879	rs59409453	G	A	0.730602	telomere length || id:ieu-b-4879	TRUE	reported	igd	0.0001633	77.1181
126	17	29252703	0.0125	0.00211016	3.09999e-09	472174	ieu-b-4879	rs111527438	C	T	0.351251	telomere length || id:ieu-b-4879	TRUE	reported	igd	7.43113e-05	35.0903
127	17	76195153	0.0143271	0.00247042	6.69993e-09	472174	ieu-b-4879	rs7221585	T	C	0.22401	telomere length || id:ieu-b-4879	TRUE	reported	igd	7.12266e-05	33.6336
128	17	8064779	-0.0235179	0.0023186	3.59998e-24	472174	ieu-b-4879	rs75664430	G	C	0.248028	telomere length || id:ieu-b-4879	TRUE	reported	igd	0.000217846	102.883
129	17	41456413	-0.0259793	0.00267858	2.99985e-22	472174	ieu-b-4879	rs56799554	G	A	0.170183	telomere length || id:ieu-b-4879	TRUE	reported	igd	0.000199185	94.0684
130	17	76183233	-0.100574	0.00913369	3.40017e-28	472174	ieu-b-4879	rs144204502	T	C	0.012562	telomere length || id:ieu-b-4879	TRUE	reported	igd	0.000256723	121.249
131	18	708207	0.063762	0.00739877	6.79986e-18	472174	ieu-b-4879	rs150150565	T	C	0.021455	telomere length || id:ieu-b-4879	TRUE	reported	igd	0.000157266	74.2682
132	18	709396	-0.0817874	0.00937157	2.60016e-18	472174	ieu-b-4879	rs116863223	A	G	0.011763	telomere length || id:ieu-b-4879	TRUE	reported	igd	0.000161278	76.1634
133	18	42070981	-0.029945	0.00285068	8.19974e-26	472174	ieu-b-4879	rs16978028	T	A	0.143727	telomere length || id:ieu-b-4879	TRUE	reported	igd	0.000233641	110.344
134	18	51798047	0.0233529	0.00204247	2.80027e-30	472174	ieu-b-4879	rs2276182	G	C	0.403227	telomere length || id:ieu-b-4879	TRUE	reported	igd	0.000276788	130.728
135	18	78008334	-0.0190311	0.00299791	2.19999e-10	472174	ieu-b-4879	rs9955360	A	C	0.869288	telomere length || id:ieu-b-4879	TRUE	reported	igd	8.53398e-05	40.2985
136	18	658423	-0.0425685	0.00239551	1.20005e-70	472174	ieu-b-4879	rs3891167	G	A	0.253435	telomere length || id:ieu-b-4879	TRUE	reported	igd	0.000668326	315.776
137	18	729871	-0.0612563	0.0105346	6.1e-09	472174	ieu-b-4879	rs139669835	T	C	0.009365	telomere length || id:ieu-b-4879	TRUE	reported	igd	7.16032e-05	33.8114
138	19	4368142	-0.0131806	0.00236713	2.59998e-08	472174	ieu-b-4879	rs11085072	T	C	0.236909	telomere length || id:ieu-b-4879	TRUE	reported	igd	6.56592e-05	31.0045
139	19	33752994	0.0138793	0.0020567	1.50003e-11	472174	ieu-b-4879	rs4530278	T	G	0.59815	telomere length || id:ieu-b-4879	TRUE	reported	igd	9.64382e-05	45.5398
140	19	22215441	0.0328384	0.00220117	2.49977e-50	472174	ieu-b-4879	rs8105767	G	A	0.29467	telomere length || id:ieu-b-4879	TRUE	reported	igd	0.00047114	222.564
141	19	45411941	0.0173498	0.00277091	3.79997e-10	472174	ieu-b-4879	rs429358	C	T	0.153969	telomere length || id:ieu-b-4879	TRUE	reported	igd	8.30244e-05	39.2051
142	19	57370055	-0.0149654	0.0020233	1.39991e-13	472174	ieu-b-4879	rs8102497	A	G	0.431828	telomere length || id:ieu-b-4879	TRUE	reported	igd	0.000115852	54.7084
143	20	62157200	0.0641957	0.00602028	1.50003e-26	472174	ieu-b-4879	rs11699829	A	G	0.034146	telomere length || id:ieu-b-4879	TRUE	reported	igd	0.000240753	113.704
144	20	62488152	-0.0504903	0.00539933	8.69961e-21	472174	ieu-b-4879	rs142426306	T	C	0.039544	telomere length || id:ieu-b-4879	TRUE	reported	igd	0.000185163	87.4449
145	20	35525640	0.0493145	0.0027991	1.80011e-69	472174	ieu-b-4879	rs1291143	C	A	0.849026	telomere length || id:ieu-b-4879	TRUE	reported	igd	0.000656939	310.392
146	20	66370	-0.0141684	0.00247729	1.09999e-08	472174	ieu-b-4879	rs6054257	A	G	0.793522	telomere length || id:ieu-b-4879	TRUE	reported	igd	6.92717e-05	32.7104
147	20	62321128	-0.209011	0.00702087	9.59401e-195	472174	ieu-b-4879	rs35640778	A	G	0.020757	telomere length || id:ieu-b-4879	TRUE	reported	igd	0.00187344	886.247
148	20	62291767	-0.0723995	0.00369421	1.59993e-85	472174	ieu-b-4879	rs143190905	T	G	0.080404	telomere length || id:ieu-b-4879	TRUE	reported	igd	0.00081278	384.084
149	20	62375508	0.0611702	0.0093095	5.00035e-11	472174	ieu-b-4879	rs41304832	A	G	0.012378	telomere length || id:ieu-b-4879	TRUE	reported	igd	9.14293e-05	43.1743
150	20	62574274	-0.0790134	0.00824611	9.49948e-22	472174	ieu-b-4879	rs117512405	A	G	0.017043	telomere length || id:ieu-b-4879	TRUE	reported	igd	0.000194409	91.8124
151	22	17469049	-0.0215916	0.00206208	1.20005e-25	472174	ieu-b-4879	rs28502153	A	C	0.377958	telomere length || id:ieu-b-4879	TRUE	reported	igd	0.000232143	109.637
152	22	45790132	0.0144904	0.00209637	4.79954e-12	472174	ieu-b-4879	rs6007020	C	T	0.367823	telomere length || id:ieu-b-4879	TRUE	reported	igd	0.000101176	47.7775
153	22	50971631	0.0243752	0.00236561	6.79986e-25	472174	ieu-b-4879	rs131797	T	TAAAAA	0.235625	telomere length || id:ieu-b-4879	TRUE	reported	igd	0.000224807	106.172
154	22	51072289	0.0141734	0.00247546	1e-08	472174	ieu-b-4879	rs1003322	A	C	0.213742	telomere length || id:ieu-b-4879	TRUE	reported	igd	6.94231e-05	32.7819
