# Supplementary material for: New insights from bidirectional Mendelian randomization: causal relationships between telomere length and mitochondrial DNA copy number in aging biomarkers
Source: Aging (Albany NY). 2024 Apr 24;16(8):7387–404. doi: 10.18632/aging.205765 (PMC11087129; doi:10.18632/aging.205765)
Supplement: Supplementary Table 5 [file aging-16-205765-s006.xlsx]

## Sheet: Table s5 IVs related to TL as e
Supplementary Table 5. IVs related to TL as exposure on mtDNA copy number as outcome.
	SNP	chr	pos	beta.outcome	se.outcome	samplesize.outcome	pval.outcome	eaf.outcome	effect_allele.outcome	other_allele.outcome	outcome	id.outcome	proxy.outcome	target_snp.outcome	proxy_snp.outcome	target_a1.outcome	target_a2.outcome	proxy_a1.outcome	proxy_a2.outcome	originalname.outcome	outcome.deprecated	mr_keep.outcome	data_source.outcome
1	rs3767952	1	41231032	-0.001	0.0025	383476	0.7003	NA	A	G	Mitochondrial DNA copy number || id:ebi-a-GCST90026372	ebi-a-GCST90026372	FALSE	rs3767952	rs3767952	NA	NA	NA	NA	Mitochondrial DNA copy number	Mitochondrial DNA copy number || ||	TRUE	igd
2	rs4498805	1	110910397	0.0018	0.0021	383476	0.3978	NA	T	G	Mitochondrial DNA copy number || id:ebi-a-GCST90026372	ebi-a-GCST90026372	FALSE	rs4498805	rs4498805	NA	NA	NA	NA	Mitochondrial DNA copy number	Mitochondrial DNA copy number || ||	TRUE	igd
3	rs932002	1	226577306	0.0018	0.0029	383476	0.54	NA	T	C	Mitochondrial DNA copy number || id:ebi-a-GCST90026372	ebi-a-GCST90026372	FALSE	rs932002	rs932002	NA	NA	NA	NA	Mitochondrial DNA copy number	Mitochondrial DNA copy number || ||	TRUE	igd
4	rs66731853	1	20916238	0.0027	0.0023	383476	0.2255	NA	A	G	Mitochondrial DNA copy number || id:ebi-a-GCST90026372	ebi-a-GCST90026372	FALSE	rs66731853	rs66731853	NA	NA	NA	NA	Mitochondrial DNA copy number	Mitochondrial DNA copy number || ||	TRUE	igd
5	rs11584821	1	114419489	-0.0017	0.0028	383476	0.541101	NA	T	C	Mitochondrial DNA copy number || id:ebi-a-GCST90026372	ebi-a-GCST90026372	FALSE	rs11584821	rs11584821	NA	NA	NA	NA	Mitochondrial DNA copy number	Mitochondrial DNA copy number || ||	TRUE	igd
6	rs6659669	1	185315067	-0.0011	0.0022	383476	0.6186	NA	T	C	Mitochondrial DNA copy number || id:ebi-a-GCST90026372	ebi-a-GCST90026372	FALSE	rs6659669	rs6659669	NA	NA	NA	NA	Mitochondrial DNA copy number	Mitochondrial DNA copy number || ||	TRUE	igd
7	rs2977608	1	768253	0.0236	0.0025	383476	2.58107e-21	NA	C	A	Mitochondrial DNA copy number || id:ebi-a-GCST90026372	ebi-a-GCST90026372	FALSE	rs2977608	rs2977608	NA	NA	NA	NA	Mitochondrial DNA copy number	Mitochondrial DNA copy number || ||	TRUE	igd
8	rs6669563	1	32279629	-0.0012	0.0021	383476	0.574	NA	A	G	Mitochondrial DNA copy number || id:ebi-a-GCST90026372	ebi-a-GCST90026372	FALSE	rs6669563	rs6669563	NA	NA	NA	NA	Mitochondrial DNA copy number	Mitochondrial DNA copy number || ||	TRUE	igd
9	rs145114957	1	94322469	0.0009	0.0055	383476	0.8683	NA	G	C	Mitochondrial DNA copy number || id:ebi-a-GCST90026372	ebi-a-GCST90026372	FALSE	rs145114957	rs145114957	NA	NA	NA	NA	Mitochondrial DNA copy number	Mitochondrial DNA copy number || ||	TRUE	igd
10	rs41269079	1	45252015	0.0021	0.0027	383476	0.4322	NA	A	T	Mitochondrial DNA copy number || id:ebi-a-GCST90026372	ebi-a-GCST90026372	FALSE	rs41269079	rs41269079	NA	NA	NA	NA	Mitochondrial DNA copy number	Mitochondrial DNA copy number || ||	TRUE	igd
11	rs139795227	1	92842367	-0.0165	0.0089	383476	0.0648396	NA	C	A	Mitochondrial DNA copy number || id:ebi-a-GCST90026372	ebi-a-GCST90026372	FALSE	rs139795227	rs139795227	NA	NA	NA	NA	Mitochondrial DNA copy number	Mitochondrial DNA copy number || ||	TRUE	igd
12	rs11579626	1	146741960	0.0036	0.0038	383476	0.3445	NA	C	A	Mitochondrial DNA copy number || id:ebi-a-GCST90026372	ebi-a-GCST90026372	FALSE	rs11579626	rs11579626	NA	NA	NA	NA	Mitochondrial DNA copy number	Mitochondrial DNA copy number || ||	TRUE	igd
13	rs6587577	1	151402045	-0.0013	0.0028	383476	0.6474	NA	G	A	Mitochondrial DNA copy number || id:ebi-a-GCST90026372	ebi-a-GCST90026372	FALSE	rs6587577	rs6587577	NA	NA	NA	NA	Mitochondrial DNA copy number	Mitochondrial DNA copy number || ||	TRUE	igd
14	rs6751209	2	43588302	-0.0029	0.0026	383476	0.2659	NA	C	T	Mitochondrial DNA copy number || id:ebi-a-GCST90026372	ebi-a-GCST90026372	FALSE	rs6751209	rs6751209	NA	NA	NA	NA	Mitochondrial DNA copy number	Mitochondrial DNA copy number || ||	TRUE	igd
15	rs188918174	2	54473646	0.0081	0.0056	383476	0.1494	NA	T	C	Mitochondrial DNA copy number || id:ebi-a-GCST90026372	ebi-a-GCST90026372	FALSE	rs188918174	rs188918174	NA	NA	NA	NA	Mitochondrial DNA copy number	Mitochondrial DNA copy number || ||	TRUE	igd
16	rs202034370	2	54488018	0.0051	0.0068	383476	0.4523	NA	TA	T	Mitochondrial DNA copy number || id:ebi-a-GCST90026372	ebi-a-GCST90026372	FALSE	rs202034370	rs202034370	NA	NA	NA	NA	Mitochondrial DNA copy number	Mitochondrial DNA copy number || ||	TRUE	igd
17	rs56178008	2	29098543	0.0071	0.0021	383476	0.000841608	NA	A	T	Mitochondrial DNA copy number || id:ebi-a-GCST90026372	ebi-a-GCST90026372	FALSE	rs56178008	rs56178008	NA	NA	NA	NA	Mitochondrial DNA copy number	Mitochondrial DNA copy number || ||	TRUE	igd
18	rs376641875	2	54622978	-0.0014	0.0044	383476	0.7568	NA	CATAA	C	Mitochondrial DNA copy number || id:ebi-a-GCST90026372	ebi-a-GCST90026372	FALSE	rs376641875	rs376641875	NA	NA	NA	NA	Mitochondrial DNA copy number	Mitochondrial DNA copy number || ||	TRUE	igd
19	rs17803849	2	210673445	0.0041	0.0022	383476	0.0541602	NA	T	C	Mitochondrial DNA copy number || id:ebi-a-GCST90026372	ebi-a-GCST90026372	FALSE	rs17803849	rs17803849	NA	NA	NA	NA	Mitochondrial DNA copy number	Mitochondrial DNA copy number || ||	TRUE	igd
20	rs2555104	2	17841243	-0.0033	0.0021	383476	0.1201	NA	C	A	Mitochondrial DNA copy number || id:ebi-a-GCST90026372	ebi-a-GCST90026372	FALSE	rs2555104	rs2555104	NA	NA	NA	NA	Mitochondrial DNA copy number	Mitochondrial DNA copy number || ||	TRUE	igd
21	rs77732866	2	58979879	0.0005	0.0031	383476	0.8708	NA	A	G	Mitochondrial DNA copy number || id:ebi-a-GCST90026372	ebi-a-GCST90026372	FALSE	rs77732866	rs77732866	NA	NA	NA	NA	Mitochondrial DNA copy number	Mitochondrial DNA copy number || ||	TRUE	igd
22	rs2230590	3	49936102	-0.0028	0.0021	383476	0.1791	NA	C	T	Mitochondrial DNA copy number || id:ebi-a-GCST90026372	ebi-a-GCST90026372	FALSE	rs2230590	rs2230590	NA	NA	NA	NA	Mitochondrial DNA copy number	Mitochondrial DNA copy number || ||	TRUE	igd
23	rs78491606	3	72891547	0.0047	0.0076	383476	0.5369	NA	C	A	Mitochondrial DNA copy number || id:ebi-a-GCST90026372	ebi-a-GCST90026372	FALSE	rs78491606	rs78491606	NA	NA	NA	NA	Mitochondrial DNA copy number	Mitochondrial DNA copy number || ||	TRUE	igd
24	rs9878436	3	138244400	-0.0018	0.0021	383476	0.3921	NA	T	C	Mitochondrial DNA copy number || id:ebi-a-GCST90026372	ebi-a-GCST90026372	FALSE	rs9878436	rs9878436	NA	NA	NA	NA	Mitochondrial DNA copy number	Mitochondrial DNA copy number || ||	TRUE	igd
25	rs35446936	3	169486508	-0.0033	0.0025	383476	0.1832	NA	A	G	Mitochondrial DNA copy number || id:ebi-a-GCST90026372	ebi-a-GCST90026372	FALSE	rs35446936	rs35446936	NA	NA	NA	NA	Mitochondrial DNA copy number	Mitochondrial DNA copy number || ||	TRUE	igd
26	rs13062095	3	101267385	0.0006	0.0022	383476	0.7962	NA	C	T	Mitochondrial DNA copy number || id:ebi-a-GCST90026372	ebi-a-GCST90026372	FALSE	rs13062095	rs13062095	NA	NA	NA	NA	Mitochondrial DNA copy number	Mitochondrial DNA copy number || ||	TRUE	igd
27	rs4616688	3	160042459	0.0027	0.0021	383476	0.2007	NA	T	G	Mitochondrial DNA copy number || id:ebi-a-GCST90026372	ebi-a-GCST90026372	FALSE	rs4616688	rs4616688	NA	NA	NA	NA	Mitochondrial DNA copy number	Mitochondrial DNA copy number || ||	TRUE	igd
28	rs6790988	3	170263320	0.0022	0.0024	383476	0.3546	NA	G	A	Mitochondrial DNA copy number || id:ebi-a-GCST90026372	ebi-a-GCST90026372	FALSE	rs6790988	rs6790988	NA	NA	NA	NA	Mitochondrial DNA copy number	Mitochondrial DNA copy number || ||	TRUE	igd
29	rs869785	3	24347800	-0.0035	0.0022	383476	0.1206	NA	C	T	Mitochondrial DNA copy number || id:ebi-a-GCST90026372	ebi-a-GCST90026372	FALSE	rs869785	rs869785	NA	NA	NA	NA	Mitochondrial DNA copy number	Mitochondrial DNA copy number || ||	TRUE	igd
30	rs6776756	3	128215821	-0.0015	0.0021	383476	0.4955	NA	A	G	Mitochondrial DNA copy number || id:ebi-a-GCST90026372	ebi-a-GCST90026372	FALSE	rs6776756	rs6776756	NA	NA	NA	NA	Mitochondrial DNA copy number	Mitochondrial DNA copy number || ||	TRUE	igd
31	rs11426156	3	128318179	-0.0035	0.0022	383476	0.1092	NA	TA	T	Mitochondrial DNA copy number || id:ebi-a-GCST90026372	ebi-a-GCST90026372	FALSE	rs11426156	rs11426156	NA	NA	NA	NA	Mitochondrial DNA copy number	Mitochondrial DNA copy number || ||	TRUE	igd
32	rs10805346	4	9920347	0.0007	0.0021	383476	0.752801	NA	C	T	Mitochondrial DNA copy number || id:ebi-a-GCST90026372	ebi-a-GCST90026372	FALSE	rs10805346	rs10805346	NA	NA	NA	NA	Mitochondrial DNA copy number	Mitochondrial DNA copy number || ||	TRUE	igd
33	rs6536702	4	164028105	-0.0004	0.0025	383476	0.8748	NA	A	G	Mitochondrial DNA copy number || id:ebi-a-GCST90026372	ebi-a-GCST90026372	FALSE	rs6536702	rs6536702	NA	NA	NA	NA	Mitochondrial DNA copy number	Mitochondrial DNA copy number || ||	TRUE	igd
34	rs871134	4	7044380	0.0052	0.0021	383476	0.0151098	NA	T	C	Mitochondrial DNA copy number || id:ebi-a-GCST90026372	ebi-a-GCST90026372	FALSE	rs871134	rs871134	NA	NA	NA	NA	Mitochondrial DNA copy number	Mitochondrial DNA copy number || ||	TRUE	igd
35	rs4695407	4	48843372	-0.0038	0.0021	383476	0.0681695	NA	G	A	Mitochondrial DNA copy number || id:ebi-a-GCST90026372	ebi-a-GCST90026372	FALSE	rs4695407	rs4695407	NA	NA	NA	NA	Mitochondrial DNA copy number	Mitochondrial DNA copy number || ||	TRUE	igd
36	rs2282764	4	2255063	-0.0031	0.0031	383476	0.3186	NA	G	A	Mitochondrial DNA copy number || id:ebi-a-GCST90026372	ebi-a-GCST90026372	FALSE	rs2282764	rs2282764	NA	NA	NA	NA	Mitochondrial DNA copy number	Mitochondrial DNA copy number || ||	TRUE	igd
37	rs7705526	5	1285974	0.0178	0.0023	383476	6.45654e-15	NA	A	C	Mitochondrial DNA copy number || id:ebi-a-GCST90026372	ebi-a-GCST90026372	FALSE	rs7705526	rs7705526	NA	NA	NA	NA	Mitochondrial DNA copy number	Mitochondrial DNA copy number || ||	TRUE	igd
38	rs73730598	5	77973	-0.0008	0.0046	383476	0.8614	NA	A	G	Mitochondrial DNA copy number || id:ebi-a-GCST90026372	ebi-a-GCST90026372	FALSE	rs73730598	rs73730598	NA	NA	NA	NA	Mitochondrial DNA copy number	Mitochondrial DNA copy number || ||	TRUE	igd
39	rs61748181	5	1294166	0.0046	0.0062	383476	0.4568	NA	T	C	Mitochondrial DNA copy number || id:ebi-a-GCST90026372	ebi-a-GCST90026372	FALSE	rs61748181	rs61748181	NA	NA	NA	NA	Mitochondrial DNA copy number	Mitochondrial DNA copy number || ||	TRUE	igd
40	rs6881568	5	1670265	0.0021	0.0022	383476	0.3373	NA	A	C	Mitochondrial DNA copy number || id:ebi-a-GCST90026372	ebi-a-GCST90026372	FALSE	rs6881568	rs6881568	NA	NA	NA	NA	Mitochondrial DNA copy number	Mitochondrial DNA copy number || ||	TRUE	igd
41	rs55747751	5	132397351	0.0023	0.0039	383476	0.5454	NA	A	G	Mitochondrial DNA copy number || id:ebi-a-GCST90026372	ebi-a-GCST90026372	FALSE	rs55747751	rs55747751	NA	NA	NA	NA	Mitochondrial DNA copy number	Mitochondrial DNA copy number || ||	TRUE	igd
42	rs185174247	5	138914024	0.0044	0.0047	383476	0.3511	NA	A	G	Mitochondrial DNA copy number || id:ebi-a-GCST90026372	ebi-a-GCST90026372	FALSE	rs185174247	rs185174247	NA	NA	NA	NA	Mitochondrial DNA copy number	Mitochondrial DNA copy number || ||	TRUE	igd
43	rs141214782	5	78954683	0.0002	0.0036	383476	0.9623	NA	TTATC	T	Mitochondrial DNA copy number || id:ebi-a-GCST90026372	ebi-a-GCST90026372	FALSE	rs141214782	rs141214782	NA	NA	NA	NA	Mitochondrial DNA copy number	Mitochondrial DNA copy number || ||	TRUE	igd
44	rs28363070	5	1415068	-0.0182	0.0099	383476	0.0669098	NA	A	G	Mitochondrial DNA copy number || id:ebi-a-GCST90026372	ebi-a-GCST90026372	FALSE	rs28363070	rs28363070	NA	NA	NA	NA	Mitochondrial DNA copy number	Mitochondrial DNA copy number || ||	TRUE	igd
45	rs1611236	6	29748690	0.0036	0.0023	383476	0.1167	NA	A	G	Mitochondrial DNA copy number || id:ebi-a-GCST90026372	ebi-a-GCST90026372	FALSE	rs1611236	rs1611236	NA	NA	NA	NA	Mitochondrial DNA copy number	Mitochondrial DNA copy number || ||	TRUE	igd
46	rs7772289	6	28674322	0.0041	0.0021	383476	0.0538406	NA	T	G	Mitochondrial DNA copy number || id:ebi-a-GCST90026372	ebi-a-GCST90026372	FALSE	rs7772289	rs7772289	NA	NA	NA	NA	Mitochondrial DNA copy number	Mitochondrial DNA copy number || ||	TRUE	igd
47	rs2763979	6	31794592	0.0008	0.0022	383476	0.715201	NA	T	C	Mitochondrial DNA copy number || id:ebi-a-GCST90026372	ebi-a-GCST90026372	FALSE	rs2763979	rs2763979	NA	NA	NA	NA	Mitochondrial DNA copy number	Mitochondrial DNA copy number || ||	TRUE	igd
48	rs80324517	6	204031	-0.0005	0.0049	383476	0.9177	NA	A	G	Mitochondrial DNA copy number || id:ebi-a-GCST90026372	ebi-a-GCST90026372	FALSE	rs80324517	rs80324517	NA	NA	NA	NA	Mitochondrial DNA copy number	Mitochondrial DNA copy number || ||	TRUE	igd
49	rs9398196	6	109601554	0.0062	0.0021	383476	0.00404203	NA	G	A	Mitochondrial DNA copy number || id:ebi-a-GCST90026372	ebi-a-GCST90026372	FALSE	rs9398196	rs9398196	NA	NA	NA	NA	Mitochondrial DNA copy number	Mitochondrial DNA copy number || ||	TRUE	igd
50	rs61405042	7	67200	0.0032	0.0245	383476	0.8948	NA	T	C	Mitochondrial DNA copy number || id:ebi-a-GCST90026372	ebi-a-GCST90026372	FALSE	rs61405042	rs61405042	NA	NA	NA	NA	Mitochondrial DNA copy number	Mitochondrial DNA copy number || ||	TRUE	igd
51	rs117407747	7	159117178	0.0061	0.0063	383476	0.331	NA	T	C	Mitochondrial DNA copy number || id:ebi-a-GCST90026372	ebi-a-GCST90026372	FALSE	rs117407747	rs117407747	NA	NA	NA	NA	Mitochondrial DNA copy number	Mitochondrial DNA copy number || ||	TRUE	igd
52	rs1985369	7	159119220	0.0019	0.0032	383476	0.5412	NA	G	A	Mitochondrial DNA copy number || id:ebi-a-GCST90026372	ebi-a-GCST90026372	FALSE	rs1985369	rs1985369	NA	NA	NA	NA	Mitochondrial DNA copy number	Mitochondrial DNA copy number || ||	TRUE	igd
53	rs13230646	7	23930316	0.0001	0.0024	383476	0.9725	NA	C	T	Mitochondrial DNA copy number || id:ebi-a-GCST90026372	ebi-a-GCST90026372	FALSE	rs13230646	rs13230646	NA	NA	NA	NA	Mitochondrial DNA copy number	Mitochondrial DNA copy number || ||	TRUE	igd
54	rs11769630	7	50257703	0.0052	0.004	383476	0.1972	NA	A	T	Mitochondrial DNA copy number || id:ebi-a-GCST90026372	ebi-a-GCST90026372	FALSE	rs11769630	rs11769630	NA	NA	NA	NA	Mitochondrial DNA copy number	Mitochondrial DNA copy number || ||	TRUE	igd
55	rs2056726	7	99780283	0.0027	0.0026	383476	0.2916	NA	A	G	Mitochondrial DNA copy number || id:ebi-a-GCST90026372	ebi-a-GCST90026372	FALSE	rs2056726	rs2056726	NA	NA	NA	NA	Mitochondrial DNA copy number	Mitochondrial DNA copy number || ||	TRUE	igd
56	rs7790856	7	124459852	-0.0026	0.0023	383476	0.2672	NA	T	C	Mitochondrial DNA copy number || id:ebi-a-GCST90026372	ebi-a-GCST90026372	FALSE	rs7790856	rs7790856	NA	NA	NA	NA	Mitochondrial DNA copy number	Mitochondrial DNA copy number || ||	TRUE	igd
57	rs4731541	7	128678236	-0.0026	0.0022	383476	0.2293	NA	G	C	Mitochondrial DNA copy number || id:ebi-a-GCST90026372	ebi-a-GCST90026372	FALSE	rs4731541	rs4731541	NA	NA	NA	NA	Mitochondrial DNA copy number	Mitochondrial DNA copy number || ||	TRUE	igd
58	rs117630647	7	124779510	0.0018	0.0074	383476	0.8077	NA	A	G	Mitochondrial DNA copy number || id:ebi-a-GCST90026372	ebi-a-GCST90026372	FALSE	rs117630647	rs117630647	NA	NA	NA	NA	Mitochondrial DNA copy number	Mitochondrial DNA copy number || ||	TRUE	igd
59	rs2306646	8	21846586	-0.0038	0.0021	383476	0.0711295	NA	C	G	Mitochondrial DNA copy number || id:ebi-a-GCST90026372	ebi-a-GCST90026372	FALSE	rs2306646	rs2306646	NA	NA	NA	NA	Mitochondrial DNA copy number	Mitochondrial DNA copy number || ||	TRUE	igd
60	rs762679	8	48885436	0.0026	0.003	383476	0.3789	NA	A	T	Mitochondrial DNA copy number || id:ebi-a-GCST90026372	ebi-a-GCST90026372	FALSE	rs762679	rs762679	NA	NA	NA	NA	Mitochondrial DNA copy number	Mitochondrial DNA copy number || ||	TRUE	igd
61	rs11991877	8	56664524	0.0109	0.0034	383476	0.00135301	NA	A	T	Mitochondrial DNA copy number || id:ebi-a-GCST90026372	ebi-a-GCST90026372	FALSE	rs11991877	rs11991877	NA	NA	NA	NA	Mitochondrial DNA copy number	Mitochondrial DNA copy number || ||	TRUE	igd
62	rs10112752	8	73958718	0.0002	0.0021	383476	0.9256	NA	A	G	Mitochondrial DNA copy number || id:ebi-a-GCST90026372	ebi-a-GCST90026372	FALSE	rs10112752	rs10112752	NA	NA	NA	NA	Mitochondrial DNA copy number	Mitochondrial DNA copy number || ||	TRUE	igd
63	rs1023767	8	95530969	-0.0035	0.0025	383476	0.1637	NA	A	G	Mitochondrial DNA copy number || id:ebi-a-GCST90026372	ebi-a-GCST90026372	FALSE	rs1023767	rs1023767	NA	NA	NA	NA	Mitochondrial DNA copy number	Mitochondrial DNA copy number || ||	TRUE	igd
64	rs11557154	9	34107505	0.0006	0.0032	383476	0.8534	NA	T	C	Mitochondrial DNA copy number || id:ebi-a-GCST90026372	ebi-a-GCST90026372	FALSE	rs11557154	rs11557154	NA	NA	NA	NA	Mitochondrial DNA copy number	Mitochondrial DNA copy number || ||	TRUE	igd
65	rs4743037	9	109639970	0.0015	0.0025	383476	0.553	NA	T	C	Mitochondrial DNA copy number || id:ebi-a-GCST90026372	ebi-a-GCST90026372	FALSE	rs4743037	rs4743037	NA	NA	NA	NA	Mitochondrial DNA copy number	Mitochondrial DNA copy number || ||	TRUE	igd
66	rs117034449	10	103855348	0.0187	0.0069	383476	0.00678	NA	A	G	Mitochondrial DNA copy number || id:ebi-a-GCST90026372	ebi-a-GCST90026372	FALSE	rs117034449	rs117034449	NA	NA	NA	NA	Mitochondrial DNA copy number	Mitochondrial DNA copy number || ||	TRUE	igd
67	rs7099229	10	96134685	-0.0019	0.0024	383476	0.4152	NA	A	G	Mitochondrial DNA copy number || id:ebi-a-GCST90026372	ebi-a-GCST90026372	FALSE	rs7099229	rs7099229	NA	NA	NA	NA	Mitochondrial DNA copy number	Mitochondrial DNA copy number || ||	TRUE	igd
68	rs12412214	10	101276256	-0.0061	0.0023	383476	0.009448	NA	A	G	Mitochondrial DNA copy number || id:ebi-a-GCST90026372	ebi-a-GCST90026372	FALSE	rs12412214	rs12412214	NA	NA	NA	NA	Mitochondrial DNA copy number	Mitochondrial DNA copy number || ||	TRUE	igd
69	rs6584579	10	105657892	-0.0011	0.0022	383476	0.599	NA	G	A	Mitochondrial DNA copy number || id:ebi-a-GCST90026372	ebi-a-GCST90026372	TRUE	rs6584579	rs2984132	G	A	C	T	Mitochondrial DNA copy number	Mitochondrial DNA copy number || ||	TRUE	igd
70	rs9419958	10	105675946	-0.0149	0.0031	383476	1.92899e-06	NA	C	T	Mitochondrial DNA copy number || id:ebi-a-GCST90026372	ebi-a-GCST90026372	FALSE	rs9419958	rs9419958	NA	NA	NA	NA	Mitochondrial DNA copy number	Mitochondrial DNA copy number || ||	TRUE	igd
71	rs77231040	10	106280527	0.0277	0.0143	383476	0.0533003	NA	C	G	Mitochondrial DNA copy number || id:ebi-a-GCST90026372	ebi-a-GCST90026372	FALSE	rs77231040	rs77231040	NA	NA	NA	NA	Mitochondrial DNA copy number	Mitochondrial DNA copy number || ||	TRUE	igd
72	rs10905255	10	5870267	-0.0016	0.0021	383476	0.4426	NA	T	G	Mitochondrial DNA copy number || id:ebi-a-GCST90026372	ebi-a-GCST90026372	FALSE	rs10905255	rs10905255	NA	NA	NA	NA	Mitochondrial DNA copy number	Mitochondrial DNA copy number || ||	TRUE	igd
73	rs939916	11	202253	0.003	0.0023	383476	0.1919	NA	A	G	Mitochondrial DNA copy number || id:ebi-a-GCST90026372	ebi-a-GCST90026372	FALSE	rs939916	rs939916	NA	NA	NA	NA	Mitochondrial DNA copy number	Mitochondrial DNA copy number || ||	TRUE	igd
74	rs10840270	11	9629553	0.0003	0.0022	383476	0.8977	NA	G	C	Mitochondrial DNA copy number || id:ebi-a-GCST90026372	ebi-a-GCST90026372	FALSE	rs10840270	rs10840270	NA	NA	NA	NA	Mitochondrial DNA copy number	Mitochondrial DNA copy number || ||	TRUE	igd
75	rs2293579	11	47440758	-0.0026	0.0022	383476	0.2335	NA	A	G	Mitochondrial DNA copy number || id:ebi-a-GCST90026372	ebi-a-GCST90026372	FALSE	rs2293579	rs2293579	NA	NA	NA	NA	Mitochondrial DNA copy number	Mitochondrial DNA copy number || ||	TRUE	igd
76	rs10768683	11	5247791	-0.0003	0.003	383476	0.9326	NA	G	C	Mitochondrial DNA copy number || id:ebi-a-GCST90026372	ebi-a-GCST90026372	FALSE	rs10768683	rs10768683	NA	NA	NA	NA	Mitochondrial DNA copy number	Mitochondrial DNA copy number || ||	TRUE	igd
77	rs11212631	11	108304509	0.0017	0.0027	383476	0.5147	NA	C	T	Mitochondrial DNA copy number || id:ebi-a-GCST90026372	ebi-a-GCST90026372	FALSE	rs11212631	rs11212631	NA	NA	NA	NA	Mitochondrial DNA copy number	Mitochondrial DNA copy number || ||	TRUE	igd
78	rs6590343	11	128500215	0.0055	0.0021	383476	0.00967698	NA	G	A	Mitochondrial DNA copy number || id:ebi-a-GCST90026372	ebi-a-GCST90026372	FALSE	rs6590343	rs6590343	NA	NA	NA	NA	Mitochondrial DNA copy number	Mitochondrial DNA copy number || ||	TRUE	igd
79	rs611646	11	108177097	0.0065	0.0021	383476	0.00234601	NA	A	T	Mitochondrial DNA copy number || id:ebi-a-GCST90026372	ebi-a-GCST90026372	FALSE	rs611646	rs611646	NA	NA	NA	NA	Mitochondrial DNA copy number	Mitochondrial DNA copy number || ||	TRUE	igd
80	rs12369950	12	24762109	-0.0041	0.0031	383476	0.1863	NA	C	T	Mitochondrial DNA copy number || id:ebi-a-GCST90026372	ebi-a-GCST90026372	FALSE	rs12369950	rs12369950	NA	NA	NA	NA	Mitochondrial DNA copy number	Mitochondrial DNA copy number || ||	TRUE	igd
81	rs79977579	12	54694560	-0.0096	0.0035	383476	0.00666392	NA	A	C	Mitochondrial DNA copy number || id:ebi-a-GCST90026372	ebi-a-GCST90026372	FALSE	rs79977579	rs79977579	NA	NA	NA	NA	Mitochondrial DNA copy number	Mitochondrial DNA copy number || ||	TRUE	igd
82	rs10773176	12	122944713	-0.0006	0.0024	383476	0.7887	NA	G	A	Mitochondrial DNA copy number || id:ebi-a-GCST90026372	ebi-a-GCST90026372	FALSE	rs10773176	rs10773176	NA	NA	NA	NA	Mitochondrial DNA copy number	Mitochondrial DNA copy number || ||	TRUE	igd
83	rs10845387	12	11757743	-0.0004	0.0022	383476	0.8398	NA	A	G	Mitochondrial DNA copy number || id:ebi-a-GCST90026372	ebi-a-GCST90026372	FALSE	rs10845387	rs10845387	NA	NA	NA	NA	Mitochondrial DNA copy number	Mitochondrial DNA copy number || ||	TRUE	igd
84	rs17445108	12	57082058	0.0067	0.0031	383476	0.0315101	NA	A	G	Mitochondrial DNA copy number || id:ebi-a-GCST90026372	ebi-a-GCST90026372	FALSE	rs17445108	rs17445108	NA	NA	NA	NA	Mitochondrial DNA copy number	Mitochondrial DNA copy number || ||	TRUE	igd
85	rs10774624	12	111833788	-0.0039	0.0021	383476	0.0664401	NA	A	G	Mitochondrial DNA copy number || id:ebi-a-GCST90026372	ebi-a-GCST90026372	FALSE	rs10774624	rs10774624	NA	NA	NA	NA	Mitochondrial DNA copy number	Mitochondrial DNA copy number || ||	TRUE	igd
86	rs1907702	12	88955469	-0.0014	0.0026	383476	0.5876	NA	A	G	Mitochondrial DNA copy number || id:ebi-a-GCST90026372	ebi-a-GCST90026372	FALSE	rs1907702	rs1907702	NA	NA	NA	NA	Mitochondrial DNA copy number	Mitochondrial DNA copy number || ||	TRUE	igd
87	rs76666449	12	120904895	-0.0034	0.0035	383476	0.3261	NA	C	T	Mitochondrial DNA copy number || id:ebi-a-GCST90026372	ebi-a-GCST90026372	FALSE	rs76666449	rs76666449	NA	NA	NA	NA	Mitochondrial DNA copy number	Mitochondrial DNA copy number || ||	TRUE	igd
88	rs28577594	12	123895906	-0.0002	0.0024	383476	0.9441	NA	C	G	Mitochondrial DNA copy number || id:ebi-a-GCST90026372	ebi-a-GCST90026372	FALSE	rs28577594	rs28577594	NA	NA	NA	NA	Mitochondrial DNA copy number	Mitochondrial DNA copy number || ||	TRUE	igd
89	rs1332941	13	41734190	0.0003	0.0029	383476	0.9174	NA	G	A	Mitochondrial DNA copy number || id:ebi-a-GCST90026372	ebi-a-GCST90026372	TRUE	rs1332941	rs9532732	A	G	C	T	Mitochondrial DNA copy number	Mitochondrial DNA copy number || ||	TRUE	igd
90	rs670180	13	71236611	0.009	0.0021	383476	2.83198e-05	NA	A	T	Mitochondrial DNA copy number || id:ebi-a-GCST90026372	ebi-a-GCST90026372	FALSE	rs670180	rs670180	NA	NA	NA	NA	Mitochondrial DNA copy number	Mitochondrial DNA copy number || ||	TRUE	igd
91	rs9600019	13	73317585	0.003	0.0022	383476	0.1818	NA	T	C	Mitochondrial DNA copy number || id:ebi-a-GCST90026372	ebi-a-GCST90026372	FALSE	rs9600019	rs9600019	NA	NA	NA	NA	Mitochondrial DNA copy number	Mitochondrial DNA copy number || ||	TRUE	igd
92	rs73581419	14	21941148	0.0041	0.0034	383476	0.2268	NA	T	C	Mitochondrial DNA copy number || id:ebi-a-GCST90026372	ebi-a-GCST90026372	FALSE	rs73581419	rs73581419	NA	NA	NA	NA	Mitochondrial DNA copy number	Mitochondrial DNA copy number || ||	TRUE	igd
93	rs113525195	14	23499321	-0.0014	0.0024	383476	0.56	NA	A	C	Mitochondrial DNA copy number || id:ebi-a-GCST90026372	ebi-a-GCST90026372	FALSE	rs113525195	rs113525195	NA	NA	NA	NA	Mitochondrial DNA copy number	Mitochondrial DNA copy number || ||	TRUE	igd
94	rs45604339	14	65543102	0.0034	0.0022	383476	0.1192	NA	T	C	Mitochondrial DNA copy number || id:ebi-a-GCST90026372	ebi-a-GCST90026372	FALSE	rs45604339	rs45604339	NA	NA	NA	NA	Mitochondrial DNA copy number	Mitochondrial DNA copy number || ||	TRUE	igd
95	rs137901416	14	73418095	0.0039	0.0035	383476	0.2593	NA	A	G	Mitochondrial DNA copy number || id:ebi-a-GCST90026372	ebi-a-GCST90026372	FALSE	rs137901416	rs137901416	NA	NA	NA	NA	Mitochondrial DNA copy number	Mitochondrial DNA copy number || ||	TRUE	igd
96	rs1957937	14	96181360	-0.008	0.0029	383476	0.00608093	NA	T	A	Mitochondrial DNA copy number || id:ebi-a-GCST90026372	ebi-a-GCST90026372	FALSE	rs1957937	rs1957937	NA	NA	NA	NA	Mitochondrial DNA copy number	Mitochondrial DNA copy number || ||	TRUE	igd
97	rs3093888	14	20812951	-0.0009	0.0048	383476	0.8468	NA	A	G	Mitochondrial DNA copy number || id:ebi-a-GCST90026372	ebi-a-GCST90026372	FALSE	rs3093888	rs3093888	NA	NA	NA	NA	Mitochondrial DNA copy number	Mitochondrial DNA copy number || ||	TRUE	igd
98	rs34550383	14	91971787	0.0039	0.0021	383476	0.0640398	NA	CT	C	Mitochondrial DNA copy number || id:ebi-a-GCST90026372	ebi-a-GCST90026372	FALSE	rs34550383	rs34550383	NA	NA	NA	NA	Mitochondrial DNA copy number	Mitochondrial DNA copy number || ||	TRUE	igd
99	rs17677991	15	42032383	0.0042	0.0022	383476	0.0577497	NA	G	C	Mitochondrial DNA copy number || id:ebi-a-GCST90026372	ebi-a-GCST90026372	FALSE	rs17677991	rs17677991	NA	NA	NA	NA	Mitochondrial DNA copy number	Mitochondrial DNA copy number || ||	TRUE	igd
100	rs5742915	15	74336633	0.0023	0.0021	383476	0.2781	NA	C	T	Mitochondrial DNA copy number || id:ebi-a-GCST90026372	ebi-a-GCST90026372	FALSE	rs5742915	rs5742915	NA	NA	NA	NA	Mitochondrial DNA copy number	Mitochondrial DNA copy number || ||	TRUE	igd
101	rs7164950	15	56775385	-0.0018	0.0021	383476	0.4055	NA	G	A	Mitochondrial DNA copy number || id:ebi-a-GCST90026372	ebi-a-GCST90026372	FALSE	rs7164950	rs7164950	NA	NA	NA	NA	Mitochondrial DNA copy number	Mitochondrial DNA copy number || ||	TRUE	igd
102	rs11412296	15	50366116	-0.0099	0.0025	383476	5.95799e-05	NA	TA	T	Mitochondrial DNA copy number || id:ebi-a-GCST90026372	ebi-a-GCST90026372	FALSE	rs11412296	rs11412296	NA	NA	NA	NA	Mitochondrial DNA copy number	Mitochondrial DNA copy number || ||	TRUE	igd
103	rs80116508	16	3650970	0.001	0.0044	383476	0.8254	NA	A	G	Mitochondrial DNA copy number || id:ebi-a-GCST90026372	ebi-a-GCST90026372	FALSE	rs80116508	rs80116508	NA	NA	NA	NA	Mitochondrial DNA copy number	Mitochondrial DNA copy number || ||	TRUE	igd
104	rs76219171	16	50188929	0.0025	0.0045	383476	0.574101	NA	A	G	Mitochondrial DNA copy number || id:ebi-a-GCST90026372	ebi-a-GCST90026372	FALSE	rs76219171	rs76219171	NA	NA	NA	NA	Mitochondrial DNA copy number	Mitochondrial DNA copy number || ||	TRUE	igd
105	rs2967355	16	82200103	-0.0009	0.0025	383476	0.7213	NA	C	A	Mitochondrial DNA copy number || id:ebi-a-GCST90026372	ebi-a-GCST90026372	FALSE	rs2967355	rs2967355	NA	NA	NA	NA	Mitochondrial DNA copy number	Mitochondrial DNA copy number || ||	TRUE	igd
106	rs12925933	16	90141355	-0.0025	0.0023	383476	0.2584	NA	C	A	Mitochondrial DNA copy number || id:ebi-a-GCST90026372	ebi-a-GCST90026372	FALSE	rs12925933	rs12925933	NA	NA	NA	NA	Mitochondrial DNA copy number	Mitochondrial DNA copy number || ||	TRUE	igd
107	rs111950327	16	48283993	0.0019	0.0043	383476	0.653501	NA	C	G	Mitochondrial DNA copy number || id:ebi-a-GCST90026372	ebi-a-GCST90026372	FALSE	rs111950327	rs111950327	NA	NA	NA	NA	Mitochondrial DNA copy number	Mitochondrial DNA copy number || ||	TRUE	igd
108	rs450962	16	28413517	0.0051	0.0026	383476	0.0455795	NA	G	A	Mitochondrial DNA copy number || id:ebi-a-GCST90026372	ebi-a-GCST90026372	FALSE	rs450962	rs450962	NA	NA	NA	NA	Mitochondrial DNA copy number	Mitochondrial DNA copy number || ||	TRUE	igd
109	rs3785074	16	69406986	0.0012	0.0023	383476	0.5938	NA	G	A	Mitochondrial DNA copy number || id:ebi-a-GCST90026372	ebi-a-GCST90026372	FALSE	rs3785074	rs3785074	NA	NA	NA	NA	Mitochondrial DNA copy number	Mitochondrial DNA copy number || ||	TRUE	igd
110	rs76065543	16	74678063	0.0032	0.003	383476	0.2934	NA	T	C	Mitochondrial DNA copy number || id:ebi-a-GCST90026372	ebi-a-GCST90026372	FALSE	rs76065543	rs76065543	NA	NA	NA	NA	Mitochondrial DNA copy number	Mitochondrial DNA copy number || ||	TRUE	igd
111	rs12932179	16	9072085	-0.0049	0.0021	383476	0.02229	NA	G	A	Mitochondrial DNA copy number || id:ebi-a-GCST90026372	ebi-a-GCST90026372	FALSE	rs12932179	rs12932179	NA	NA	NA	NA	Mitochondrial DNA copy number	Mitochondrial DNA copy number || ||	TRUE	igd
112	rs182059586	16	14652220	-0.0095	0.007	383476	0.1784	NA	C	T	Mitochondrial DNA copy number || id:ebi-a-GCST90026372	ebi-a-GCST90026372	FALSE	rs182059586	rs182059586	NA	NA	NA	NA	Mitochondrial DNA copy number	Mitochondrial DNA copy number || ||	TRUE	igd
113	rs11117354	16	88092092	-0.0037	0.0023	383476	0.1146	NA	C	T	Mitochondrial DNA copy number || id:ebi-a-GCST90026372	ebi-a-GCST90026372	FALSE	rs11117354	rs11117354	NA	NA	NA	NA	Mitochondrial DNA copy number	Mitochondrial DNA copy number || ||	TRUE	igd
114	rs9940099	16	3613207	-0.0077	0.0093	383476	0.4078	NA	A	G	Mitochondrial DNA copy number || id:ebi-a-GCST90026372	ebi-a-GCST90026372	FALSE	rs9940099	rs9940099	NA	NA	NA	NA	Mitochondrial DNA copy number	Mitochondrial DNA copy number || ||	TRUE	igd
115	rs56061761	16	70187811	-0.0023	0.0023	383476	0.3197	NA	A	G	Mitochondrial DNA copy number || id:ebi-a-GCST90026372	ebi-a-GCST90026372	FALSE	rs56061761	rs56061761	NA	NA	NA	NA	Mitochondrial DNA copy number	Mitochondrial DNA copy number || ||	TRUE	igd
116	rs4724	17	7760397	-0.0016	0.0034	383476	0.636	NA	A	G	Mitochondrial DNA copy number || id:ebi-a-GCST90026372	ebi-a-GCST90026372	FALSE	rs4724	rs4724	NA	NA	NA	NA	Mitochondrial DNA copy number	Mitochondrial DNA copy number || ||	TRUE	igd
117	rs12451892	17	2247982	-0.0066	0.0022	383476	0.00273401	NA	C	T	Mitochondrial DNA copy number || id:ebi-a-GCST90026372	ebi-a-GCST90026372	FALSE	rs12451892	rs12451892	NA	NA	NA	NA	Mitochondrial DNA copy number	Mitochondrial DNA copy number || ||	TRUE	igd
118	rs7209057	17	65705530	0.0047	0.0021	383476	0.0283798	NA	A	G	Mitochondrial DNA copy number || id:ebi-a-GCST90026372	ebi-a-GCST90026372	FALSE	rs7209057	rs7209057	NA	NA	NA	NA	Mitochondrial DNA copy number	Mitochondrial DNA copy number || ||	TRUE	igd
119	rs59409453	17	1666218	0.0053	0.0024	383476	0.0284997	NA	G	A	Mitochondrial DNA copy number || id:ebi-a-GCST90026372	ebi-a-GCST90026372	FALSE	rs59409453	rs59409453	NA	NA	NA	NA	Mitochondrial DNA copy number	Mitochondrial DNA copy number || ||	TRUE	igd
120	rs111527438	17	29252703	0.0083	0.0022	383476	0.000153402	NA	C	T	Mitochondrial DNA copy number || id:ebi-a-GCST90026372	ebi-a-GCST90026372	FALSE	rs111527438	rs111527438	NA	NA	NA	NA	Mitochondrial DNA copy number	Mitochondrial DNA copy number || ||	TRUE	igd
121	rs7221585	17	76195153	0.001	0.0026	383476	0.7105	NA	T	C	Mitochondrial DNA copy number || id:ebi-a-GCST90026372	ebi-a-GCST90026372	FALSE	rs7221585	rs7221585	NA	NA	NA	NA	Mitochondrial DNA copy number	Mitochondrial DNA copy number || ||	TRUE	igd
122	rs75664430	17	8064779	-0.0015	0.0024	383476	0.5416	NA	G	C	Mitochondrial DNA copy number || id:ebi-a-GCST90026372	ebi-a-GCST90026372	FALSE	rs75664430	rs75664430	NA	NA	NA	NA	Mitochondrial DNA copy number	Mitochondrial DNA copy number || ||	TRUE	igd
123	rs56799554	17	41456413	-0.0041	0.0028	383476	0.1449	NA	G	A	Mitochondrial DNA copy number || id:ebi-a-GCST90026372	ebi-a-GCST90026372	FALSE	rs56799554	rs56799554	NA	NA	NA	NA	Mitochondrial DNA copy number	Mitochondrial DNA copy number || ||	TRUE	igd
124	rs144204502	17	76183233	-0.0276	0.0096	383476	0.00396397	NA	T	C	Mitochondrial DNA copy number || id:ebi-a-GCST90026372	ebi-a-GCST90026372	FALSE	rs144204502	rs144204502	NA	NA	NA	NA	Mitochondrial DNA copy number	Mitochondrial DNA copy number || ||	TRUE	igd
125	rs150150565	18	708207	0.0145	0.0077	383476	0.0578296	NA	T	C	Mitochondrial DNA copy number || id:ebi-a-GCST90026372	ebi-a-GCST90026372	FALSE	rs150150565	rs150150565	NA	NA	NA	NA	Mitochondrial DNA copy number	Mitochondrial DNA copy number || ||	TRUE	igd
126	rs116863223	18	709396	-0.0053	0.0096	383476	0.5813	NA	A	G	Mitochondrial DNA copy number || id:ebi-a-GCST90026372	ebi-a-GCST90026372	FALSE	rs116863223	rs116863223	NA	NA	NA	NA	Mitochondrial DNA copy number	Mitochondrial DNA copy number || ||	TRUE	igd
127	rs16978028	18	42070981	-0.0127	0.003	383476	2.717e-05	NA	T	A	Mitochondrial DNA copy number || id:ebi-a-GCST90026372	ebi-a-GCST90026372	FALSE	rs16978028	rs16978028	NA	NA	NA	NA	Mitochondrial DNA copy number	Mitochondrial DNA copy number || ||	TRUE	igd
128	rs2276182	18	51798047	0.0029	0.0022	383476	0.1824	NA	G	C	Mitochondrial DNA copy number || id:ebi-a-GCST90026372	ebi-a-GCST90026372	FALSE	rs2276182	rs2276182	NA	NA	NA	NA	Mitochondrial DNA copy number	Mitochondrial DNA copy number || ||	TRUE	igd
129	rs9955360	18	78008334	0.0053	0.0032	383476	0.0986211	NA	A	C	Mitochondrial DNA copy number || id:ebi-a-GCST90026372	ebi-a-GCST90026372	FALSE	rs9955360	rs9955360	NA	NA	NA	NA	Mitochondrial DNA copy number	Mitochondrial DNA copy number || ||	TRUE	igd
130	rs3891167	18	658423	-0.0028	0.0025	383476	0.266	NA	G	A	Mitochondrial DNA copy number || id:ebi-a-GCST90026372	ebi-a-GCST90026372	FALSE	rs3891167	rs3891167	NA	NA	NA	NA	Mitochondrial DNA copy number	Mitochondrial DNA copy number || ||	TRUE	igd
131	rs139669835	18	729871	-0.0099	0.0115	383476	0.3876	NA	T	C	Mitochondrial DNA copy number || id:ebi-a-GCST90026372	ebi-a-GCST90026372	FALSE	rs139669835	rs139669835	NA	NA	NA	NA	Mitochondrial DNA copy number	Mitochondrial DNA copy number || ||	TRUE	igd
132	rs11085072	19	4368142	-0.0046	0.0025	383476	0.0648605	NA	T	C	Mitochondrial DNA copy number || id:ebi-a-GCST90026372	ebi-a-GCST90026372	FALSE	rs11085072	rs11085072	NA	NA	NA	NA	Mitochondrial DNA copy number	Mitochondrial DNA copy number || ||	TRUE	igd
133	rs4530278	19	33752994	0.0002	0.0022	383476	0.9398	NA	T	G	Mitochondrial DNA copy number || id:ebi-a-GCST90026372	ebi-a-GCST90026372	FALSE	rs4530278	rs4530278	NA	NA	NA	NA	Mitochondrial DNA copy number	Mitochondrial DNA copy number || ||	TRUE	igd
134	rs8105767	19	22215441	0.0058	0.0023	383476	0.01323	NA	G	A	Mitochondrial DNA copy number || id:ebi-a-GCST90026372	ebi-a-GCST90026372	FALSE	rs8105767	rs8105767	NA	NA	NA	NA	Mitochondrial DNA copy number	Mitochondrial DNA copy number || ||	TRUE	igd
135	rs429358	19	45411941	-0.0131	0.0029	383476	7.52593e-06	NA	C	T	Mitochondrial DNA copy number || id:ebi-a-GCST90026372	ebi-a-GCST90026372	FALSE	rs429358	rs429358	NA	NA	NA	NA	Mitochondrial DNA copy number	Mitochondrial DNA copy number || ||	TRUE	igd
136	rs8102497	19	57370055	0.0016	0.0022	383476	0.4667	NA	A	G	Mitochondrial DNA copy number || id:ebi-a-GCST90026372	ebi-a-GCST90026372	FALSE	rs8102497	rs8102497	NA	NA	NA	NA	Mitochondrial DNA copy number	Mitochondrial DNA copy number || ||	TRUE	igd
137	rs142426306	20	62488152	0.0011	0.0056	383476	0.8427	NA	T	C	Mitochondrial DNA copy number || id:ebi-a-GCST90026372	ebi-a-GCST90026372	FALSE	rs142426306	rs142426306	NA	NA	NA	NA	Mitochondrial DNA copy number	Mitochondrial DNA copy number || ||	TRUE	igd
138	rs1291143	20	35525640	0.0041	0.003	383476	0.1726	NA	C	A	Mitochondrial DNA copy number || id:ebi-a-GCST90026372	ebi-a-GCST90026372	FALSE	rs1291143	rs1291143	NA	NA	NA	NA	Mitochondrial DNA copy number	Mitochondrial DNA copy number || ||	TRUE	igd
139	rs6054257	20	66370	0.0014	0.0026	383476	0.5825	NA	A	G	Mitochondrial DNA copy number || id:ebi-a-GCST90026372	ebi-a-GCST90026372	FALSE	rs6054257	rs6054257	NA	NA	NA	NA	Mitochondrial DNA copy number	Mitochondrial DNA copy number || ||	TRUE	igd
140	rs35640778	20	62321128	-0.0099	0.0073	383476	0.1719	NA	A	G	Mitochondrial DNA copy number || id:ebi-a-GCST90026372	ebi-a-GCST90026372	FALSE	rs35640778	rs35640778	NA	NA	NA	NA	Mitochondrial DNA copy number	Mitochondrial DNA copy number || ||	TRUE	igd
141	rs143190905	20	62291767	-0.0109	0.004	383476	0.00660207	NA	T	G	Mitochondrial DNA copy number || id:ebi-a-GCST90026372	ebi-a-GCST90026372	FALSE	rs143190905	rs143190905	NA	NA	NA	NA	Mitochondrial DNA copy number	Mitochondrial DNA copy number || ||	TRUE	igd
142	rs41304832	20	62375508	0.0089	0.0104	383476	0.3931	NA	A	G	Mitochondrial DNA copy number || id:ebi-a-GCST90026372	ebi-a-GCST90026372	FALSE	rs41304832	rs41304832	NA	NA	NA	NA	Mitochondrial DNA copy number	Mitochondrial DNA copy number || ||	TRUE	igd
143	rs117512405	20	62574274	-0.0147	0.0085	383476	0.0843898	NA	A	G	Mitochondrial DNA copy number || id:ebi-a-GCST90026372	ebi-a-GCST90026372	FALSE	rs117512405	rs117512405	NA	NA	NA	NA	Mitochondrial DNA copy number	Mitochondrial DNA copy number || ||	TRUE	igd
144	rs28502153	22	17469049	-0.0002	0.0022	383476	0.9316	NA	A	C	Mitochondrial DNA copy number || id:ebi-a-GCST90026372	ebi-a-GCST90026372	FALSE	rs28502153	rs28502153	NA	NA	NA	NA	Mitochondrial DNA copy number	Mitochondrial DNA copy number || ||	TRUE	igd
145	rs6007020	22	45790132	0.0021	0.0022	383476	0.3399	NA	C	T	Mitochondrial DNA copy number || id:ebi-a-GCST90026372	ebi-a-GCST90026372	FALSE	rs6007020	rs6007020	NA	NA	NA	NA	Mitochondrial DNA copy number	Mitochondrial DNA copy number || ||	TRUE	igd
146	rs131797	22	50971631	-0.0113	0.0025	383476	5.14198e-06	NA	TAAAAA	T	Mitochondrial DNA copy number || id:ebi-a-GCST90026372	ebi-a-GCST90026372	FALSE	rs131797	rs131797	NA	NA	NA	NA	Mitochondrial DNA copy number	Mitochondrial DNA copy number || ||	TRUE	igd
147	rs1003322	22	51072289	0.0063	0.0026	383476	0.0153299	NA	A	C	Mitochondrial DNA copy number || id:ebi-a-GCST90026372	ebi-a-GCST90026372	FALSE	rs1003322	rs1003322	NA	NA	NA	NA	Mitochondrial DNA copy number	Mitochondrial DNA copy number || ||	TRUE	igd
