# Supplementary material for: New insights from bidirectional Mendelian randomization: causal relationships between telomere length and mitochondrial DNA copy number in aging biomarkers
Source: Aging (Albany NY). 2024 Apr 24;16(8):7387–404. doi: 10.18632/aging.205765 (PMC11087129; doi:10.18632/aging.205765)
Supplement: Supplementary Table 6 [file aging-16-205765-s007.xlsx]

## Sheet: Table s6 IVs involved in MR ana
Supplementary Table 6. IVs involved in MR analysis between TL as exposure and mtDNA copy number as outcome.
	SNP	effect_allele.exposure	other_allele.exposure	effect_allele.outcome	other_allele.outcome	beta.exposure	beta.outcome	eaf.exposure	eaf.outcome	remove	palindromic	ambiguous	id.outcome	chr	pos	se.outcome	samplesize.outcome	pval.outcome	outcome	proxy.outcome	target_snp.outcome	proxy_snp.outcome	target_a1.outcome	target_a2.outcome	proxy_a1.outcome	proxy_a2.outcome	originalname.outcome	outcome.deprecated	mr_keep.outcome	data_source.outcome	chr.exposure	pos.exposure	se.exposure	pval.exposure	samplesize.exposure	id.exposure	exposure	mr_keep.exposure	pval_origin.exposure	data_source.exposure	action	mr_keep
1	rs1003322	A	C	A	C	0.0141734	0.0063	0.213742	NA	FALSE	FALSE	FALSE	ebi-a-GCST90026372	22	51072289	0.0026	383476	0.0153299	Mitochondrial DNA copy number || id:ebi-a-GCST90026372	FALSE	rs1003322	rs1003322	NA	NA	NA	NA	Mitochondrial DNA copy number	Mitochondrial DNA copy number || ||	TRUE	igd	22	51072289	0.00247546	1e-08	472174	ieu-b-4879	telomere length || id:ieu-b-4879	TRUE	reported	igd	2	TRUE
2	rs10112752	A	G	A	G	-0.0287522	0.0002	0.430369	NA	FALSE	FALSE	FALSE	ebi-a-GCST90026372	8	73958718	0.0021	383476	0.9256	Mitochondrial DNA copy number || id:ebi-a-GCST90026372	FALSE	rs10112752	rs10112752	NA	NA	NA	NA	Mitochondrial DNA copy number	Mitochondrial DNA copy number || ||	TRUE	igd	8	73958718	0.00202518	9.5e-46	472174	ieu-b-4879	telomere length || id:ieu-b-4879	TRUE	reported	igd	2	TRUE
3	rs1023767	A	G	A	G	-0.0183732	-0.0035	0.237595	NA	FALSE	FALSE	FALSE	ebi-a-GCST90026372	8	95530969	0.0025	383476	0.1637	Mitochondrial DNA copy number || id:ebi-a-GCST90026372	FALSE	rs1023767	rs1023767	NA	NA	NA	NA	Mitochondrial DNA copy number	Mitochondrial DNA copy number || ||	TRUE	igd	8	95530969	0.00234772	5e-15	472174	ieu-b-4879	telomere length || id:ieu-b-4879	TRUE	reported	igd	2	TRUE
4	rs10773176	G	A	G	A	-0.0172009	-0.0006	0.741214	NA	FALSE	FALSE	FALSE	ebi-a-GCST90026372	12	122944713	0.0024	383476	0.7887	Mitochondrial DNA copy number || id:ebi-a-GCST90026372	FALSE	rs10773176	rs10773176	NA	NA	NA	NA	Mitochondrial DNA copy number	Mitochondrial DNA copy number || ||	TRUE	igd	12	122944713	0.00228534	5.2e-14	472174	ieu-b-4879	telomere length || id:ieu-b-4879	TRUE	reported	igd	2	TRUE
5	rs10774624	A	G	A	G	0.0149944	-0.0039	0.53276	NA	FALSE	FALSE	FALSE	ebi-a-GCST90026372	12	111833788	0.0021	383476	0.0664401	Mitochondrial DNA copy number || id:ebi-a-GCST90026372	FALSE	rs10774624	rs10774624	NA	NA	NA	NA	Mitochondrial DNA copy number	Mitochondrial DNA copy number || ||	TRUE	igd	12	111833788	0.00205494	2.9e-13	472174	ieu-b-4879	telomere length || id:ieu-b-4879	TRUE	reported	igd	2	TRUE
6	rs10805346	C	T	C	T	0.0117072	0.0007	0.439339	NA	FALSE	FALSE	FALSE	ebi-a-GCST90026372	4	9920347	0.0021	383476	0.752801	Mitochondrial DNA copy number || id:ebi-a-GCST90026372	FALSE	rs10805346	rs10805346	NA	NA	NA	NA	Mitochondrial DNA copy number	Mitochondrial DNA copy number || ||	TRUE	igd	4	9920347	0.00202147	7e-09	472174	ieu-b-4879	telomere length || id:ieu-b-4879	TRUE	reported	igd	2	TRUE
7	rs10845387	A	G	A	G	-0.0141214	-0.0004	0.352666	NA	FALSE	FALSE	FALSE	ebi-a-GCST90026372	12	11757743	0.0022	383476	0.8398	Mitochondrial DNA copy number || id:ebi-a-GCST90026372	FALSE	rs10845387	rs10845387	NA	NA	NA	NA	Mitochondrial DNA copy number	Mitochondrial DNA copy number || ||	TRUE	igd	12	11757743	0.00209396	1.5e-11	472174	ieu-b-4879	telomere length || id:ieu-b-4879	TRUE	reported	igd	2	TRUE
8	rs10905255	T	G	T	G	-0.0182493	-0.0016	0.57919	NA	FALSE	FALSE	FALSE	ebi-a-GCST90026372	10	5870267	0.0021	383476	0.4426	Mitochondrial DNA copy number || id:ebi-a-GCST90026372	FALSE	rs10905255	rs10905255	NA	NA	NA	NA	Mitochondrial DNA copy number	Mitochondrial DNA copy number || ||	TRUE	igd	10	5870267	0.00203099	2.6e-19	472174	ieu-b-4879	telomere length || id:ieu-b-4879	TRUE	reported	igd	2	TRUE
9	rs11085072	T	C	T	C	-0.0131806	-0.0046	0.236909	NA	FALSE	FALSE	FALSE	ebi-a-GCST90026372	19	4368142	0.0025	383476	0.0648605	Mitochondrial DNA copy number || id:ebi-a-GCST90026372	FALSE	rs11085072	rs11085072	NA	NA	NA	NA	Mitochondrial DNA copy number	Mitochondrial DNA copy number || ||	TRUE	igd	19	4368142	0.00236713	2.6e-08	472174	ieu-b-4879	telomere length || id:ieu-b-4879	TRUE	reported	igd	2	TRUE
10	rs11117354	C	T	C	T	0.0232506	-0.0037	0.696513	NA	FALSE	FALSE	FALSE	ebi-a-GCST90026372	16	88092092	0.0023	383476	0.1146	Mitochondrial DNA copy number || id:ebi-a-GCST90026372	FALSE	rs11117354	rs11117354	NA	NA	NA	NA	Mitochondrial DNA copy number	Mitochondrial DNA copy number || ||	TRUE	igd	16	88092092	0.00219601	3.4e-26	472174	ieu-b-4879	telomere length || id:ieu-b-4879	TRUE	reported	igd	2	TRUE
11	rs11212631	C	T	C	T	-0.0193458	0.0017	0.199229	NA	FALSE	FALSE	FALSE	ebi-a-GCST90026372	11	108304509	0.0027	383476	0.5147	Mitochondrial DNA copy number || id:ebi-a-GCST90026372	FALSE	rs11212631	rs11212631	NA	NA	NA	NA	Mitochondrial DNA copy number	Mitochondrial DNA copy number || ||	TRUE	igd	11	108304509	0.00256554	4.7e-14	472174	ieu-b-4879	telomere length || id:ieu-b-4879	TRUE	reported	igd	2	TRUE
12	rs113525195	A	C	A	C	-0.0124075	-0.0014	0.290254	NA	FALSE	FALSE	FALSE	ebi-a-GCST90026372	14	23499321	0.0024	383476	0.56	Mitochondrial DNA copy number || id:ebi-a-GCST90026372	FALSE	rs113525195	rs113525195	NA	NA	NA	NA	Mitochondrial DNA copy number	Mitochondrial DNA copy number || ||	TRUE	igd	14	23499321	0.00224132	3.1e-08	472174	ieu-b-4879	telomere length || id:ieu-b-4879	TRUE	reported	igd	2	TRUE
13	rs11426156	T	TA	T	TA	-0.0115882	0.0035	0.399525	NA	FALSE	FALSE	FALSE	ebi-a-GCST90026372	3	128318179	0.0022	383476	0.1092	Mitochondrial DNA copy number || id:ebi-a-GCST90026372	FALSE	rs11426156	rs11426156	NA	NA	NA	NA	Mitochondrial DNA copy number	Mitochondrial DNA copy number || ||	TRUE	igd	3	128318179	0.0020709	2.2e-08	472174	ieu-b-4879	telomere length || id:ieu-b-4879	TRUE	reported	igd	2	TRUE
14	rs11557154	T	C	T	C	-0.0343719	0.0006	0.13003	NA	FALSE	FALSE	FALSE	ebi-a-GCST90026372	9	34107505	0.0032	383476	0.8534	Mitochondrial DNA copy number || id:ebi-a-GCST90026372	FALSE	rs11557154	rs11557154	NA	NA	NA	NA	Mitochondrial DNA copy number	Mitochondrial DNA copy number || ||	TRUE	igd	9	34107505	0.00298538	1.1e-30	472174	ieu-b-4879	telomere length || id:ieu-b-4879	TRUE	reported	igd	2	TRUE
15	rs11579626	C	A	C	A	0.0265113	0.0036	0.084882	NA	FALSE	FALSE	FALSE	ebi-a-GCST90026372	1	146741960	0.0038	383476	0.3445	Mitochondrial DNA copy number || id:ebi-a-GCST90026372	FALSE	rs11579626	rs11579626	NA	NA	NA	NA	Mitochondrial DNA copy number	Mitochondrial DNA copy number || ||	TRUE	igd	1	146741960	0.00357752	1.3e-13	472174	ieu-b-4879	telomere length || id:ieu-b-4879	TRUE	reported	igd	2	TRUE
16	rs11584821	T	C	T	C	-0.0306517	-0.0017	0.176208	NA	FALSE	FALSE	FALSE	ebi-a-GCST90026372	1	114419489	0.0028	383476	0.541101	Mitochondrial DNA copy number || id:ebi-a-GCST90026372	FALSE	rs11584821	rs11584821	NA	NA	NA	NA	Mitochondrial DNA copy number	Mitochondrial DNA copy number || ||	TRUE	igd	1	114419489	0.00263623	3e-31	472174	ieu-b-4879	telomere length || id:ieu-b-4879	TRUE	reported	igd	2	TRUE
17	rs116863223	A	G	A	G	-0.0817874	-0.0053	0.011763	NA	FALSE	FALSE	FALSE	ebi-a-GCST90026372	18	709396	0.0096	383476	0.5813	Mitochondrial DNA copy number || id:ebi-a-GCST90026372	FALSE	rs116863223	rs116863223	NA	NA	NA	NA	Mitochondrial DNA copy number	Mitochondrial DNA copy number || ||	TRUE	igd	18	709396	0.00937157	2.6e-18	472174	ieu-b-4879	telomere length || id:ieu-b-4879	TRUE	reported	igd	2	TRUE
18	rs117034449	A	G	A	G	0.0374377	0.0187	0.023304	NA	FALSE	FALSE	FALSE	ebi-a-GCST90026372	10	103855348	0.0069	383476	0.00678	Mitochondrial DNA copy number || id:ebi-a-GCST90026372	FALSE	rs117034449	rs117034449	NA	NA	NA	NA	Mitochondrial DNA copy number	Mitochondrial DNA copy number || ||	TRUE	igd	10	103855348	0.00667898	2.1e-08	472174	ieu-b-4879	telomere length || id:ieu-b-4879	TRUE	reported	igd	2	TRUE
19	rs117407747	T	C	T	C	0.0450533	0.0061	0.027571	NA	FALSE	FALSE	FALSE	ebi-a-GCST90026372	7	159117178	0.0063	383476	0.331	Mitochondrial DNA copy number || id:ebi-a-GCST90026372	FALSE	rs117407747	rs117407747	NA	NA	NA	NA	Mitochondrial DNA copy number	Mitochondrial DNA copy number || ||	TRUE	igd	7	159117178	0.00611706	1.8e-13	472174	ieu-b-4879	telomere length || id:ieu-b-4879	TRUE	reported	igd	2	TRUE
20	rs117512405	A	G	A	G	-0.0790134	-0.0147	0.017043	NA	FALSE	FALSE	FALSE	ebi-a-GCST90026372	20	62574274	0.0085	383476	0.0843898	Mitochondrial DNA copy number || id:ebi-a-GCST90026372	FALSE	rs117512405	rs117512405	NA	NA	NA	NA	Mitochondrial DNA copy number	Mitochondrial DNA copy number || ||	TRUE	igd	20	62574274	0.00824611	9.5e-22	472174	ieu-b-4879	telomere length || id:ieu-b-4879	TRUE	reported	igd	2	TRUE
21	rs117630647	A	G	A	G	0.059565	0.0018	0.021346	NA	FALSE	FALSE	FALSE	ebi-a-GCST90026372	7	124779510	0.0074	383476	0.8077	Mitochondrial DNA copy number || id:ebi-a-GCST90026372	FALSE	rs117630647	rs117630647	NA	NA	NA	NA	Mitochondrial DNA copy number	Mitochondrial DNA copy number || ||	TRUE	igd	7	124779510	0.00720413	1.4e-16	472174	ieu-b-4879	telomere length || id:ieu-b-4879	TRUE	reported	igd	2	TRUE
22	rs12369950	C	T	C	T	-0.0178308	-0.0041	0.140675	NA	FALSE	FALSE	FALSE	ebi-a-GCST90026372	12	24762109	0.0031	383476	0.1863	Mitochondrial DNA copy number || id:ebi-a-GCST90026372	FALSE	rs12369950	rs12369950	NA	NA	NA	NA	Mitochondrial DNA copy number	Mitochondrial DNA copy number || ||	TRUE	igd	12	24762109	0.00290205	8e-10	472174	ieu-b-4879	telomere length || id:ieu-b-4879	TRUE	reported	igd	2	TRUE
23	rs12412214	A	G	A	G	-0.0245174	-0.0061	0.279765	NA	FALSE	FALSE	FALSE	ebi-a-GCST90026372	10	101276256	0.0023	383476	0.009448	Mitochondrial DNA copy number || id:ebi-a-GCST90026372	FALSE	rs12412214	rs12412214	NA	NA	NA	NA	Mitochondrial DNA copy number	Mitochondrial DNA copy number || ||	TRUE	igd	10	101276256	0.00222685	3.4e-28	472174	ieu-b-4879	telomere length || id:ieu-b-4879	TRUE	reported	igd	2	TRUE
24	rs12451892	C	T	C	T	-0.0116145	-0.0066	0.380511	NA	FALSE	FALSE	FALSE	ebi-a-GCST90026372	17	2247982	0.0022	383476	0.00273401	Mitochondrial DNA copy number || id:ebi-a-GCST90026372	FALSE	rs12451892	rs12451892	NA	NA	NA	NA	Mitochondrial DNA copy number	Mitochondrial DNA copy number || ||	TRUE	igd	17	2247982	0.00207578	2.2e-08	472174	ieu-b-4879	telomere length || id:ieu-b-4879	TRUE	reported	igd	2	TRUE
25	rs1291143	C	A	C	A	0.0493145	0.0041	0.849026	NA	FALSE	FALSE	FALSE	ebi-a-GCST90026372	20	35525640	0.003	383476	0.1726	Mitochondrial DNA copy number || id:ebi-a-GCST90026372	FALSE	rs1291143	rs1291143	NA	NA	NA	NA	Mitochondrial DNA copy number	Mitochondrial DNA copy number || ||	TRUE	igd	20	35525640	0.0027991	1.8e-69	472174	ieu-b-4879	telomere length || id:ieu-b-4879	TRUE	reported	igd	2	TRUE
26	rs12925933	C	A	C	A	-0.0146622	-0.0025	0.66221	NA	FALSE	FALSE	FALSE	ebi-a-GCST90026372	16	90141355	0.0023	383476	0.2584	Mitochondrial DNA copy number || id:ebi-a-GCST90026372	FALSE	rs12925933	rs12925933	NA	NA	NA	NA	Mitochondrial DNA copy number	Mitochondrial DNA copy number || ||	TRUE	igd	16	90141355	0.00213796	7e-12	472174	ieu-b-4879	telomere length || id:ieu-b-4879	TRUE	reported	igd	2	TRUE
27	rs12932179	G	A	G	A	-0.0136257	-0.0049	0.561399	NA	FALSE	FALSE	FALSE	ebi-a-GCST90026372	16	9072085	0.0021	383476	0.02229	Mitochondrial DNA copy number || id:ebi-a-GCST90026372	FALSE	rs12932179	rs12932179	NA	NA	NA	NA	Mitochondrial DNA copy number	Mitochondrial DNA copy number || ||	TRUE	igd	16	9072085	0.0020276	1.8e-11	472174	ieu-b-4879	telomere length || id:ieu-b-4879	TRUE	reported	igd	2	TRUE
28	rs13062095	C	T	C	T	0.0138552	0.0006	0.327843	NA	FALSE	FALSE	FALSE	ebi-a-GCST90026372	3	101267385	0.0022	383476	0.7962	Mitochondrial DNA copy number || id:ebi-a-GCST90026372	FALSE	rs13062095	rs13062095	NA	NA	NA	NA	Mitochondrial DNA copy number	Mitochondrial DNA copy number || ||	TRUE	igd	3	101267385	0.00214113	9.7e-11	472174	ieu-b-4879	telomere length || id:ieu-b-4879	TRUE	reported	igd	2	TRUE
29	rs13230646	C	T	C	T	-0.0173277	0.0001	0.248945	NA	FALSE	FALSE	FALSE	ebi-a-GCST90026372	7	23930316	0.0024	383476	0.9725	Mitochondrial DNA copy number || id:ebi-a-GCST90026372	FALSE	rs13230646	rs13230646	NA	NA	NA	NA	Mitochondrial DNA copy number	Mitochondrial DNA copy number || ||	TRUE	igd	7	23930316	0.00232377	8.9e-14	472174	ieu-b-4879	telomere length || id:ieu-b-4879	TRUE	reported	igd	2	TRUE
30	rs1332941	G	A	G	A	0.0256552	0.0003	0.820466	NA	FALSE	FALSE	FALSE	ebi-a-GCST90026372	13	41734190	0.0029	383476	0.9174	Mitochondrial DNA copy number || id:ebi-a-GCST90026372	TRUE	rs1332941	rs9532732	A	G	C	T	Mitochondrial DNA copy number	Mitochondrial DNA copy number || ||	TRUE	igd	13	41695100	0.00273159	5.9e-21	472174	ieu-b-4879	telomere length || id:ieu-b-4879	TRUE	reported	igd	2	TRUE
31	rs137901416	A	G	A	G	0.04572	0.0039	0.100311	NA	FALSE	FALSE	FALSE	ebi-a-GCST90026372	14	73418095	0.0035	383476	0.2593	Mitochondrial DNA copy number || id:ebi-a-GCST90026372	FALSE	rs137901416	rs137901416	NA	NA	NA	NA	Mitochondrial DNA copy number	Mitochondrial DNA copy number || ||	TRUE	igd	14	73418095	0.00332355	4.7e-43	472174	ieu-b-4879	telomere length || id:ieu-b-4879	TRUE	reported	igd	2	TRUE
32	rs139669835	T	C	T	C	-0.0612563	-0.0099	0.009365	NA	FALSE	FALSE	FALSE	ebi-a-GCST90026372	18	729871	0.0115	383476	0.3876	Mitochondrial DNA copy number || id:ebi-a-GCST90026372	FALSE	rs139669835	rs139669835	NA	NA	NA	NA	Mitochondrial DNA copy number	Mitochondrial DNA copy number || ||	TRUE	igd	18	729871	0.0105346	6.1e-09	472174	ieu-b-4879	telomere length || id:ieu-b-4879	TRUE	reported	igd	2	TRUE
33	rs139795227	C	A	C	A	0.0599379	-0.0165	0.014021	NA	FALSE	FALSE	FALSE	ebi-a-GCST90026372	1	92842367	0.0089	383476	0.0648396	Mitochondrial DNA copy number || id:ebi-a-GCST90026372	FALSE	rs139795227	rs139795227	NA	NA	NA	NA	Mitochondrial DNA copy number	Mitochondrial DNA copy number || ||	TRUE	igd	1	92842367	0.00873247	6.7e-12	472174	ieu-b-4879	telomere length || id:ieu-b-4879	TRUE	reported	igd	2	TRUE
34	rs141214782	TTATC	T	TTATC	T	-0.0246687	0.0002	0.101206	NA	FALSE	FALSE	FALSE	ebi-a-GCST90026372	5	78954683	0.0036	383476	0.9623	Mitochondrial DNA copy number || id:ebi-a-GCST90026372	FALSE	rs141214782	rs141214782	NA	NA	NA	NA	Mitochondrial DNA copy number	Mitochondrial DNA copy number || ||	TRUE	igd	5	78954683	0.00335723	2e-13	472174	ieu-b-4879	telomere length || id:ieu-b-4879	TRUE	reported	igd	2	TRUE
35	rs142426306	T	C	T	C	-0.0504903	0.0011	0.039544	NA	FALSE	FALSE	FALSE	ebi-a-GCST90026372	20	62488152	0.0056	383476	0.8427	Mitochondrial DNA copy number || id:ebi-a-GCST90026372	FALSE	rs142426306	rs142426306	NA	NA	NA	NA	Mitochondrial DNA copy number	Mitochondrial DNA copy number || ||	TRUE	igd	20	62488152	0.00539933	8.7e-21	472174	ieu-b-4879	telomere length || id:ieu-b-4879	TRUE	reported	igd	2	TRUE
36	rs143190905	T	G	T	G	-0.0723995	-0.0109	0.080404	NA	FALSE	FALSE	FALSE	ebi-a-GCST90026372	20	62291767	0.004	383476	0.00660207	Mitochondrial DNA copy number || id:ebi-a-GCST90026372	FALSE	rs143190905	rs143190905	NA	NA	NA	NA	Mitochondrial DNA copy number	Mitochondrial DNA copy number || ||	TRUE	igd	20	62291767	0.00369421	1.6e-85	472174	ieu-b-4879	telomere length || id:ieu-b-4879	TRUE	reported	igd	2	TRUE
37	rs144204502	T	C	T	C	-0.100574	-0.0276	0.012562	NA	FALSE	FALSE	FALSE	ebi-a-GCST90026372	17	76183233	0.0096	383476	0.00396397	Mitochondrial DNA copy number || id:ebi-a-GCST90026372	FALSE	rs144204502	rs144204502	NA	NA	NA	NA	Mitochondrial DNA copy number	Mitochondrial DNA copy number || ||	TRUE	igd	17	76183233	0.00913369	3.4e-28	472174	ieu-b-4879	telomere length || id:ieu-b-4879	TRUE	reported	igd	2	TRUE
38	rs150150565	T	C	T	C	0.063762	0.0145	0.021455	NA	FALSE	FALSE	FALSE	ebi-a-GCST90026372	18	708207	0.0077	383476	0.0578296	Mitochondrial DNA copy number || id:ebi-a-GCST90026372	FALSE	rs150150565	rs150150565	NA	NA	NA	NA	Mitochondrial DNA copy number	Mitochondrial DNA copy number || ||	TRUE	igd	18	708207	0.00739877	6.8e-18	472174	ieu-b-4879	telomere length || id:ieu-b-4879	TRUE	reported	igd	2	TRUE
39	rs17445108	A	G	A	G	-0.0168922	0.0067	0.12695	NA	FALSE	FALSE	FALSE	ebi-a-GCST90026372	12	57082058	0.0031	383476	0.0315101	Mitochondrial DNA copy number || id:ebi-a-GCST90026372	FALSE	rs17445108	rs17445108	NA	NA	NA	NA	Mitochondrial DNA copy number	Mitochondrial DNA copy number || ||	TRUE	igd	12	57082058	0.00300983	2e-08	472174	ieu-b-4879	telomere length || id:ieu-b-4879	TRUE	reported	igd	2	TRUE
40	rs17803849	T	C	T	C	0.0273203	0.0041	0.405161	NA	FALSE	FALSE	FALSE	ebi-a-GCST90026372	2	210673445	0.0022	383476	0.0541602	Mitochondrial DNA copy number || id:ebi-a-GCST90026372	FALSE	rs17803849	rs17803849	NA	NA	NA	NA	Mitochondrial DNA copy number	Mitochondrial DNA copy number || ||	TRUE	igd	2	210673445	0.00203482	4.2e-41	472174	ieu-b-4879	telomere length || id:ieu-b-4879	TRUE	reported	igd	2	TRUE
41	rs182059586	C	T	C	T	-0.0571159	-0.0095	0.02511	NA	FALSE	FALSE	FALSE	ebi-a-GCST90026372	16	14652220	0.007	383476	0.1784	Mitochondrial DNA copy number || id:ebi-a-GCST90026372	FALSE	rs182059586	rs182059586	NA	NA	NA	NA	Mitochondrial DNA copy number	Mitochondrial DNA copy number || ||	TRUE	igd	16	14652220	0.00680853	4.9e-17	472174	ieu-b-4879	telomere length || id:ieu-b-4879	TRUE	reported	igd	2	TRUE
42	rs185174247	A	G	A	G	0.0372806	0.0044	0.05609	NA	FALSE	FALSE	FALSE	ebi-a-GCST90026372	5	138914024	0.0047	383476	0.3511	Mitochondrial DNA copy number || id:ebi-a-GCST90026372	FALSE	rs185174247	rs185174247	NA	NA	NA	NA	Mitochondrial DNA copy number	Mitochondrial DNA copy number || ||	TRUE	igd	5	138914024	0.00435145	1.1e-17	472174	ieu-b-4879	telomere length || id:ieu-b-4879	TRUE	reported	igd	2	TRUE
43	rs188918174	T	C	T	C	0.0403062	0.0081	0.036106	NA	FALSE	FALSE	FALSE	ebi-a-GCST90026372	2	54473646	0.0056	383476	0.1494	Mitochondrial DNA copy number || id:ebi-a-GCST90026372	FALSE	rs188918174	rs188918174	NA	NA	NA	NA	Mitochondrial DNA copy number	Mitochondrial DNA copy number || ||	TRUE	igd	2	54473646	0.00543604	1.2e-13	472174	ieu-b-4879	telomere length || id:ieu-b-4879	TRUE	reported	igd	2	TRUE
44	rs1907702	A	G	A	G	0.0150247	-0.0014	0.766771	NA	FALSE	FALSE	FALSE	ebi-a-GCST90026372	12	88955469	0.0026	383476	0.5876	Mitochondrial DNA copy number || id:ebi-a-GCST90026372	FALSE	rs1907702	rs1907702	NA	NA	NA	NA	Mitochondrial DNA copy number	Mitochondrial DNA copy number || ||	TRUE	igd	12	88955469	0.00242651	5.9e-10	472174	ieu-b-4879	telomere length || id:ieu-b-4879	TRUE	reported	igd	2	TRUE
45	rs1985369	G	A	G	A	-0.0311893	0.0019	0.868178	NA	FALSE	FALSE	FALSE	ebi-a-GCST90026372	7	159119220	0.0032	383476	0.5412	Mitochondrial DNA copy number || id:ebi-a-GCST90026372	FALSE	rs1985369	rs1985369	NA	NA	NA	NA	Mitochondrial DNA copy number	Mitochondrial DNA copy number || ||	TRUE	igd	7	159119220	0.00300952	3.6e-25	472174	ieu-b-4879	telomere length || id:ieu-b-4879	TRUE	reported	igd	2	TRUE
46	rs202034370	T	TA	T	TA	0.102784	-0.0051	0.97541	NA	FALSE	FALSE	FALSE	ebi-a-GCST90026372	2	54488018	0.0068	383476	0.4523	Mitochondrial DNA copy number || id:ebi-a-GCST90026372	FALSE	rs202034370	rs202034370	NA	NA	NA	NA	Mitochondrial DNA copy number	Mitochondrial DNA copy number || ||	TRUE	igd	2	54488018	0.00650108	2.6e-56	472174	ieu-b-4879	telomere length || id:ieu-b-4879	TRUE	reported	igd	2	TRUE
47	rs2056726	A	G	A	G	-0.0228078	0.0027	0.214376	NA	FALSE	FALSE	FALSE	ebi-a-GCST90026372	7	99780283	0.0026	383476	0.2916	Mitochondrial DNA copy number || id:ebi-a-GCST90026372	FALSE	rs2056726	rs2056726	NA	NA	NA	NA	Mitochondrial DNA copy number	Mitochondrial DNA copy number || ||	TRUE	igd	7	99780283	0.00243638	7.9e-21	472174	ieu-b-4879	telomere length || id:ieu-b-4879	TRUE	reported	igd	2	TRUE
48	rs2230590	C	T	C	T	-0.0158022	-0.0028	0.510897	NA	FALSE	FALSE	FALSE	ebi-a-GCST90026372	3	49936102	0.0021	383476	0.1791	Mitochondrial DNA copy number || id:ebi-a-GCST90026372	FALSE	rs2230590	rs2230590	NA	NA	NA	NA	Mitochondrial DNA copy number	Mitochondrial DNA copy number || ||	TRUE	igd	3	49936102	0.00200806	3.6e-15	472174	ieu-b-4879	telomere length || id:ieu-b-4879	TRUE	reported	igd	2	TRUE
49	rs2282764	G	A	G	A	-0.0224234	-0.0031	0.142384	NA	FALSE	FALSE	FALSE	ebi-a-GCST90026372	4	2255063	0.0031	383476	0.3186	Mitochondrial DNA copy number || id:ebi-a-GCST90026372	FALSE	rs2282764	rs2282764	NA	NA	NA	NA	Mitochondrial DNA copy number	Mitochondrial DNA copy number || ||	TRUE	igd	4	2255063	0.00289392	9.3e-15	472174	ieu-b-4879	telomere length || id:ieu-b-4879	TRUE	reported	igd	2	TRUE
50	rs2293579	A	G	A	G	-0.012915	-0.0026	0.386274	NA	FALSE	FALSE	FALSE	ebi-a-GCST90026372	11	47440758	0.0022	383476	0.2335	Mitochondrial DNA copy number || id:ebi-a-GCST90026372	FALSE	rs2293579	rs2293579	NA	NA	NA	NA	Mitochondrial DNA copy number	Mitochondrial DNA copy number || ||	TRUE	igd	11	47440758	0.00205481	3.3e-10	472174	ieu-b-4879	telomere length || id:ieu-b-4879	TRUE	reported	igd	2	TRUE
51	rs2555104	C	A	C	A	-0.0139717	-0.0033	0.434255	NA	FALSE	FALSE	FALSE	ebi-a-GCST90026372	2	17841243	0.0021	383476	0.1201	Mitochondrial DNA copy number || id:ebi-a-GCST90026372	FALSE	rs2555104	rs2555104	NA	NA	NA	NA	Mitochondrial DNA copy number	Mitochondrial DNA copy number || ||	TRUE	igd	2	17841243	0.00203498	6.6e-12	472174	ieu-b-4879	telomere length || id:ieu-b-4879	TRUE	reported	igd	2	TRUE
52	rs2763979	T	C	T	C	-0.0277713	0.0008	0.359721	NA	FALSE	FALSE	FALSE	ebi-a-GCST90026372	6	31794592	0.0022	383476	0.715201	Mitochondrial DNA copy number || id:ebi-a-GCST90026372	FALSE	rs2763979	rs2763979	NA	NA	NA	NA	Mitochondrial DNA copy number	Mitochondrial DNA copy number || ||	TRUE	igd	6	31794592	0.00208092	1.3e-40	472174	ieu-b-4879	telomere length || id:ieu-b-4879	TRUE	reported	igd	2	TRUE
53	rs28363070	A	G	A	G	0.0755557	-0.0182	0.013389	NA	FALSE	FALSE	FALSE	ebi-a-GCST90026372	5	1415068	0.0099	383476	0.0669098	Mitochondrial DNA copy number || id:ebi-a-GCST90026372	FALSE	rs28363070	rs28363070	NA	NA	NA	NA	Mitochondrial DNA copy number	Mitochondrial DNA copy number || ||	TRUE	igd	5	1415068	0.00959987	3.5e-15	472174	ieu-b-4879	telomere length || id:ieu-b-4879	TRUE	reported	igd	2	TRUE
54	rs28502153	A	C	A	C	-0.0215916	-0.0002	0.377958	NA	FALSE	FALSE	FALSE	ebi-a-GCST90026372	22	17469049	0.0022	383476	0.9316	Mitochondrial DNA copy number || id:ebi-a-GCST90026372	FALSE	rs28502153	rs28502153	NA	NA	NA	NA	Mitochondrial DNA copy number	Mitochondrial DNA copy number || ||	TRUE	igd	22	17469049	0.00206208	1.2e-25	472174	ieu-b-4879	telomere length || id:ieu-b-4879	TRUE	reported	igd	2	TRUE
55	rs2967355	C	A	C	A	-0.0461595	-0.0009	0.774276	NA	FALSE	FALSE	FALSE	ebi-a-GCST90026372	16	82200103	0.0025	383476	0.7213	Mitochondrial DNA copy number || id:ebi-a-GCST90026372	FALSE	rs2967355	rs2967355	NA	NA	NA	NA	Mitochondrial DNA copy number	Mitochondrial DNA copy number || ||	TRUE	igd	16	82200103	0.00238972	4e-83	472174	ieu-b-4879	telomere length || id:ieu-b-4879	TRUE	reported	igd	2	TRUE
56	rs3093888	A	G	A	G	-0.028973	-0.0009	0.05131	NA	FALSE	FALSE	FALSE	ebi-a-GCST90026372	14	20812951	0.0048	383476	0.8468	Mitochondrial DNA copy number || id:ebi-a-GCST90026372	FALSE	rs3093888	rs3093888	NA	NA	NA	NA	Mitochondrial DNA copy number	Mitochondrial DNA copy number || ||	TRUE	igd	14	20812951	0.00452459	1.5e-10	472174	ieu-b-4879	telomere length || id:ieu-b-4879	TRUE	reported	igd	2	TRUE
57	rs34550383	C	CT	C	CT	-0.0192236	-0.0039	0.5474	NA	FALSE	FALSE	FALSE	ebi-a-GCST90026372	14	91971787	0.0021	383476	0.0640398	Mitochondrial DNA copy number || id:ebi-a-GCST90026372	FALSE	rs34550383	rs34550383	NA	NA	NA	NA	Mitochondrial DNA copy number	Mitochondrial DNA copy number || ||	TRUE	igd	14	91971787	0.00200412	8.6e-22	472174	ieu-b-4879	telomere length || id:ieu-b-4879	TRUE	reported	igd	2	TRUE
58	rs35446936	A	G	A	G	-0.0940025	-0.0033	0.243674	NA	FALSE	FALSE	FALSE	ebi-a-GCST90026372	3	169486508	0.0025	383476	0.1832	Mitochondrial DNA copy number || id:ebi-a-GCST90026372	FALSE	rs35446936	rs35446936	NA	NA	NA	NA	Mitochondrial DNA copy number	Mitochondrial DNA copy number || ||	TRUE	igd	3	169486508	0.00232918	1e-200	472174	ieu-b-4879	telomere length || id:ieu-b-4879	TRUE	reported	igd	2	TRUE
59	rs35640778	A	G	A	G	-0.209011	-0.0099	0.020757	NA	FALSE	FALSE	FALSE	ebi-a-GCST90026372	20	62321128	0.0073	383476	0.1719	Mitochondrial DNA copy number || id:ebi-a-GCST90026372	FALSE	rs35640778	rs35640778	NA	NA	NA	NA	Mitochondrial DNA copy number	Mitochondrial DNA copy number || ||	TRUE	igd	20	62321128	0.00702087	9.59e-195	472174	ieu-b-4879	telomere length || id:ieu-b-4879	TRUE	reported	igd	2	TRUE
60	rs376641875	C	CATAA	C	CATAA	-0.0265863	0.0014	0.928873	NA	FALSE	FALSE	FALSE	ebi-a-GCST90026372	2	54622978	0.0044	383476	0.7568	Mitochondrial DNA copy number || id:ebi-a-GCST90026372	FALSE	rs376641875	rs376641875	NA	NA	NA	NA	Mitochondrial DNA copy number	Mitochondrial DNA copy number || ||	TRUE	igd	2	54622978	0.00422973	3.3e-10	472174	ieu-b-4879	telomere length || id:ieu-b-4879	TRUE	reported	igd	2	TRUE
61	rs3767952	A	G	A	G	0.0134472	-0.001	0.226709	NA	FALSE	FALSE	FALSE	ebi-a-GCST90026372	1	41231032	0.0025	383476	0.7003	Mitochondrial DNA copy number || id:ebi-a-GCST90026372	FALSE	rs3767952	rs3767952	NA	NA	NA	NA	Mitochondrial DNA copy number	Mitochondrial DNA copy number || ||	TRUE	igd	1	41231032	0.00238826	1.8e-08	472174	ieu-b-4879	telomere length || id:ieu-b-4879	TRUE	reported	igd	2	TRUE
62	rs3785074	G	A	G	A	0.023863	0.0012	0.289672	NA	FALSE	FALSE	FALSE	ebi-a-GCST90026372	16	69406986	0.0023	383476	0.5938	Mitochondrial DNA copy number || id:ebi-a-GCST90026372	FALSE	rs3785074	rs3785074	NA	NA	NA	NA	Mitochondrial DNA copy number	Mitochondrial DNA copy number || ||	TRUE	igd	16	69406986	0.00220455	2.6e-27	472174	ieu-b-4879	telomere length || id:ieu-b-4879	TRUE	reported	igd	2	TRUE
63	rs3891167	G	A	G	A	-0.0425685	-0.0028	0.253435	NA	FALSE	FALSE	FALSE	ebi-a-GCST90026372	18	658423	0.0025	383476	0.266	Mitochondrial DNA copy number || id:ebi-a-GCST90026372	FALSE	rs3891167	rs3891167	NA	NA	NA	NA	Mitochondrial DNA copy number	Mitochondrial DNA copy number || ||	TRUE	igd	18	658423	0.00239551	1.2e-70	472174	ieu-b-4879	telomere length || id:ieu-b-4879	TRUE	reported	igd	2	TRUE
64	rs429358	C	T	C	T	0.0173498	-0.0131	0.153969	NA	FALSE	FALSE	FALSE	ebi-a-GCST90026372	19	45411941	0.0029	383476	7.53e-06	Mitochondrial DNA copy number || id:ebi-a-GCST90026372	FALSE	rs429358	rs429358	NA	NA	NA	NA	Mitochondrial DNA copy number	Mitochondrial DNA copy number || ||	TRUE	igd	19	45411941	0.00277091	3.8e-10	472174	ieu-b-4879	telomere length || id:ieu-b-4879	TRUE	reported	igd	2	TRUE
65	rs4498805	T	G	T	G	0.0150601	0.0018	0.546632	NA	FALSE	FALSE	FALSE	ebi-a-GCST90026372	1	110910397	0.0021	383476	0.3978	Mitochondrial DNA copy number || id:ebi-a-GCST90026372	FALSE	rs4498805	rs4498805	NA	NA	NA	NA	Mitochondrial DNA copy number	Mitochondrial DNA copy number || ||	TRUE	igd	1	110910397	0.00200376	5.7e-14	472174	ieu-b-4879	telomere length || id:ieu-b-4879	TRUE	reported	igd	2	TRUE
66	rs450962	G	A	G	A	0.0142833	0.0051	0.283779	NA	FALSE	FALSE	FALSE	ebi-a-GCST90026372	16	28413517	0.0026	383476	0.0455795	Mitochondrial DNA copy number || id:ebi-a-GCST90026372	FALSE	rs450962	rs450962	NA	NA	NA	NA	Mitochondrial DNA copy number	Mitochondrial DNA copy number || ||	TRUE	igd	16	28413517	0.00245428	5.9e-09	472174	ieu-b-4879	telomere length || id:ieu-b-4879	TRUE	reported	igd	2	TRUE
67	rs4530278	T	G	T	G	0.0138793	0.0002	0.59815	NA	FALSE	FALSE	FALSE	ebi-a-GCST90026372	19	33752994	0.0022	383476	0.9398	Mitochondrial DNA copy number || id:ebi-a-GCST90026372	FALSE	rs4530278	rs4530278	NA	NA	NA	NA	Mitochondrial DNA copy number	Mitochondrial DNA copy number || ||	TRUE	igd	19	33752994	0.0020567	1.5e-11	472174	ieu-b-4879	telomere length || id:ieu-b-4879	TRUE	reported	igd	2	TRUE
68	rs45604339	T	C	T	C	-0.020433	0.0034	0.34242	NA	FALSE	FALSE	FALSE	ebi-a-GCST90026372	14	65543102	0.0022	383476	0.1192	Mitochondrial DNA copy number || id:ebi-a-GCST90026372	FALSE	rs45604339	rs45604339	NA	NA	NA	NA	Mitochondrial DNA copy number	Mitochondrial DNA copy number || ||	TRUE	igd	14	65543102	0.00211433	4.3e-22	472174	ieu-b-4879	telomere length || id:ieu-b-4879	TRUE	reported	igd	2	TRUE
69	rs4616688	T	G	T	G	-0.0173476	0.0027	0.525394	NA	FALSE	FALSE	FALSE	ebi-a-GCST90026372	3	160042459	0.0021	383476	0.2007	Mitochondrial DNA copy number || id:ebi-a-GCST90026372	FALSE	rs4616688	rs4616688	NA	NA	NA	NA	Mitochondrial DNA copy number	Mitochondrial DNA copy number || ||	TRUE	igd	3	160042459	0.00200198	4.5e-18	472174	ieu-b-4879	telomere length || id:ieu-b-4879	TRUE	reported	igd	2	TRUE
70	rs4695407	G	A	G	A	0.0141511	-0.0038	0.507843	NA	FALSE	FALSE	FALSE	ebi-a-GCST90026372	4	48843372	0.0021	383476	0.0681695	Mitochondrial DNA copy number || id:ebi-a-GCST90026372	FALSE	rs4695407	rs4695407	NA	NA	NA	NA	Mitochondrial DNA copy number	Mitochondrial DNA copy number || ||	TRUE	igd	4	48843372	0.00199925	1.5e-12	472174	ieu-b-4879	telomere length || id:ieu-b-4879	TRUE	reported	igd	2	TRUE
71	rs4724	A	G	A	G	-0.0547446	-0.0016	0.116598	NA	FALSE	FALSE	FALSE	ebi-a-GCST90026372	17	7760397	0.0034	383476	0.636	Mitochondrial DNA copy number || id:ebi-a-GCST90026372	FALSE	rs4724	rs4724	NA	NA	NA	NA	Mitochondrial DNA copy number	Mitochondrial DNA copy number || ||	TRUE	igd	17	7760397	0.00312441	9.8e-69	472174	ieu-b-4879	telomere length || id:ieu-b-4879	TRUE	reported	igd	2	TRUE
72	rs4743037	T	C	T	C	0.0147971	0.0015	0.230874	NA	FALSE	FALSE	FALSE	ebi-a-GCST90026372	9	109639970	0.0025	383476	0.553	Mitochondrial DNA copy number || id:ebi-a-GCST90026372	FALSE	rs4743037	rs4743037	NA	NA	NA	NA	Mitochondrial DNA copy number	Mitochondrial DNA copy number || ||	TRUE	igd	9	109639970	0.00238094	5.1e-10	472174	ieu-b-4879	telomere length || id:ieu-b-4879	TRUE	reported	igd	2	TRUE
73	rs55747751	A	G	A	G	-0.0211612	0.0023	0.077375	NA	FALSE	FALSE	FALSE	ebi-a-GCST90026372	5	132397351	0.0039	383476	0.5454	Mitochondrial DNA copy number || id:ebi-a-GCST90026372	FALSE	rs55747751	rs55747751	NA	NA	NA	NA	Mitochondrial DNA copy number	Mitochondrial DNA copy number || ||	TRUE	igd	5	132397351	0.00375164	1.7e-08	472174	ieu-b-4879	telomere length || id:ieu-b-4879	TRUE	reported	igd	2	TRUE
74	rs56061761	A	G	A	G	-0.0203556	-0.0023	0.332642	NA	FALSE	FALSE	FALSE	ebi-a-GCST90026372	16	70187811	0.0023	383476	0.3197	Mitochondrial DNA copy number || id:ebi-a-GCST90026372	FALSE	rs56061761	rs56061761	NA	NA	NA	NA	Mitochondrial DNA copy number	Mitochondrial DNA copy number || ||	TRUE	igd	16	70187811	0.0022296	6.9e-20	472174	ieu-b-4879	telomere length || id:ieu-b-4879	TRUE	reported	igd	2	TRUE
75	rs56799554	G	A	G	A	-0.0259793	-0.0041	0.170183	NA	FALSE	FALSE	FALSE	ebi-a-GCST90026372	17	41456413	0.0028	383476	0.1449	Mitochondrial DNA copy number || id:ebi-a-GCST90026372	FALSE	rs56799554	rs56799554	NA	NA	NA	NA	Mitochondrial DNA copy number	Mitochondrial DNA copy number || ||	TRUE	igd	17	41456413	0.00267858	3e-22	472174	ieu-b-4879	telomere length || id:ieu-b-4879	TRUE	reported	igd	2	TRUE
76	rs5742915	C	T	C	T	0.0193377	0.0023	0.445829	NA	FALSE	FALSE	FALSE	ebi-a-GCST90026372	15	74336633	0.0021	383476	0.2781	Mitochondrial DNA copy number || id:ebi-a-GCST90026372	FALSE	rs5742915	rs5742915	NA	NA	NA	NA	Mitochondrial DNA copy number	Mitochondrial DNA copy number || ||	TRUE	igd	15	74336633	0.00202886	1.6e-21	472174	ieu-b-4879	telomere length || id:ieu-b-4879	TRUE	reported	igd	2	TRUE
77	rs59409453	G	A	G	A	0.0202133	0.0053	0.730602	NA	FALSE	FALSE	FALSE	ebi-a-GCST90026372	17	1666218	0.0024	383476	0.0284997	Mitochondrial DNA copy number || id:ebi-a-GCST90026372	FALSE	rs59409453	rs59409453	NA	NA	NA	NA	Mitochondrial DNA copy number	Mitochondrial DNA copy number || ||	TRUE	igd	17	1666218	0.00230175	1.6e-18	472174	ieu-b-4879	telomere length || id:ieu-b-4879	TRUE	reported	igd	2	TRUE
78	rs6007020	C	T	C	T	0.0144904	0.0021	0.367823	NA	FALSE	FALSE	FALSE	ebi-a-GCST90026372	22	45790132	0.0022	383476	0.3399	Mitochondrial DNA copy number || id:ebi-a-GCST90026372	FALSE	rs6007020	rs6007020	NA	NA	NA	NA	Mitochondrial DNA copy number	Mitochondrial DNA copy number || ||	TRUE	igd	22	45790132	0.00209637	4.8e-12	472174	ieu-b-4879	telomere length || id:ieu-b-4879	TRUE	reported	igd	2	TRUE
79	rs61405042	T	C	T	C	-0.0501874	0.0032	0.029288	NA	FALSE	FALSE	FALSE	ebi-a-GCST90026372	7	67200	0.0245	383476	0.8948	Mitochondrial DNA copy number || id:ebi-a-GCST90026372	FALSE	rs61405042	rs61405042	NA	NA	NA	NA	Mitochondrial DNA copy number	Mitochondrial DNA copy number || ||	TRUE	igd	7	67200	0.00602955	8.5e-17	472174	ieu-b-4879	telomere length || id:ieu-b-4879	TRUE	reported	igd	2	TRUE
80	rs61748181	T	C	T	C	-0.059181	0.0046	0.028928	NA	FALSE	FALSE	FALSE	ebi-a-GCST90026372	5	1294166	0.0062	383476	0.4568	Mitochondrial DNA copy number || id:ebi-a-GCST90026372	FALSE	rs61748181	rs61748181	NA	NA	NA	NA	Mitochondrial DNA copy number	Mitochondrial DNA copy number || ||	TRUE	igd	5	1294166	0.00595394	2.8e-23	472174	ieu-b-4879	telomere length || id:ieu-b-4879	TRUE	reported	igd	2	TRUE
81	rs6536702	A	G	A	G	0.0534148	-0.0004	0.774647	NA	FALSE	FALSE	FALSE	ebi-a-GCST90026372	4	164028105	0.0025	383476	0.8748	Mitochondrial DNA copy number || id:ebi-a-GCST90026372	FALSE	rs6536702	rs6536702	NA	NA	NA	NA	Mitochondrial DNA copy number	Mitochondrial DNA copy number || ||	TRUE	igd	4	164028105	0.00238875	9.4e-111	472174	ieu-b-4879	telomere length || id:ieu-b-4879	TRUE	reported	igd	2	TRUE
82	rs6584579	G	A	G	A	0.0114923	-0.0011	0.398876	NA	FALSE	FALSE	FALSE	ebi-a-GCST90026372	10	105657892	0.0022	383476	0.599	Mitochondrial DNA copy number || id:ebi-a-GCST90026372	TRUE	rs6584579	rs2984132	G	A	C	T	Mitochondrial DNA copy number	Mitochondrial DNA copy number || ||	TRUE	igd	10	105645725	0.00204674	2e-08	472174	ieu-b-4879	telomere length || id:ieu-b-4879	TRUE	reported	igd	2	TRUE
83	rs6587577	G	A	G	A	-0.0182148	-0.0013	0.826346	NA	FALSE	FALSE	FALSE	ebi-a-GCST90026372	1	151402045	0.0028	383476	0.6474	Mitochondrial DNA copy number || id:ebi-a-GCST90026372	FALSE	rs6587577	rs6587577	NA	NA	NA	NA	Mitochondrial DNA copy number	Mitochondrial DNA copy number || ||	TRUE	igd	1	151402045	0.0026359	4.8e-12	472174	ieu-b-4879	telomere length || id:ieu-b-4879	TRUE	reported	igd	2	TRUE
84	rs6590343	G	A	G	A	0.0121739	0.0055	0.516385	NA	FALSE	FALSE	FALSE	ebi-a-GCST90026372	11	128500215	0.0021	383476	0.00967698	Mitochondrial DNA copy number || id:ebi-a-GCST90026372	FALSE	rs6590343	rs6590343	NA	NA	NA	NA	Mitochondrial DNA copy number	Mitochondrial DNA copy number || ||	TRUE	igd	11	128500215	0.00201444	1.5e-09	472174	ieu-b-4879	telomere length || id:ieu-b-4879	TRUE	reported	igd	2	TRUE
85	rs6659669	T	C	T	C	-0.0117091	-0.0011	0.605095	NA	FALSE	FALSE	FALSE	ebi-a-GCST90026372	1	185315067	0.0022	383476	0.6186	Mitochondrial DNA copy number || id:ebi-a-GCST90026372	FALSE	rs6659669	rs6659669	NA	NA	NA	NA	Mitochondrial DNA copy number	Mitochondrial DNA copy number || ||	TRUE	igd	1	185315067	0.00205167	1.1e-08	472174	ieu-b-4879	telomere length || id:ieu-b-4879	TRUE	reported	igd	2	TRUE
86	rs66731853	A	G	A	G	-0.0177791	0.0027	0.317304	NA	FALSE	FALSE	FALSE	ebi-a-GCST90026372	1	20916238	0.0023	383476	0.2255	Mitochondrial DNA copy number || id:ebi-a-GCST90026372	FALSE	rs66731853	rs66731853	NA	NA	NA	NA	Mitochondrial DNA copy number	Mitochondrial DNA copy number || ||	TRUE	igd	1	20916238	0.00215421	1.5e-16	472174	ieu-b-4879	telomere length || id:ieu-b-4879	TRUE	reported	igd	2	TRUE
87	rs6751209	C	T	C	T	-0.0140465	-0.0029	0.204231	NA	FALSE	FALSE	FALSE	ebi-a-GCST90026372	2	43588302	0.0026	383476	0.2659	Mitochondrial DNA copy number || id:ebi-a-GCST90026372	FALSE	rs6751209	rs6751209	NA	NA	NA	NA	Mitochondrial DNA copy number	Mitochondrial DNA copy number || ||	TRUE	igd	2	43588302	0.00248465	1.6e-08	472174	ieu-b-4879	telomere length || id:ieu-b-4879	TRUE	reported	igd	2	TRUE
88	rs6776756	A	G	A	G	-0.0174439	-0.0015	0.597562	NA	FALSE	FALSE	FALSE	ebi-a-GCST90026372	3	128215821	0.0021	383476	0.4955	Mitochondrial DNA copy number || id:ebi-a-GCST90026372	FALSE	rs6776756	rs6776756	NA	NA	NA	NA	Mitochondrial DNA copy number	Mitochondrial DNA copy number || ||	TRUE	igd	3	128215821	0.00203747	1.1e-17	472174	ieu-b-4879	telomere length || id:ieu-b-4879	TRUE	reported	igd	2	TRUE
89	rs6790988	G	A	G	A	0.0145728	0.0022	0.741902	NA	FALSE	FALSE	FALSE	ebi-a-GCST90026372	3	170263320	0.0024	383476	0.3546	Mitochondrial DNA copy number || id:ebi-a-GCST90026372	FALSE	rs6790988	rs6790988	NA	NA	NA	NA	Mitochondrial DNA copy number	Mitochondrial DNA copy number || ||	TRUE	igd	3	170263320	0.00228428	1.8e-10	472174	ieu-b-4879	telomere length || id:ieu-b-4879	TRUE	reported	igd	2	TRUE
90	rs6881568	A	C	A	C	0.0169256	0.0021	0.36258	NA	FALSE	FALSE	FALSE	ebi-a-GCST90026372	5	1670265	0.0022	383476	0.3373	Mitochondrial DNA copy number || id:ebi-a-GCST90026372	FALSE	rs6881568	rs6881568	NA	NA	NA	NA	Mitochondrial DNA copy number	Mitochondrial DNA copy number || ||	TRUE	igd	5	1670265	0.00207735	3.7e-16	472174	ieu-b-4879	telomere length || id:ieu-b-4879	TRUE	reported	igd	2	TRUE
91	rs7099229	A	G	A	G	-0.0153288	-0.0019	0.273301	NA	FALSE	FALSE	FALSE	ebi-a-GCST90026372	10	96134685	0.0024	383476	0.4152	Mitochondrial DNA copy number || id:ebi-a-GCST90026372	FALSE	rs7099229	rs7099229	NA	NA	NA	NA	Mitochondrial DNA copy number	Mitochondrial DNA copy number || ||	TRUE	igd	10	96134685	0.00224403	8.4e-12	472174	ieu-b-4879	telomere length || id:ieu-b-4879	TRUE	reported	igd	2	TRUE
92	rs7164950	G	A	G	A	0.0129362	-0.0018	0.405979	NA	FALSE	FALSE	FALSE	ebi-a-GCST90026372	15	56775385	0.0021	383476	0.4055	Mitochondrial DNA copy number || id:ebi-a-GCST90026372	FALSE	rs7164950	rs7164950	NA	NA	NA	NA	Mitochondrial DNA copy number	Mitochondrial DNA copy number || ||	TRUE	igd	15	56775385	0.00204001	2.3e-10	472174	ieu-b-4879	telomere length || id:ieu-b-4879	TRUE	reported	igd	2	TRUE
93	rs7209057	A	G	A	G	0.011819	0.0047	0.561044	NA	FALSE	FALSE	FALSE	ebi-a-GCST90026372	17	65705530	0.0021	383476	0.0283798	Mitochondrial DNA copy number || id:ebi-a-GCST90026372	FALSE	rs7209057	rs7209057	NA	NA	NA	NA	Mitochondrial DNA copy number	Mitochondrial DNA copy number || ||	TRUE	igd	17	65705530	0.00202865	5.7e-09	472174	ieu-b-4879	telomere length || id:ieu-b-4879	TRUE	reported	igd	2	TRUE
94	rs7221585	T	C	T	C	0.0143271	0.001	0.22401	NA	FALSE	FALSE	FALSE	ebi-a-GCST90026372	17	76195153	0.0026	383476	0.7105	Mitochondrial DNA copy number || id:ebi-a-GCST90026372	FALSE	rs7221585	rs7221585	NA	NA	NA	NA	Mitochondrial DNA copy number	Mitochondrial DNA copy number || ||	TRUE	igd	17	76195153	0.00247042	6.7e-09	472174	ieu-b-4879	telomere length || id:ieu-b-4879	TRUE	reported	igd	2	TRUE
95	rs73581419	T	C	T	C	0.0229838	0.0041	0.106605	NA	FALSE	FALSE	FALSE	ebi-a-GCST90026372	14	21941148	0.0034	383476	0.2268	Mitochondrial DNA copy number || id:ebi-a-GCST90026372	FALSE	rs73581419	rs73581419	NA	NA	NA	NA	Mitochondrial DNA copy number	Mitochondrial DNA copy number || ||	TRUE	igd	14	21941148	0.00324156	1.3e-12	472174	ieu-b-4879	telomere length || id:ieu-b-4879	TRUE	reported	igd	2	TRUE
96	rs73730598	A	G	A	G	0.0273632	-0.0008	0.054793	NA	FALSE	FALSE	FALSE	ebi-a-GCST90026372	5	77973	0.0046	383476	0.8614	Mitochondrial DNA copy number || id:ebi-a-GCST90026372	FALSE	rs73730598	rs73730598	NA	NA	NA	NA	Mitochondrial DNA copy number	Mitochondrial DNA copy number || ||	TRUE	igd	5	77973	0.00439272	4.7e-10	472174	ieu-b-4879	telomere length || id:ieu-b-4879	TRUE	reported	igd	2	TRUE
97	rs76065543	T	C	T	C	0.0342843	0.0032	0.137527	NA	FALSE	FALSE	FALSE	ebi-a-GCST90026372	16	74678063	0.003	383476	0.2934	Mitochondrial DNA copy number || id:ebi-a-GCST90026372	FALSE	rs76065543	rs76065543	NA	NA	NA	NA	Mitochondrial DNA copy number	Mitochondrial DNA copy number || ||	TRUE	igd	16	74678063	0.00290708	4.2e-32	472174	ieu-b-4879	telomere length || id:ieu-b-4879	TRUE	reported	igd	2	TRUE
98	rs76219171	A	G	A	G	0.0359839	0.0025	0.058433	NA	FALSE	FALSE	FALSE	ebi-a-GCST90026372	16	50188929	0.0045	383476	0.574101	Mitochondrial DNA copy number || id:ebi-a-GCST90026372	FALSE	rs76219171	rs76219171	NA	NA	NA	NA	Mitochondrial DNA copy number	Mitochondrial DNA copy number || ||	TRUE	igd	16	50188929	0.00431741	7.8e-17	472174	ieu-b-4879	telomere length || id:ieu-b-4879	TRUE	reported	igd	2	TRUE
99	rs76666449	C	T	C	T	0.0295125	-0.0034	0.100625	NA	FALSE	FALSE	FALSE	ebi-a-GCST90026372	12	120904895	0.0035	383476	0.3261	Mitochondrial DNA copy number || id:ebi-a-GCST90026372	FALSE	rs76666449	rs76666449	NA	NA	NA	NA	Mitochondrial DNA copy number	Mitochondrial DNA copy number || ||	TRUE	igd	12	120904895	0.00333186	8.2e-19	472174	ieu-b-4879	telomere length || id:ieu-b-4879	TRUE	reported	igd	2	TRUE
100	rs7772289	T	G	T	G	0.017549	0.0041	0.503081	NA	FALSE	FALSE	FALSE	ebi-a-GCST90026372	6	28674322	0.0021	383476	0.0538406	Mitochondrial DNA copy number || id:ebi-a-GCST90026372	FALSE	rs7772289	rs7772289	NA	NA	NA	NA	Mitochondrial DNA copy number	Mitochondrial DNA copy number || ||	TRUE	igd	6	28674322	0.00200003	1.7e-18	472174	ieu-b-4879	telomere length || id:ieu-b-4879	TRUE	reported	igd	2	TRUE
101	rs77732866	A	G	A	G	0.0177942	0.0005	0.137597	NA	FALSE	FALSE	FALSE	ebi-a-GCST90026372	2	58979879	0.0031	383476	0.8708	Mitochondrial DNA copy number || id:ebi-a-GCST90026372	FALSE	rs77732866	rs77732866	NA	NA	NA	NA	Mitochondrial DNA copy number	Mitochondrial DNA copy number || ||	TRUE	igd	2	58979879	0.00290595	9.2e-10	472174	ieu-b-4879	telomere length || id:ieu-b-4879	TRUE	reported	igd	2	TRUE
102	rs78491606	C	A	C	A	-0.0756311	0.0047	0.018433	NA	FALSE	FALSE	FALSE	ebi-a-GCST90026372	3	72891547	0.0076	383476	0.5369	Mitochondrial DNA copy number || id:ebi-a-GCST90026372	FALSE	rs78491606	rs78491606	NA	NA	NA	NA	Mitochondrial DNA copy number	Mitochondrial DNA copy number || ||	TRUE	igd	3	72891547	0.00741168	1.9e-24	472174	ieu-b-4879	telomere length || id:ieu-b-4879	TRUE	reported	igd	2	TRUE
103	rs79977579	A	C	A	C	0.0281517	-0.0096	0.09555	NA	FALSE	FALSE	FALSE	ebi-a-GCST90026372	12	54694560	0.0035	383476	0.00666392	Mitochondrial DNA copy number || id:ebi-a-GCST90026372	FALSE	rs79977579	rs79977579	NA	NA	NA	NA	Mitochondrial DNA copy number	Mitochondrial DNA copy number || ||	TRUE	igd	12	54694560	0.00343182	2.3e-16	472174	ieu-b-4879	telomere length || id:ieu-b-4879	TRUE	reported	igd	2	TRUE
104	rs80116508	A	G	A	G	-0.0352672	0.001	0.062356	NA	FALSE	FALSE	FALSE	ebi-a-GCST90026372	16	3650970	0.0044	383476	0.8254	Mitochondrial DNA copy number || id:ebi-a-GCST90026372	FALSE	rs80116508	rs80116508	NA	NA	NA	NA	Mitochondrial DNA copy number	Mitochondrial DNA copy number || ||	TRUE	igd	16	3650970	0.00415151	2e-17	472174	ieu-b-4879	telomere length || id:ieu-b-4879	TRUE	reported	igd	2	TRUE
105	rs80324517	A	G	A	G	0.0396515	-0.0005	0.048259	NA	FALSE	FALSE	FALSE	ebi-a-GCST90026372	6	204031	0.0049	383476	0.9177	Mitochondrial DNA copy number || id:ebi-a-GCST90026372	FALSE	rs80324517	rs80324517	NA	NA	NA	NA	Mitochondrial DNA copy number	Mitochondrial DNA copy number || ||	TRUE	igd	6	204031	0.00466286	1.8e-17	472174	ieu-b-4879	telomere length || id:ieu-b-4879	TRUE	reported	igd	2	TRUE
106	rs8102497	A	G	A	G	-0.0149654	0.0016	0.431828	NA	FALSE	FALSE	FALSE	ebi-a-GCST90026372	19	57370055	0.0022	383476	0.4667	Mitochondrial DNA copy number || id:ebi-a-GCST90026372	FALSE	rs8102497	rs8102497	NA	NA	NA	NA	Mitochondrial DNA copy number	Mitochondrial DNA copy number || ||	TRUE	igd	19	57370055	0.0020233	1.4e-13	472174	ieu-b-4879	telomere length || id:ieu-b-4879	TRUE	reported	igd	2	TRUE
107	rs8105767	G	A	G	A	0.0328384	0.0058	0.29467	NA	FALSE	FALSE	FALSE	ebi-a-GCST90026372	19	22215441	0.0023	383476	0.01323	Mitochondrial DNA copy number || id:ebi-a-GCST90026372	FALSE	rs8105767	rs8105767	NA	NA	NA	NA	Mitochondrial DNA copy number	Mitochondrial DNA copy number || ||	TRUE	igd	19	22215441	0.00220117	2.5e-50	472174	ieu-b-4879	telomere length || id:ieu-b-4879	TRUE	reported	igd	2	TRUE
108	rs869785	C	T	C	T	-0.0147303	-0.0035	0.672471	NA	FALSE	FALSE	FALSE	ebi-a-GCST90026372	3	24347800	0.0022	383476	0.1206	Mitochondrial DNA copy number || id:ebi-a-GCST90026372	FALSE	rs869785	rs869785	NA	NA	NA	NA	Mitochondrial DNA copy number	Mitochondrial DNA copy number || ||	TRUE	igd	3	24347800	0.00212801	4.4e-12	472174	ieu-b-4879	telomere length || id:ieu-b-4879	TRUE	reported	igd	2	TRUE
109	rs871134	T	C	T	C	-0.0182986	0.0052	0.569032	NA	FALSE	FALSE	FALSE	ebi-a-GCST90026372	4	7044380	0.0021	383476	0.0151098	Mitochondrial DNA copy number || id:ebi-a-GCST90026372	FALSE	rs871134	rs871134	NA	NA	NA	NA	Mitochondrial DNA copy number	Mitochondrial DNA copy number || ||	TRUE	igd	4	7044380	0.0020263	1.7e-19	472174	ieu-b-4879	telomere length || id:ieu-b-4879	TRUE	reported	igd	2	TRUE
110	rs932002	T	C	T	C	-0.0402052	0.0018	0.150843	NA	FALSE	FALSE	FALSE	ebi-a-GCST90026372	1	226577306	0.0029	383476	0.54	Mitochondrial DNA copy number || id:ebi-a-GCST90026372	FALSE	rs932002	rs932002	NA	NA	NA	NA	Mitochondrial DNA copy number	Mitochondrial DNA copy number || ||	TRUE	igd	1	226577306	0.00279667	7.3e-47	472174	ieu-b-4879	telomere length || id:ieu-b-4879	TRUE	reported	igd	2	TRUE
111	rs939916	A	G	A	G	0.0241795	0.003	0.669967	NA	FALSE	FALSE	FALSE	ebi-a-GCST90026372	11	202253	0.0023	383476	0.1919	Mitochondrial DNA copy number || id:ebi-a-GCST90026372	FALSE	rs939916	rs939916	NA	NA	NA	NA	Mitochondrial DNA copy number	Mitochondrial DNA copy number || ||	TRUE	igd	11	202253	0.00216724	6.6e-29	472174	ieu-b-4879	telomere length || id:ieu-b-4879	TRUE	reported	igd	2	TRUE
112	rs9419958	C	T	C	T	-0.0810098	-0.0149	0.86139	NA	FALSE	FALSE	FALSE	ebi-a-GCST90026372	10	105675946	0.0031	383476	1.93e-06	Mitochondrial DNA copy number || id:ebi-a-GCST90026372	FALSE	rs9419958	rs9419958	NA	NA	NA	NA	Mitochondrial DNA copy number	Mitochondrial DNA copy number || ||	TRUE	igd	10	105675946	0.00293847	2.6e-167	472174	ieu-b-4879	telomere length || id:ieu-b-4879	TRUE	reported	igd	2	TRUE
113	rs9600019	T	C	T	C	0.0127134	0.003	0.335579	NA	FALSE	FALSE	FALSE	ebi-a-GCST90026372	13	73317585	0.0022	383476	0.1818	Mitochondrial DNA copy number || id:ebi-a-GCST90026372	FALSE	rs9600019	rs9600019	NA	NA	NA	NA	Mitochondrial DNA copy number	Mitochondrial DNA copy number || ||	TRUE	igd	13	73317585	0.00213096	2.4e-09	472174	ieu-b-4879	telomere length || id:ieu-b-4879	TRUE	reported	igd	2	TRUE
114	rs9878436	T	C	T	C	-0.0143407	-0.0018	0.434393	NA	FALSE	FALSE	FALSE	ebi-a-GCST90026372	3	138244400	0.0021	383476	0.3921	Mitochondrial DNA copy number || id:ebi-a-GCST90026372	FALSE	rs9878436	rs9878436	NA	NA	NA	NA	Mitochondrial DNA copy number	Mitochondrial DNA copy number || ||	TRUE	igd	3	138244400	0.00201819	1.2e-12	472174	ieu-b-4879	telomere length || id:ieu-b-4879	TRUE	reported	igd	2	TRUE
115	rs9955360	A	C	A	C	-0.0190311	0.0053	0.869288	NA	FALSE	FALSE	FALSE	ebi-a-GCST90026372	18	78008334	0.0032	383476	0.0986211	Mitochondrial DNA copy number || id:ebi-a-GCST90026372	FALSE	rs9955360	rs9955360	NA	NA	NA	NA	Mitochondrial DNA copy number	Mitochondrial DNA copy number || ||	TRUE	igd	18	78008334	0.00299791	2.2e-10	472174	ieu-b-4879	telomere length || id:ieu-b-4879	TRUE	reported	igd	2	TRUE
116	rs10768683	G	C	G	C	0.0469922	-0.0003	0.841033	NA	FALSE	TRUE	TRUE	ebi-a-GCST90026372	11	5247791	0.003	383476	0.9326	Mitochondrial DNA copy number || id:ebi-a-GCST90026372	FALSE	rs10768683	rs10768683	NA	NA	NA	NA	Mitochondrial DNA copy number	Mitochondrial DNA copy number || ||	TRUE	igd	11	5247791	0.00277015	1.5e-64	472174	ieu-b-4879	telomere length || id:ieu-b-4879	TRUE	reported	igd	2	FALSE
117	rs10840270	G	C	G	C	0.014383	0.0003	0.655684	NA	FALSE	TRUE	TRUE	ebi-a-GCST90026372	11	9629553	0.0022	383476	0.8977	Mitochondrial DNA copy number || id:ebi-a-GCST90026372	FALSE	rs10840270	rs10840270	NA	NA	NA	NA	Mitochondrial DNA copy number	Mitochondrial DNA copy number || ||	TRUE	igd	11	9629553	0.00212494	1.3e-11	472174	ieu-b-4879	telomere length || id:ieu-b-4879	TRUE	reported	igd	2	FALSE
118	rs111950327	C	G	C	G	0.0238271	0.0019	0.063628	NA	FALSE	TRUE	TRUE	ebi-a-GCST90026372	16	48283993	0.0043	383476	0.653501	Mitochondrial DNA copy number || id:ebi-a-GCST90026372	FALSE	rs111950327	rs111950327	NA	NA	NA	NA	Mitochondrial DNA copy number	Mitochondrial DNA copy number || ||	TRUE	igd	16	48283993	0.00409406	5.9e-09	472174	ieu-b-4879	telomere length || id:ieu-b-4879	TRUE	reported	igd	2	FALSE
119	rs11769630	A	T	A	T	-0.0256807	0.0052	0.072227	NA	FALSE	TRUE	TRUE	ebi-a-GCST90026372	7	50257703	0.004	383476	0.1972	Mitochondrial DNA copy number || id:ebi-a-GCST90026372	FALSE	rs11769630	rs11769630	NA	NA	NA	NA	Mitochondrial DNA copy number	Mitochondrial DNA copy number || ||	TRUE	igd	7	50257703	0.00389475	4.3e-11	472174	ieu-b-4879	telomere length || id:ieu-b-4879	TRUE	reported	igd	2	FALSE
120	rs145114957	G	C	G	C	0.0272605	0.0009	0.042648	NA	FALSE	TRUE	TRUE	ebi-a-GCST90026372	1	94322469	0.0055	383476	0.8683	Mitochondrial DNA copy number || id:ebi-a-GCST90026372	FALSE	rs145114957	rs145114957	NA	NA	NA	NA	Mitochondrial DNA copy number	Mitochondrial DNA copy number || ||	TRUE	igd	1	94322469	0.00498872	4.6e-08	472174	ieu-b-4879	telomere length || id:ieu-b-4879	TRUE	reported	igd	2	FALSE
121	rs16978028	T	A	T	A	-0.029945	-0.0127	0.143727	NA	FALSE	TRUE	TRUE	ebi-a-GCST90026372	18	42070981	0.003	383476	2.72e-05	Mitochondrial DNA copy number || id:ebi-a-GCST90026372	FALSE	rs16978028	rs16978028	NA	NA	NA	NA	Mitochondrial DNA copy number	Mitochondrial DNA copy number || ||	TRUE	igd	18	42070981	0.00285068	8.2e-26	472174	ieu-b-4879	telomere length || id:ieu-b-4879	TRUE	reported	igd	2	FALSE
122	rs17677991	G	C	G	C	0.0222664	0.0042	0.342123	NA	FALSE	TRUE	TRUE	ebi-a-GCST90026372	15	42032383	0.0022	383476	0.0577497	Mitochondrial DNA copy number || id:ebi-a-GCST90026372	FALSE	rs17677991	rs17677991	NA	NA	NA	NA	Mitochondrial DNA copy number	Mitochondrial DNA copy number || ||	TRUE	igd	15	42032383	0.00210806	4.4e-26	472174	ieu-b-4879	telomere length || id:ieu-b-4879	TRUE	reported	igd	2	FALSE
123	rs1957937	T	A	T	A	0.0209365	-0.008	0.16018	NA	FALSE	TRUE	TRUE	ebi-a-GCST90026372	14	96181360	0.0029	383476	0.00608093	Mitochondrial DNA copy number || id:ebi-a-GCST90026372	FALSE	rs1957937	rs1957937	NA	NA	NA	NA	Mitochondrial DNA copy number	Mitochondrial DNA copy number || ||	TRUE	igd	14	96181360	0.00273361	1.9e-14	472174	ieu-b-4879	telomere length || id:ieu-b-4879	TRUE	reported	igd	2	FALSE
124	rs2276182	G	C	G	C	0.0233529	0.0029	0.403227	NA	FALSE	TRUE	TRUE	ebi-a-GCST90026372	18	51798047	0.0022	383476	0.1824	Mitochondrial DNA copy number || id:ebi-a-GCST90026372	FALSE	rs2276182	rs2276182	NA	NA	NA	NA	Mitochondrial DNA copy number	Mitochondrial DNA copy number || ||	TRUE	igd	18	51798047	0.00204247	2.8e-30	472174	ieu-b-4879	telomere length || id:ieu-b-4879	TRUE	reported	igd	2	FALSE
125	rs2306646	C	G	C	G	-0.0209417	-0.0038	0.559475	NA	FALSE	TRUE	TRUE	ebi-a-GCST90026372	8	21846586	0.0021	383476	0.0711295	Mitochondrial DNA copy number || id:ebi-a-GCST90026372	FALSE	rs2306646	rs2306646	NA	NA	NA	NA	Mitochondrial DNA copy number	Mitochondrial DNA copy number || ||	TRUE	igd	8	21846586	0.00201898	3.3e-25	472174	ieu-b-4879	telomere length || id:ieu-b-4879	TRUE	reported	igd	2	FALSE
126	rs28577594	C	G	C	G	0.0187657	-0.0002	0.709829	NA	FALSE	TRUE	TRUE	ebi-a-GCST90026372	12	123895906	0.0024	383476	0.9441	Mitochondrial DNA copy number || id:ebi-a-GCST90026372	FALSE	rs28577594	rs28577594	NA	NA	NA	NA	Mitochondrial DNA copy number	Mitochondrial DNA copy number || ||	TRUE	igd	12	123895906	0.00224024	5.4e-17	472174	ieu-b-4879	telomere length || id:ieu-b-4879	TRUE	reported	igd	2	FALSE
127	rs41269079	A	T	A	T	0.0153617	0.0021	0.188991	NA	FALSE	TRUE	TRUE	ebi-a-GCST90026372	1	45252015	0.0027	383476	0.4322	Mitochondrial DNA copy number || id:ebi-a-GCST90026372	FALSE	rs41269079	rs41269079	NA	NA	NA	NA	Mitochondrial DNA copy number	Mitochondrial DNA copy number || ||	TRUE	igd	1	45252015	0.0025499	1.7e-09	472174	ieu-b-4879	telomere length || id:ieu-b-4879	TRUE	reported	igd	2	FALSE
128	rs4731541	G	C	G	C	-0.0206119	-0.0026	0.624901	NA	FALSE	TRUE	TRUE	ebi-a-GCST90026372	7	128678236	0.0022	383476	0.2293	Mitochondrial DNA copy number || id:ebi-a-GCST90026372	FALSE	rs4731541	rs4731541	NA	NA	NA	NA	Mitochondrial DNA copy number	Mitochondrial DNA copy number || ||	TRUE	igd	7	128678236	0.00205962	1.4e-23	472174	ieu-b-4879	telomere length || id:ieu-b-4879	TRUE	reported	igd	2	FALSE
129	rs56178008	A	T	A	T	0.0143739	0.0071	0.437497	NA	FALSE	TRUE	TRUE	ebi-a-GCST90026372	2	29098543	0.0021	383476	0.000841608	Mitochondrial DNA copy number || id:ebi-a-GCST90026372	FALSE	rs56178008	rs56178008	NA	NA	NA	NA	Mitochondrial DNA copy number	Mitochondrial DNA copy number || ||	TRUE	igd	2	29098543	0.00201464	9.7e-13	472174	ieu-b-4879	telomere length || id:ieu-b-4879	TRUE	reported	igd	2	FALSE
130	rs611646	A	T	A	T	-0.0368309	0.0065	0.408685	NA	FALSE	TRUE	TRUE	ebi-a-GCST90026372	11	108177097	0.0021	383476	0.00234601	Mitochondrial DNA copy number || id:ebi-a-GCST90026372	FALSE	rs611646	rs611646	NA	NA	NA	NA	Mitochondrial DNA copy number	Mitochondrial DNA copy number || ||	TRUE	igd	11	108177097	0.00203547	3.5e-73	472174	ieu-b-4879	telomere length || id:ieu-b-4879	TRUE	reported	igd	2	FALSE
131	rs670180	A	T	A	T	-0.0115801	0.009	0.569104	NA	FALSE	TRUE	TRUE	ebi-a-GCST90026372	13	71236611	0.0021	383476	2.83e-05	Mitochondrial DNA copy number || id:ebi-a-GCST90026372	FALSE	rs670180	rs670180	NA	NA	NA	NA	Mitochondrial DNA copy number	Mitochondrial DNA copy number || ||	TRUE	igd	13	71236611	0.00203062	1.2e-08	472174	ieu-b-4879	telomere length || id:ieu-b-4879	TRUE	reported	igd	2	FALSE
132	rs75664430	G	C	G	C	-0.0235179	-0.0015	0.248028	NA	FALSE	TRUE	TRUE	ebi-a-GCST90026372	17	8064779	0.0024	383476	0.5416	Mitochondrial DNA copy number || id:ebi-a-GCST90026372	FALSE	rs75664430	rs75664430	NA	NA	NA	NA	Mitochondrial DNA copy number	Mitochondrial DNA copy number || ||	TRUE	igd	17	8064779	0.0023186	3.6e-24	472174	ieu-b-4879	telomere length || id:ieu-b-4879	TRUE	reported	igd	2	FALSE
133	rs762679	A	T	A	T	0.0310104	0.0026	0.856501	NA	FALSE	TRUE	TRUE	ebi-a-GCST90026372	8	48885436	0.003	383476	0.3789	Mitochondrial DNA copy number || id:ebi-a-GCST90026372	FALSE	rs762679	rs762679	NA	NA	NA	NA	Mitochondrial DNA copy number	Mitochondrial DNA copy number || ||	TRUE	igd	8	48885436	0.00285024	1.4e-27	472174	ieu-b-4879	telomere length || id:ieu-b-4879	TRUE	reported	igd	2	FALSE
134	rs77231040	C	G	C	G	0.0989303	0.0277	0.005742	NA	FALSE	TRUE	TRUE	ebi-a-GCST90026372	10	106280527	0.0143	383476	0.0533003	Mitochondrial DNA copy number || id:ebi-a-GCST90026372	FALSE	rs77231040	rs77231040	NA	NA	NA	NA	Mitochondrial DNA copy number	Mitochondrial DNA copy number || ||	TRUE	igd	10	106280527	0.0134649	2e-13	472174	ieu-b-4879	telomere length || id:ieu-b-4879	TRUE	reported	igd	2	FALSE
135	rs9940099	T	G	T	C	-0.033609	-0.0077	0.062718	NA	TRUE	FALSE	FALSE	ebi-a-GCST90026372	16	3613207	0.0093	383476	0.4078	Mitochondrial DNA copy number || id:ebi-a-GCST90026372	FALSE	rs9940099	rs9940099	NA	NA	NA	NA	Mitochondrial DNA copy number	Mitochondrial DNA copy number || ||	TRUE	igd	16	3613207	0.00411613	3.2e-16	472174	ieu-b-4879	telomere length || id:ieu-b-4879	TRUE	reported	igd	2	FALSE
