# Supplementary material for: New insights from bidirectional Mendelian randomization: causal relationships between telomere length and mitochondrial DNA copy number in aging biomarkers
Source: Aging (Albany NY). 2024 Apr 24;16(8):7387–404. doi: 10.18632/aging.205765 (PMC11087129; doi:10.18632/aging.205765)
Supplement: Supplementary Table 7 [file aging-16-205765-s008.xlsx]

## Sheet: Table s7 The results of MR anal
Supplementary Table 7. The results of MR analysis between exposure and outcome.
id.exposure	id.outcome	outcome	exposure	method	nsnp	β	se	pval	lo_ci	up_ci	or	or_lci95	or_uci95
mtDNA copy number to TL
ebi-a-GCST90026372	ieu-b-4879	telomere length || id:ieu-b-4879	Mitochondrial DNA copy number || id:ebi-a-GCST90026372	MR Egger	50	0.0214763	0.0448422	0.634162	-0.0664144	0.109367	1.02171	0.935743	1.11557
ebi-a-GCST90026372	ieu-b-4879	telomere length || id:ieu-b-4879	Mitochondrial DNA copy number || id:ebi-a-GCST90026372	Weighted median	50	0.00820415	0.0214012	0.70146	-0.0337422	0.0501505	1.00824	0.966821	1.05143
ebi-a-GCST90026372	ieu-b-4879	telomere length || id:ieu-b-4879	Mitochondrial DNA copy number || id:ebi-a-GCST90026372	Inverse variance weighted	50	0.00266726	0.0194533	0.890943	-0.0354613	0.0407958	1.00267	0.96516	1.04164
ebi-a-GCST90026372	ieu-b-4879	telomere length || id:ieu-b-4879	Mitochondrial DNA copy number || id:ebi-a-GCST90026372	Simple mode	50	0.0400248	0.0399321	0.321113	-0.0382421	0.118292	1.04084	0.96248	1.12557
ebi-a-GCST90026372	ieu-b-4879	telomere length || id:ieu-b-4879	Mitochondrial DNA copy number || id:ebi-a-GCST90026372	Weighted mode	50	0.0146195	0.0251575	0.563823	-0.0346892	0.0639283	1.01473	0.965906	1.06602
TL to mtDNA copy number
ieu-b-4879	ebi-a-GCST90026372	Mitochondrial DNA copy number || id:ebi-a-GCST90026372	telomere length || id:ieu-b-4879	MR Egger	115	0.0503129	0.0219348	0.0236535	0.00732073	0.0933051	1.0516	1.00735	1.0978
ieu-b-4879	ebi-a-GCST90026372	Mitochondrial DNA copy number || id:ebi-a-GCST90026372	telomere length || id:ieu-b-4879	Weighted median	115	0.0446597	0.0158411	0.00481379	0.0136112	0.0757082	1.04567	1.0137	1.07865
ieu-b-4879	ebi-a-GCST90026372	Mitochondrial DNA copy number || id:ebi-a-GCST90026372	telomere length || id:ieu-b-4879	Inverse variance weighted	115	0.0539591	0.0125471	1.7e-05	0.0293669	0.0785513	1.05544	1.0298	1.08172
ieu-b-4879	ebi-a-GCST90026372	Mitochondrial DNA copy number || id:ebi-a-GCST90026372	telomere length || id:ieu-b-4879	Simple mode	115	0.0920316	0.0368062	0.0138257	0.0198915	0.164172	1.0964	1.02009	1.17842
ieu-b-4879	ebi-a-GCST90026372	Mitochondrial DNA copy number || id:ebi-a-GCST90026372	telomere length || id:ieu-b-4879	Weighted mode	115	0.0404337	0.0194801	0.040176	0.00225277	0.0786146	1.04126	1.00226	1.08179
